# Supplementary material for: Analyzing the interaction of human ACE2 and RBD of spike protein of SARS-CoV-2 in perspective of Omicron variant
Source: PubMed Central journal article supplement (PMC9149974; doi:10.17179/excli2022-4721), 2022-03-10
Supplement: EXCLI-21-610-s-001.pdf [file EXCLI-21-610-s-001.pdf]

**Supplementary material to:**

**Original article:**

**ANALYZING THE INTERACTION OF HUMAN ACE2 AND RBD  
OF SPIKE PROTEIN OF SARS-COV-2 IN PERSPECTIVE  
OFOMICRON VARIANT**

Arijit Samanta<sup>a</sup>, Syed Sahajada Mahafujul Alam<sup>a</sup>, Safdar Ali<sup>b</sup>, Mehboob Hoque<sup>a\*</sup>

<sup>a</sup> Applied Bio-Chemistry Laboratory, Department of Biological Sciences, Aliah University, Kolkata 700160, India

<sup>b</sup> Clinical and Applied Genomics (CAG) Laboratory, Department of Biological Sciences, Aliah University, Kolkata 700160, India

\* **Corresponding author:** Dr. Mehboob Hoque, Applied Bio-Chemistry Laboratory, Department of Biological Sciences, Aliah University, Kolkata 700160, India.

E-mails: [m\\_hoque@aliah.ac.in](mailto:m_hoque@aliah.ac.in), [hoquemehboob@gmail.com](mailto:hoquemehboob@gmail.com)

<https://dx.doi.org/10.17179/excli2022-4721>

This is an Open Access article distributed under the terms of the Creative Commons Attribution License (<http://creativecommons.org/licenses/by/4.0/>).

**Supplementary Table 1: Details of the SARS-CoV-2 variants.** The first submitted complete genome sequences were retrieved from GISAID

| SI No                                   | Variants                                 | Virus name                                   | Accession ID    | Submission Date | First detected in                     | Genome size (nucleotide) |
|-----------------------------------------|------------------------------------------|----------------------------------------------|-----------------|-----------------|---------------------------------------|--------------------------|
| <b>Reference</b>                        |                                          |                                              |                 |                 |                                       |                          |
| 1                                       | <b>(Wuhan Variant)</b>                   | WIV04                                        | EPI_ISL_402124  | 11.01.2020      | Wuhan                                 | 29891                    |
| <b>Variants of Concerns (VOCs)</b>      |                                          |                                              |                 |                 |                                       |                          |
| 2                                       | B.1.1.7 GR/501Y.V1 (Alpha)               | hCoV-19/England/CAMC-A58BA4/2020             | EPI_ISL_596982  | 2020-10-27      | United Kingdom                        | 29763                    |
| 3                                       | B.1.351 GH/501Y.V2 (Beta)                | hCoV-19/South Africa/KRISP-K004599/2020      | EPI_ISL_660629  | 2020-11-27      | South Africa                          | 29848                    |
| 4                                       | B.1.1.28.1, alias P.1 GR/501Y.V3 (Gamma) | hCoV-19/Brazil/AM-FIOCRUZ-20143138FN-R2/2020 | EPI_ISL_811149  | 2021-01-13      | Brazil                                | 29593                    |
| 5                                       | B.1.617 G/452R.V3 (Delta)                | hCoV-19/India/MH-NEERI-NGP-29787/2021        | EPI_ISL_1360328 | 2021-03-25      | India                                 | 29839                    |
| 6                                       | B.1.1.529 (Omicron)                      | hCoV19/Botswana/R40B60_BHP_3321001247/2021   | EPI_ISL_6640917 | 2021-11-23      | Botswana / Hong Kong / South Africa   | 29684                    |
| <b>Variants of Interest (VOIs)</b>      |                                          |                                              |                 |                 |                                       |                          |
| 7                                       | C.37, GR/452Q.V1 (Lambda)                | hCoV-19/Peru/LIM-INS-436/2021                | EPI_ISL_1111334 | 2021-03-01      | Peru                                  | 29901                    |
| 8                                       | B.1.621, GH (Mu)                         | hCoV-19/Colombia/RIS-VG-3857/2021            | EPI_ISL_3369952 | 2021-08-12      | Colombia                              | 29902                    |
| <b>Variants Under Monitoring (VUMs)</b> |                                          |                                              |                 |                 |                                       |                          |
| 9                                       | C.1.2                                    | hCoV-19/South Africa/KRISP-K020275/2021      | EPI_ISL_3447714 | 2021-08-17      | South Africa                          | 29803                    |
| 10                                      | B.1.617.1 (Kappa)                        | hCoV-19/India/WB-1931300244219/2021          | EPI_ISL_1357699 | 2021-03-25      | India                                 | 29781                    |
| 11                                      | B.1.630                                  | hCoV-19/Dominican Republic/33884/2021        | EPI_ISL_3045385 | 2021-07-22      | Dominican Republic                    | 29799                    |
| 12                                      | B.1.640                                  | hCoV-19/Congo/FCRM-100-A32.28.09.21/2021     | EPI_ISL_5592661 | 2021-10-27      | Republic of Congo                     | 29683                    |
| <b>Formerly Under Monitoring</b>        |                                          |                                              |                 |                 |                                       |                          |
| 13                                      | B.1.427 B.1.429 (Epsilon)                | hCoV-19/USA/CA-CZB-12872/2020                | EPI_ISL_648527  | 2020-11-21      | United States of America              | 29816                    |
| 14                                      | R.1                                      | hCoV-19/Japan/IC-0386/2020                   | EPI_ISL_736897  | 2020-12-26      | Asia / Japan                          | 29770                    |
| 15                                      | B.1.466.2                                | hCoV-19/Indonesia/JI-ITDua-33281NT/2020      | EPI_ISL_877419  | 2021-01-27      | Indonesia                             | 29890                    |
| 16                                      | B.1.1.318                                | hCoV-19/England/ALDP-115DB1E/2021            | EPI_ISL_937654  | 2021-02-05      | Europe / United Kingdom / England     | 29753                    |
| 17                                      | B.1.1.519                                | hCoV-19/Japan/IC-0377/2020                   | EPI_ISL_721617  | 2020-12-21      | Asia / Japan                          | 29768                    |
| 18                                      | C.36.3                                   | hCoV-19/USA/TX-HMH-MCoV-27355/2021           | EPI_ISL_1237137 | 2021-03-13      | North America / USA / Texas / Houston | 29804                    |
| 19                                      | B.1.214.2                                | hCoV-19/England/ALDP-CB0759/2020             | EPI_ISL_760951  | 2021-01-04      | Europe / United Kingdom / England     | 29750                    |

**Supplementary Table 1 (cont.): Details of the SARS-CoV-2 variants.** The first submitted complete genome sequences were retrieved from GISAID

| SI No | Variants       | Virus name                               | Accession ID    | Submission Date | First detected in                      | Genome size (nucleotide) |
|-------|----------------|------------------------------------------|-----------------|-----------------|----------------------------------------|--------------------------|
| 20    | B.1.1.523      | hCoV-19/Switzerland/GE-33615516/2021     | EPI_ISL_1448584 | 2021-04-02      | Europe / Switzerland / Geneva          | 29856                    |
| 21    | B.1.619        | hCoV-19/Germany/BE-RKI-I-020766/2021     | EPI_ISL_1150929 | 2021-03-04      | Europe / Germany / Berlin              | 29809                    |
| 22    | B.1.620        | hCoV-19/Lithuania/LTU000_NMVRI55624/2021 | EPI_ISL_1579527 | 2021-04-13      | Europe / Lithuania / Vilnius apskritis | 29840                    |
| 23    | B.1.526 (Lota) | hCoV-19/USA/NY-Wadsworth-290357-01/2020  | EPI_ISL_765494  | 2021-01-04      | United States of America               | 29782                    |
| 24    | B.1.525 (Eta)  | hCoV-19/England/CAMC-C769B3/2020         | EPI_ISL_760883  | 2021-01-04      | United Kingdom                         | 29709                    |
| 25    | AV.1           | hCoV-19/England/QEUI-148F257/2021        | EPI_ISL_1595332 | 2021-04-15      | United Kingdom                         | 29764                    |
| 26    | AT.1           | hCoV-19/Russia/PSK-16/2021               | EPI_ISL_1259283 | 2021-03-16      | Russian Federation                     | 29803                    |

**Supplementary Table 2: SWISS Model parameters of the predicted 3D structures of RBDs of SARS-CoV-2 variants**

| Variants                                          | Accession ID    | Tem-plate Swiss model ID | Features of template used in generating S Protein model |        |             |                       |           | Quality assess-ment of the S Protein model |      |
|---------------------------------------------------|-----------------|--------------------------|---------------------------------------------------------|--------|-------------|-----------------------|-----------|--------------------------------------------|------|
|                                                   |                 |                          | Se-quence Identity                                      | Method | Resolu-tion | Se-quence similar-ity | Cover-age | QMEAN                                      | GMQE |
| B.1.1.7<br>GR/501Y.V1<br>(Alpha)                  | EPI_ISL_596982  | 7lww.1.A                 | 100.00%                                                 | EM     | -           | 0.63                  | 1.00      | 0.78                                       | 0.84 |
| B.1.351<br>GH/501Y.V2<br>(Beta)                   | EPI_ISL_660629  | 7lww.1.A                 | 100.00%                                                 | EM     | -           | 0.63                  | 1.00      | 0.77                                       | 0.84 |
| B.1.1.28.1,<br>alias P.1<br>GR/501Y.V3<br>(Gamma) | EPI_ISL_811149  | 7v78.1.A                 | 100.00%                                                 | EM     | -           | 0.63                  | 1.00      | 0.74                                       | 0.81 |
| B.1.617<br>G/452R.V3<br>(Delta)                   | EPI_ISL_1360328 | 7cn4.1.A                 | 89.69%                                                  | EM     | -           | 0.59                  | 1.00      | 0.70                                       | 0.77 |
| B.1.1.529<br>(Omicron)                            | EPI_ISL_6640917 | 7lyq.1.A                 | 94.17%                                                  | EM     | -           | 0.61                  | 1.00      | 0.74                                       | 0.81 |
| C.37,<br>GR/452Q.V1<br>(Lambda)                   | EPI_ISL_1111334 | 6zgf.1.A                 | 89.69%                                                  | EM     | -           | 0.59                  | 1.00      | 0.72                                       | 0.78 |
| B.1.621, GH<br>(Mu)                               | EPI_ISL_3369952 | 6xc4.1.A                 | 99.55%                                                  | X-ray  | 2.34 Å      | 0.63                  | 1.00      | 0.80                                       | 0.80 |
| B.1.427<br>B.1.429<br>(Epsilon)                   | EPI_ISL_648527  | 7cn4.1.A                 | 89.69%                                                  | EM     | -           | 0.59                  | 1.00      | 0.70                                       | 0.77 |
| R.1                                               | EPI_ISL_736897  | 6xc4.1.A                 | 99.55%                                                  | X-ray  | 2.34 Å      | 0.63                  | 1.00      | 0.80                                       | 0.80 |
| B.1.466.2                                         | EPI_ISL_877419  | 6xc4.1.A                 | 99.55%                                                  | X-ray  | 2.34 Å      | 0.63                  | 1.00      | 0.80                                       | 0.80 |
| B.1.1.318                                         | EPI_ISL_937654  | 6xc4.1.A                 | 99.55%                                                  | X-ray  | 2.34 Å      | 0.63                  | 1.00      | 0.80                                       | 0.80 |
| B.1.1.519                                         | EPI_ISL_721617  | 6xc4.1.A                 | 99.55%                                                  | X-ray  | 2.34 Å      | 0.63                  | 1.00      | 0.80                                       | 0.80 |
| C.36.3                                            | EPI_ISL_1237137 | 7lww.1.A                 | 100.00%                                                 | EM     | -           | 0.63                  | 1.00      | 0.78                                       | 0.84 |
| B.1.214.2                                         | EPI_ISL_760951  | 6xc4.1.A                 | 99.55%                                                  | X-ray  | 2.34 Å      | 0.63                  | 1.00      | 0.80                                       | 0.80 |
| B.1.1.523                                         | EPI_ISL_1448584 | 6xc4.1.A                 | 99.10%                                                  | X-ray  | 2.34 Å      | 0.63                  | 1.00      | 0.80                                       | 0.80 |
| B.1.619                                           | EPI_ISL_1150929 | 6xc4.1.A                 | 99.55%                                                  | X-ray  | 2.34 Å      | 0.63                  | 1.00      | 0.80                                       | 0.80 |
| B.1.620                                           | EPI_ISL_1579527 | 6xc4.1.A                 | 99.10%                                                  | X-ray  | 2.34 Å      | 0.63                  | 1.00      | 0.80                                       | 0.80 |
| C.1.2                                             | EPI_ISL_3447714 | 7lww.1.A                 | 99.10%                                                  | EM     | -           | 0.63                  | 1.00      | 0.77                                       | 0.84 |
| B.1.617.1<br>(Kappa)                              | EPI_ISL_1357699 | 7cn4.1.A                 | 89.69%                                                  | EM     | -           | 0.59                  | 1.00      | 0.70                                       | 0.77 |
| B.1.526<br>(Lota)                                 | EPI_ISL_765494  | 6xc4.1.A                 | 99.55%                                                  | X-ray  | 2.34 Å      | 0.63                  | 1.00      | 0.80                                       | 0.80 |
| B.1.525<br>(Eta)                                  | EPI_ISL_760883  | 6xc4.1.A                 | 99.55%                                                  | X-ray  | 2.34 Å      | 0.63                  | 1.00      | 0.80                                       | 0.80 |
| B.1.630                                           | EPI_ISL_3045385 | 7sbl.1.A                 | 99.10%                                                  | EM     | 3.44 Å      | 0.63                  | 1.00      | 0.73                                       | 0.10 |
| B.1.640                                           | EPI_ISL_5592661 | 7lww.1.A                 | 98.21%                                                  | EM     | -           | 0.63                  | 1.00      | 0.78                                       | 0.84 |
| AV.1                                              | EPI_ISL_1595332 | 6xc4.1.A                 | 99.10%                                                  | X-ray  | 2.34 Å      | 0.63                  | 1.00      | 0.81                                       | 0.80 |
| AT.1                                              | EPI_ISL_1259283 | 6xc4.1.A                 | 99.55%                                                  | X-ray  | 2.34 Å      | 0.63                  | 1.00      | 0.80                                       | 0.80 |



**Supplementary Table 3: S protein RBD model validation parameters obtained in SAVES and ProSA**

| Variants                                          | Accession ID    | ERRAT          | % of the residues have averaged 3D-1D score $\geq 0.2$ | Ramachandran plot |       |       | G-factors | Z-Score      |
|---------------------------------------------------|-----------------|----------------|--------------------------------------------------------|-------------------|-------|-------|-----------|--------------|
|                                                   |                 |                |                                                        | core              | allow | gener |           |              |
| B.1.1.7<br>GR/501Y.V1<br>(Alpha)                  | EPI_ISL_596982  | <b>94.5364</b> | 93.12%                                                 | 88.4%             | 11.2% | 0.3%  | -0.19     | <b>-5.93</b> |
| B.1.351<br>GH/501Y.V2<br>(Beta)                   | EPI_ISL_660629  | <b>94.0594</b> | 91.18%                                                 | 89.3%             | 10.5% | 0.2%  | -0.20     | <b>-5.62</b> |
| B.1.1.28.1,<br>alias P.1<br>GR/501Y.V3<br>(Gamma) | EPI_ISL_811149  | <b>81.1287</b> | 87.89%                                                 | 87.0%             | 12.4% | 0.3%  | -0.14     | <b>-5.48</b> |
| B.1.617<br>G/452R.V3<br>(Delta)                   | EPI_ISL_1360328 | <b>93.6594</b> | 93.72%                                                 | 78.6%             | 21.2% | 0.2%  | -0.21     | <b>-5.58</b> |
| B.1.1.529<br>(Omicron)                            | EPI_ISL_6640917 | <b>96.6443</b> | 95.37%                                                 | 87.7%             | 11.8% | 0.5%  | -0.24     | <b>-5.56</b> |
| C.37,<br>GR/452Q.V1<br>(Lambda)                   | EPI_ISL_1111334 | <b>80</b>      | 96.71%                                                 | 83.2%             | 16.2% | 0.5%  | -0.22     | <b>-5.52</b> |
| B.1.621, GH<br>(Mu)                               | EPI_ISL_3369952 | <b>97.076</b>  | 100.00%                                                | 90.6%             | 9.4%  | 0.0   | -0.14     | <b>-5.96</b> |
| B.1.427<br>B.1.429<br>(Epsilon)                   | EPI_ISL_648527  | <b>93.8739</b> | 93.57%                                                 | 78.4%             | 20.9% | 0.7%  | -0.22     | <b>-5.6</b>  |
| R.1                                               | EPI_ISL_736897  | <b>96.5116</b> | 97.99%                                                 | 90.6%             | 9.4%  | 0.0%  | -0.13     | <b>-5.88</b> |
| B.1.466.2                                         | EPI_ISL_877419  | <b>96.5116</b> | 96.98%                                                 | 90.6%             | 9.4%  | 0.0%  | -0.14     | <b>-5.87</b> |
| B.1.1.318                                         | EPI_ISL_937654  | <b>96.5116</b> | 97.99%                                                 | 90.6%             | 9.4%  | 0.0%  | -0.13     | <b>-5.88</b> |
| B.1.1.519                                         | EPI_ISL_721617  | <b>97.0588</b> | 97.99%                                                 | 90.6%             | 9.4%  | 0.0%  | -0.15     | <b>-6.01</b> |
| C.36.3                                            | EPI_ISL_1237137 | <b>94.5364</b> | 93.12%                                                 | 88.4%             | 11.2% | 0.3%  | -0.19     | <b>-5.93</b> |
| B.1.214.2                                         | EPI_ISL_760951  | <b>96.5116</b> | 97.99%                                                 | 90.6%             | 9.4%  | 0.0%  | -0.14     | <b>-5.99</b> |
| B.1.1.523                                         | EPI_ISL_1448584 | <b>96.5116</b> | 98.49%                                                 | 90.6%             | 9.4%  | 0.0%  | -0.14     | <b>-5.84</b> |
| B.1.619                                           | EPI_ISL_1150929 | <b>96.5116</b> | 97.99%                                                 | 90.6%             | 9.4%  | 0.0%  | -0.13     | <b>-5.88</b> |
| B.1.620                                           | EPI_ISL_1579527 | <b>97.076</b>  | 97.99%                                                 | 90.6%             | 9.4%  | 0.0%  | -0.13     | <b>-5.92</b> |
| C.1.2                                             | EPI_ISL_3447714 | <b>94.4816</b> | 93.12%                                                 | 88.4%             | 11.2% | 0.3%  | -0.18     | <b>-6</b>    |
| B.1.617.1<br>(Kappa)                              | EPI_ISL_1357699 | <b>93.6594</b> | 93.72%                                                 | 78.6%             | 21.2% | 0.2%  | -0.21     | <b>-5.58</b> |
| B.1.526<br>(Lota)                                 | EPI_ISL_765494  | <b>96.5116</b> | 97.99%                                                 | 90.6%             | 9.4%  | 0.0%  | -0.13     | <b>-5.88</b> |
| B.1.525<br>(Eta)                                  | EPI_ISL_760883  | <b>96.5116</b> | 97.99%                                                 | 90.6%             | 9.4%  | 0.0%  | -0.13     | <b>-5.88</b> |
| B.1.630                                           | EPI_ISL_3045385 | <b>89.2857</b> | 93.27%                                                 | 86.5%             | 13.1% | 0.3%  | -0.25     | <b>-5.28</b> |
| B.1.640                                           | EPI_ISL_5592661 | <b>94.01</b>   | 92.97%                                                 | 88.3%             | 11.4% | 0.3%  | -0.19     | <b>-6.08</b> |
| AV.1                                              | EPI_ISL_1595332 | <b>96.5116</b> | 96.98%                                                 | 90.6%             | 9.4%  | 0.0%  | -0.13     | <b>-5.87</b> |
| AT.1                                              | EPI_ISL_1259283 | <b>96.5116</b> | 97.99%                                                 | 90.6%             | 9.4%  | 0.0%  | -0.13     | <b>-5.88</b> |

**Supplementary Table 4: Comparative analysis of interacting amino acid residues between hACE and Omicron RBD with all other variant RBD**

| Variants                    | S Protein RBD                          |                                                 |                                      | hACE2 Receptor                         |                                                 |                                      |
|-----------------------------|----------------------------------------|-------------------------------------------------|--------------------------------------|----------------------------------------|-------------------------------------------------|--------------------------------------|
|                             | No. of Total Interacting Amino Acid(s) | No. of Amino Acid residues identical to Omicron | % of identical residues with Omicron | No. of Total Interacting Amino Acid(s) | No. of Amino Acid residues identical to Omicron | % of identical residues with Omicron |
| EPI ISL 402124(WIV04)       | 17                                     | 0                                               | <b>0</b>                             | 20                                     | 3                                               | 15                                   |
| EPI ISL 596982(B.1.1.7 )    | 29                                     | 26                                              | 89.66                                | 47                                     | 22                                              | 46.81                                |
| EPI ISL 660629(B.1.351 )    | 32                                     | 28                                              | <b>90.32</b>                         | 56                                     | 33                                              | 58.93                                |
| EPI ISL 811149(B.1.1.28.1)  | 25                                     | 13                                              | 52                                   | 34                                     | 1                                               | 2.94                                 |
| EPI ISL 1360328(B.1.617)    | 33                                     | 27                                              | 81.82                                | 58                                     | 25                                              | 43.10                                |
| EPI ISL 1111334(C.37)       | 21                                     | 21                                              | <b>100</b>                           | 46                                     | 14                                              | 30.43                                |
| EPI ISL 3369952(B.1.621)    | 33                                     | 0                                               | <b>0</b>                             | 32                                     | 5                                               | 15.63                                |
| EPI ISL 648527(B.1.427)     | 33                                     | 27                                              | 81.82                                | 58                                     | 24                                              | 41.38                                |
| EPI ISL 736897(R.1)         | 23                                     | 0                                               | <b>0</b>                             | 34                                     | 2                                               | 5.88                                 |
| EPI ISL 877419(B.1.466.2)   | 36                                     | 0                                               | <b>0</b>                             | 32                                     | 5                                               | 15.63                                |
| EPI ISL 937654(B.1.1.318)   | 32                                     | 0                                               | <b>0</b>                             | 34                                     | 2                                               | 5.88                                 |
| EPI ISL 721617(B.1.1.519)   | 32                                     | 0                                               | <b>0</b>                             | 33                                     | 5                                               | 15.15                                |
| EPI ISL 1237137(C.36.3)     | 31                                     | 26                                              | 83.87                                | 47                                     | 22                                              | 46.81                                |
| EPI ISL 760951(B.1.214.2)   | 33                                     | 0                                               | <b>0</b>                             | 30                                     | 5                                               | 16.67                                |
| EPI ISL 1448584 (B.1.1.523) | 31                                     | 0                                               | <b>0</b>                             | 35                                     | 2                                               | 5.71                                 |
| EPI ISL 1150929(B.1.619)    | 34                                     | 0                                               | <b>0</b>                             | 34                                     | 2                                               | 5.88                                 |
| EPI ISL 1579527(B.1.620)    | 23                                     | 0                                               | <b>0</b>                             | 27                                     | 0                                               | <b>0</b>                             |
| EPI ISL 3447714(C.1.2)      | 28                                     | 26                                              | <b>92.86</b>                         | 45                                     | 23                                              | 51.11                                |
| EPI ISL 1357699(B.1.617.1)  | 33                                     | 27                                              | 81.82                                | 58                                     | 25                                              | 43.10                                |
| EPI ISL 765494(B.1.526)     | 32                                     | 0                                               | <b>0</b>                             | 34                                     | 2                                               | 5.88                                 |
| EPI ISL 760883(B.1.525)     | 32                                     | 0                                               | <b>0</b>                             | 34                                     | 2                                               | 5.88                                 |
| EPI ISL 3045385(B.1.630)    | 23                                     | 19                                              | 82.61                                | 49                                     | 11                                              | 22.45                                |
| EPI ISL 5592661(B.1.640)    | 29                                     | 26                                              | 89.66                                | 47                                     | 22                                              | 46.81                                |
| EPI ISL 1595332(AV.1)       | 34                                     | 0                                               | <b>0</b>                             | 33                                     | 2                                               | 6.06                                 |
| EPI ISL 1259283(AT.1)       | 32                                     | 0                                               | <b>0</b>                             | 34                                     | 2                                               | 5.89                                 |

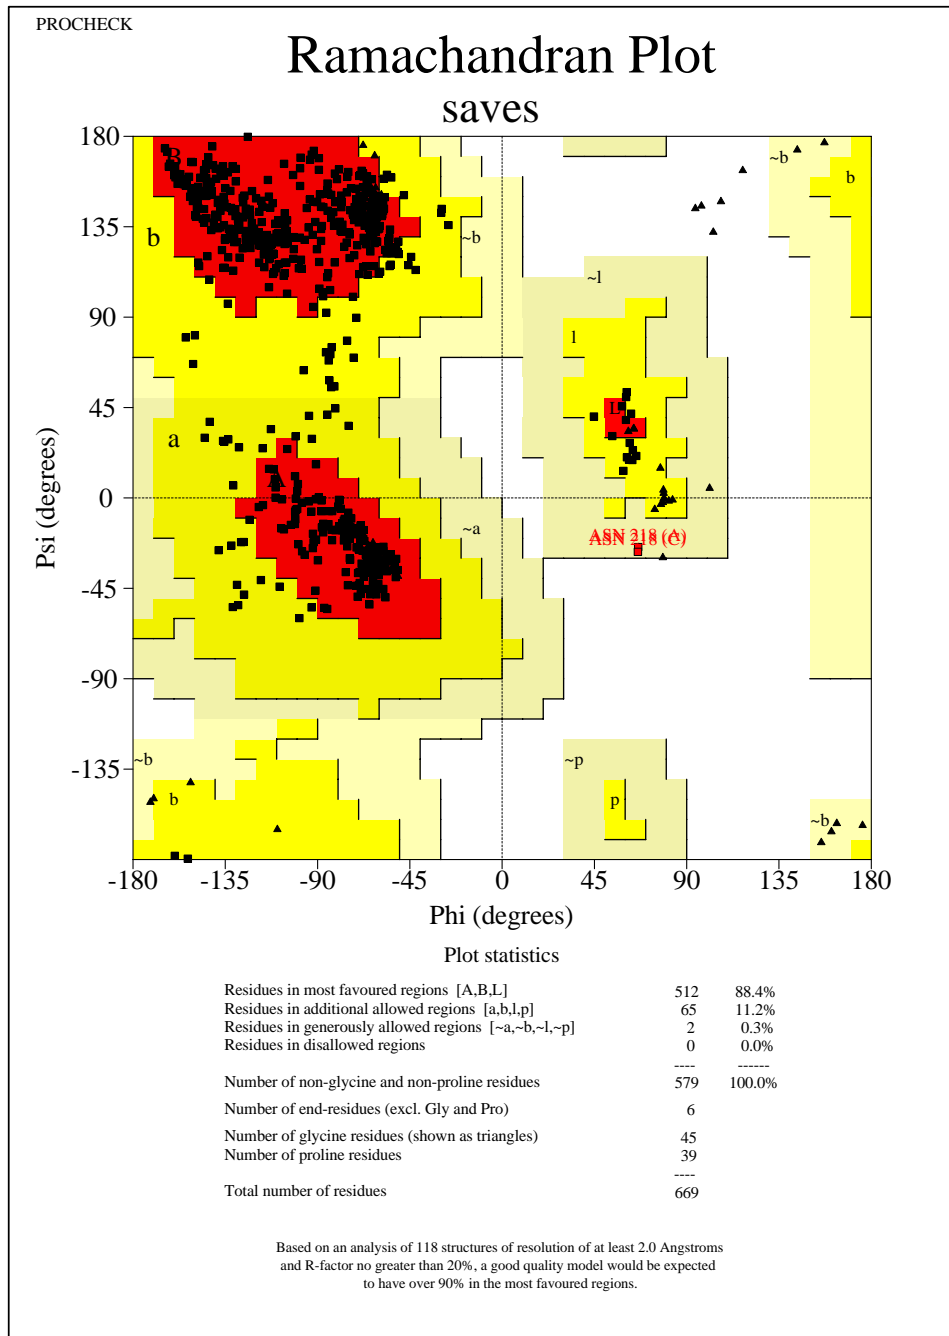

saves\_01.ps

**Supplementary Figure1(A):** The PROCHECK Ramachandran plot for the validation of the 3D model of Spike RBD of SARS-CoV-2 B.1.1.7(Alpha) variant (EPI\_ISL\_596982)

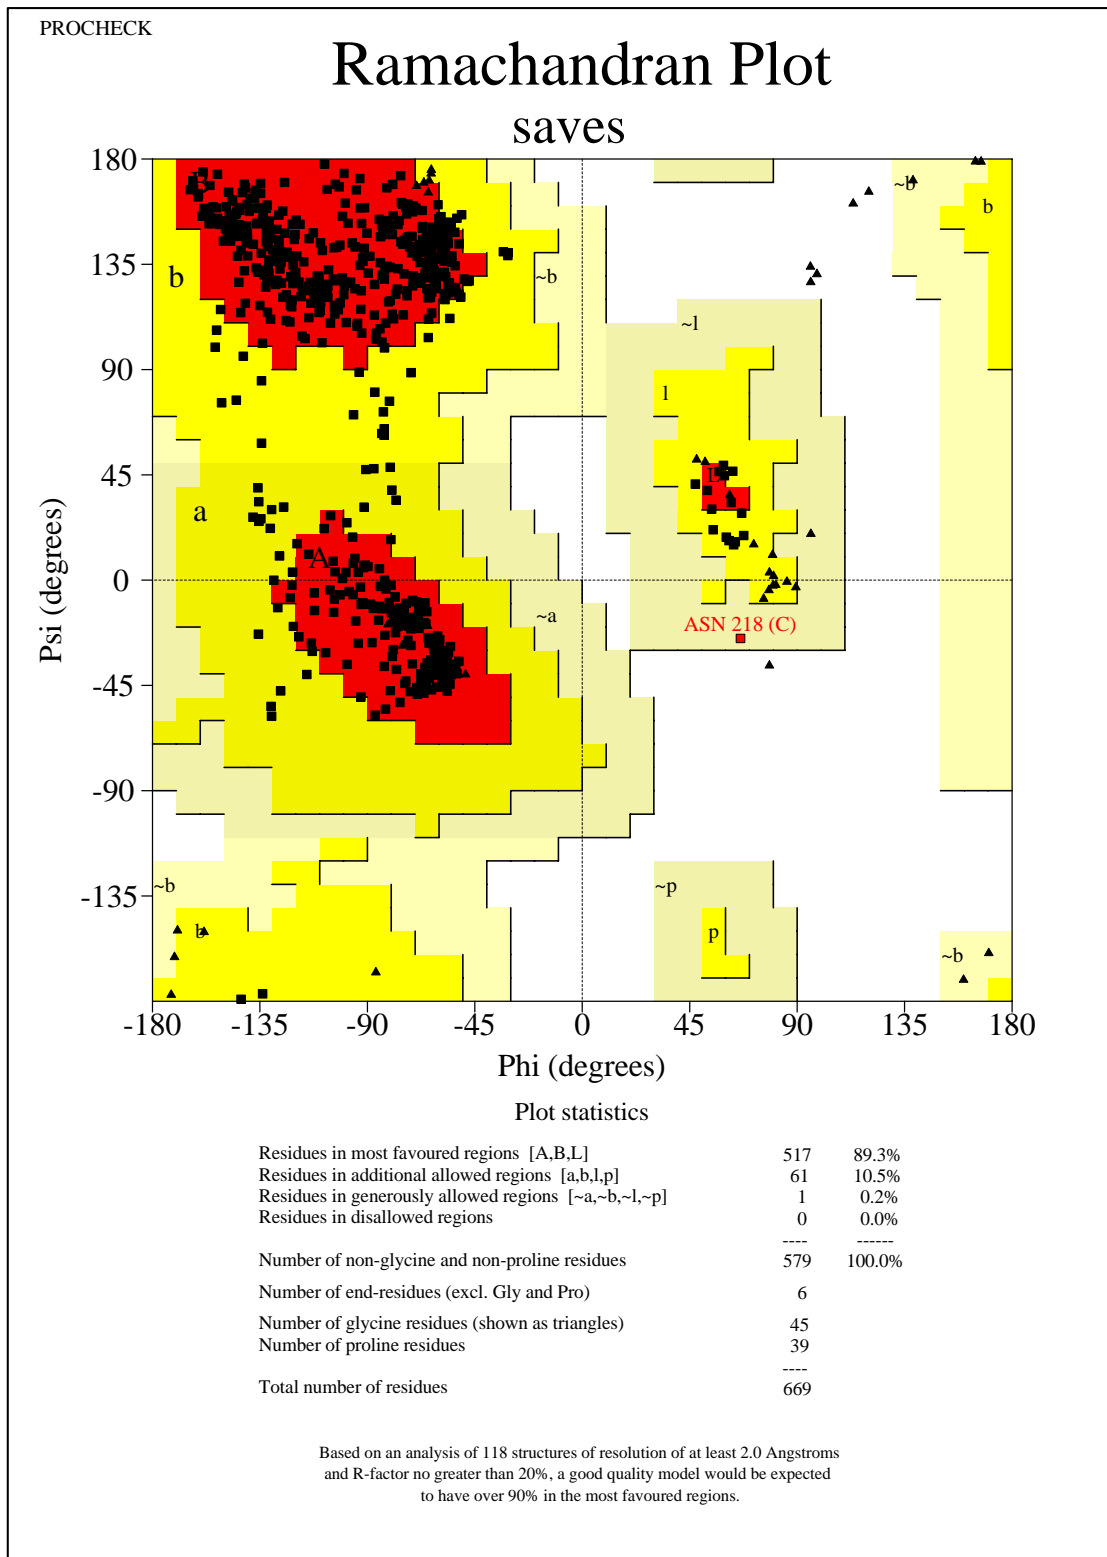

**Supplementary Figure 1(B):** The PROCHECK Ramachandran plot for the validation of the 3D model of Spike RBD of SARS-CoV-2 B.1.351 (Beta) variant (EPI\_ISL\_660629)

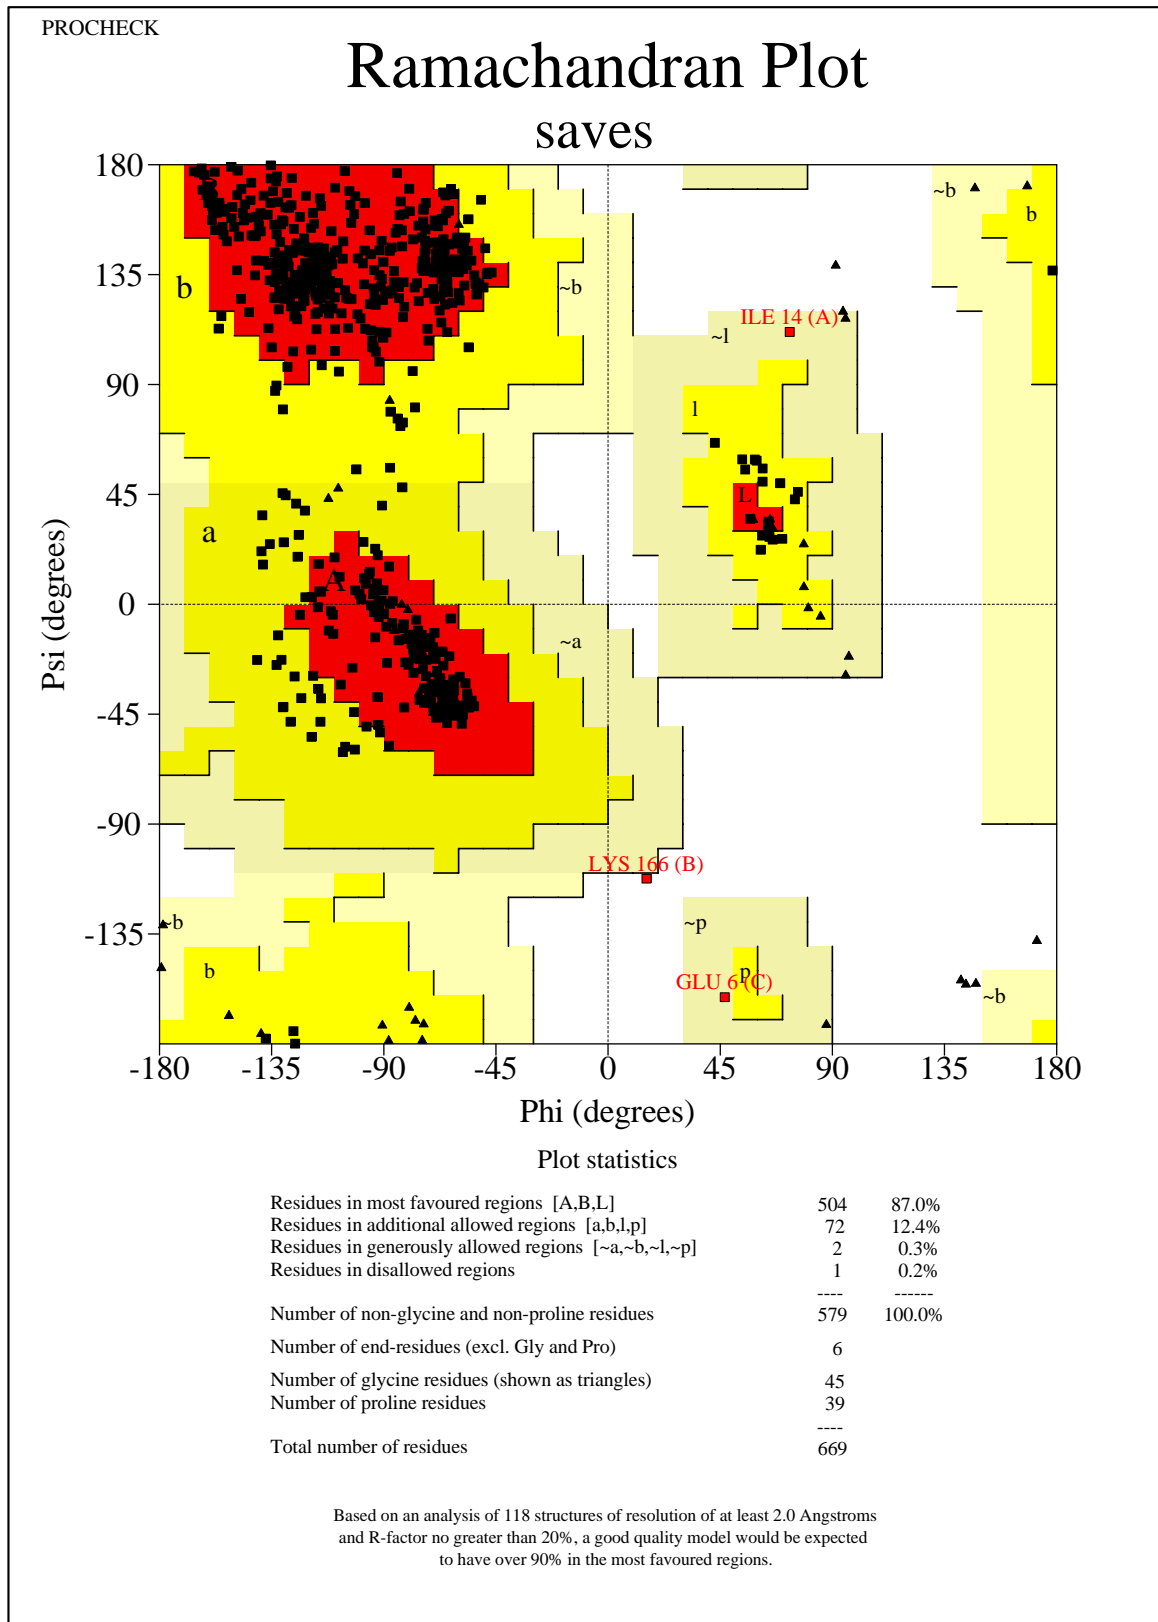

saves\_01.ps

**Supplementary Figure 1(C):** The PROCHECK Ramachandran plot for the validation of the 3D model of Spike RBD of SARS-CoV-2 B.1.1.28.1(Gamma) variant EPI\_ISL\_811149

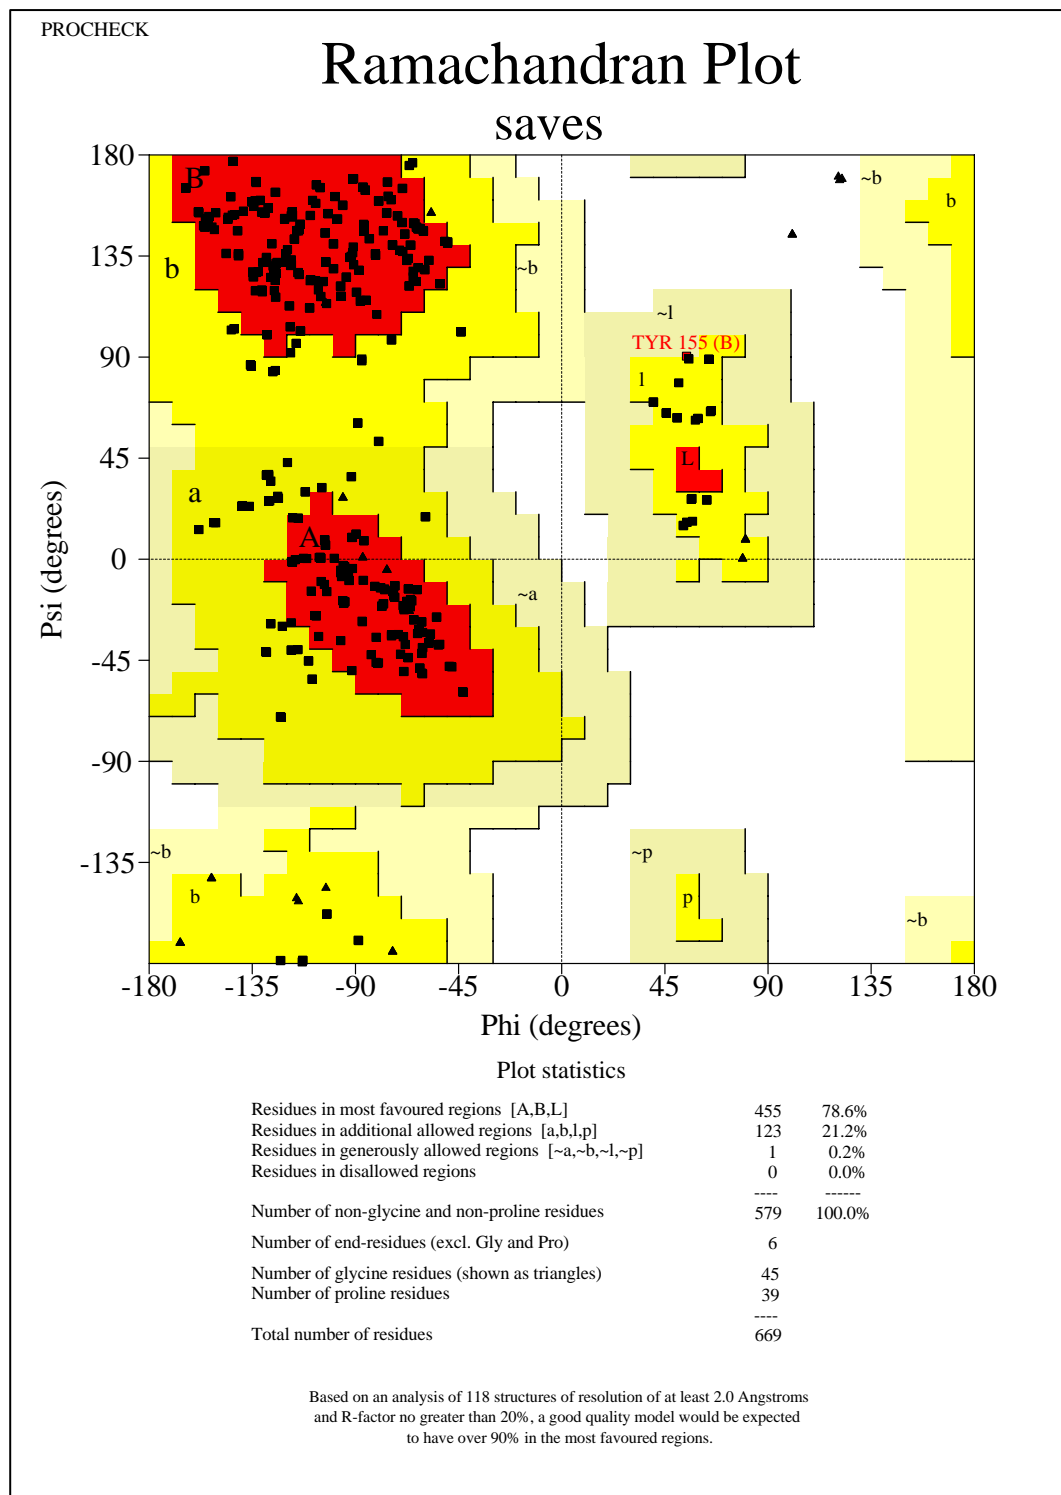

**Supplementary Figure 1(D):** The PROCHECK Ramachandran plot for the validation of the 3D model of Spike RBD of SARS-CoV-2 B.1.617(Delta) variant (EPI\_ISL\_1360328)

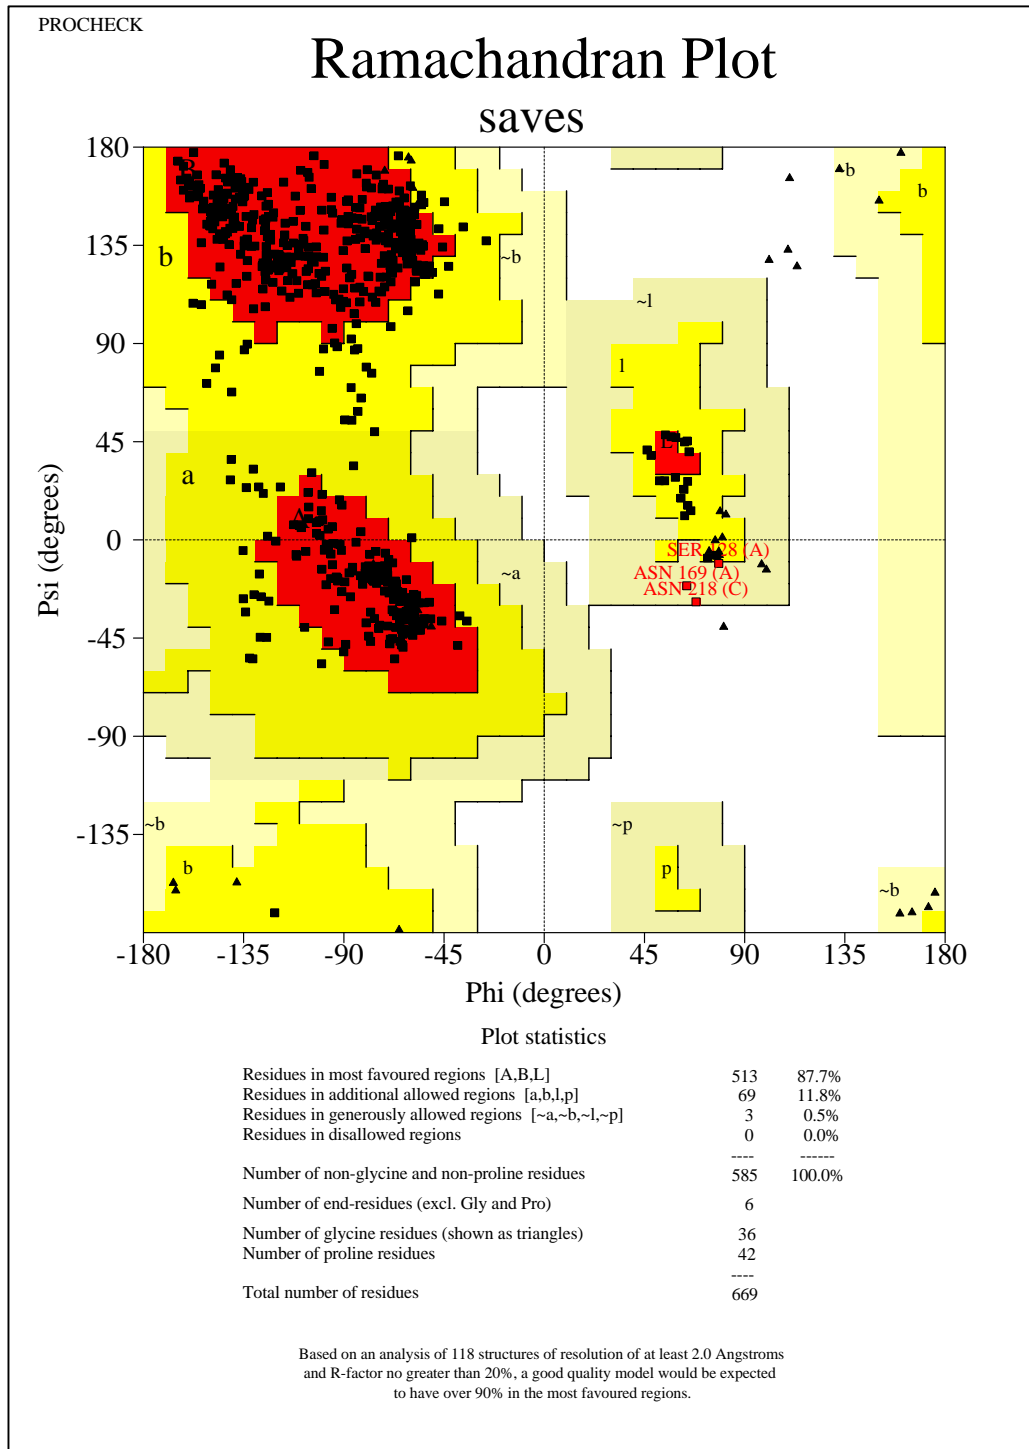

saves\_01.ps

**Supplementary Figure 1(E):** The PROCHECK Ramachandran plot for the validation of the 3D model of Spike RBD of SARS-CoV-2 B.1.1.529(Omicron) variant (EPI\_ISL\_6640917)

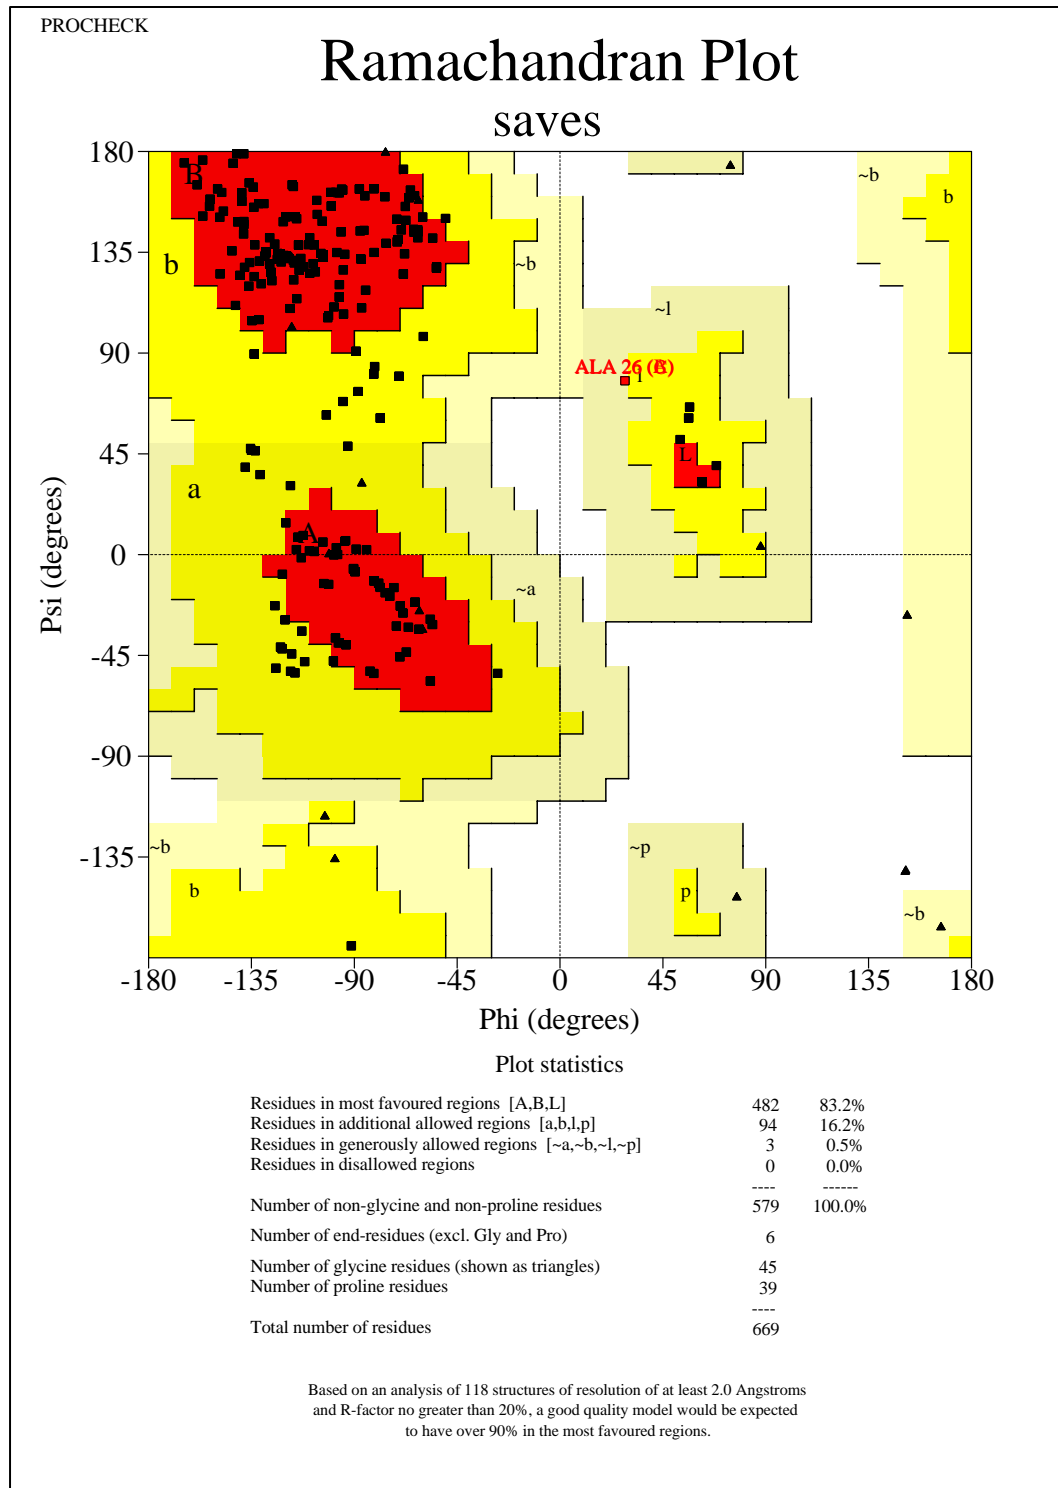

**Supplementary Figure 1(F):** The PROCHECK Ramachandran plot for the validation of the 3D model of Spike RBD of SARS-CoV-2 C.37(Lambda) variant (EPI\_ISL\_1111334)



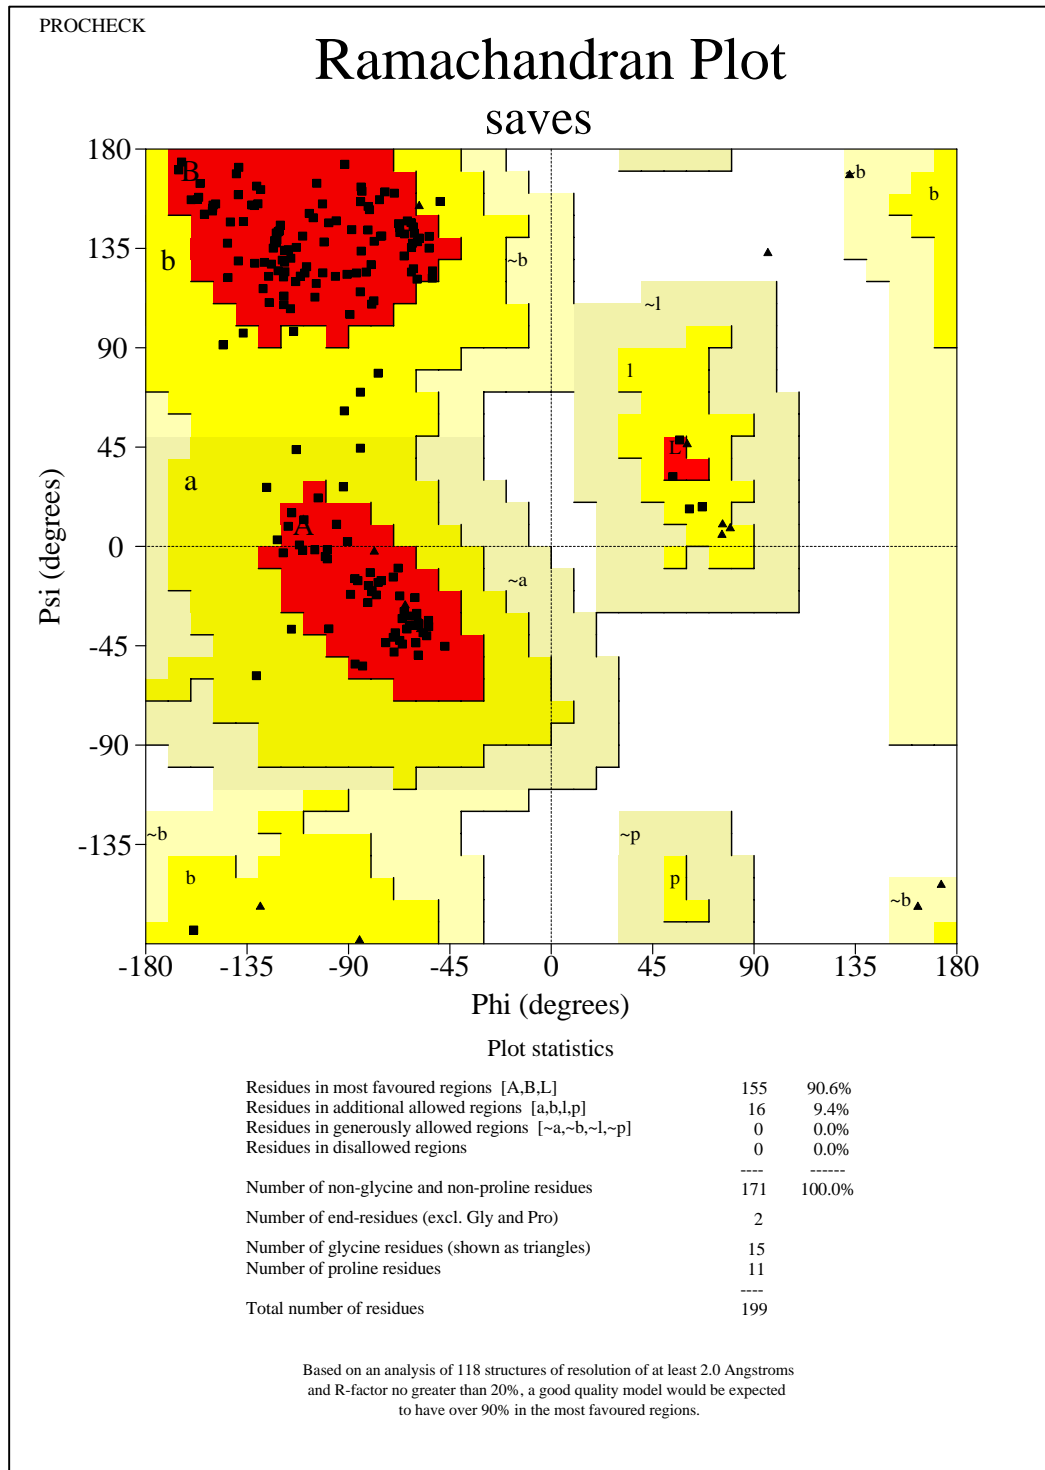

**Supplementary Figure 1(G):** The PROCHECK Ramachandran plot for the validation of the 3D model of Spike RBD of SARS-CoV-2 B.1.621(Mu) variant (EPI\_ISL\_3369952)

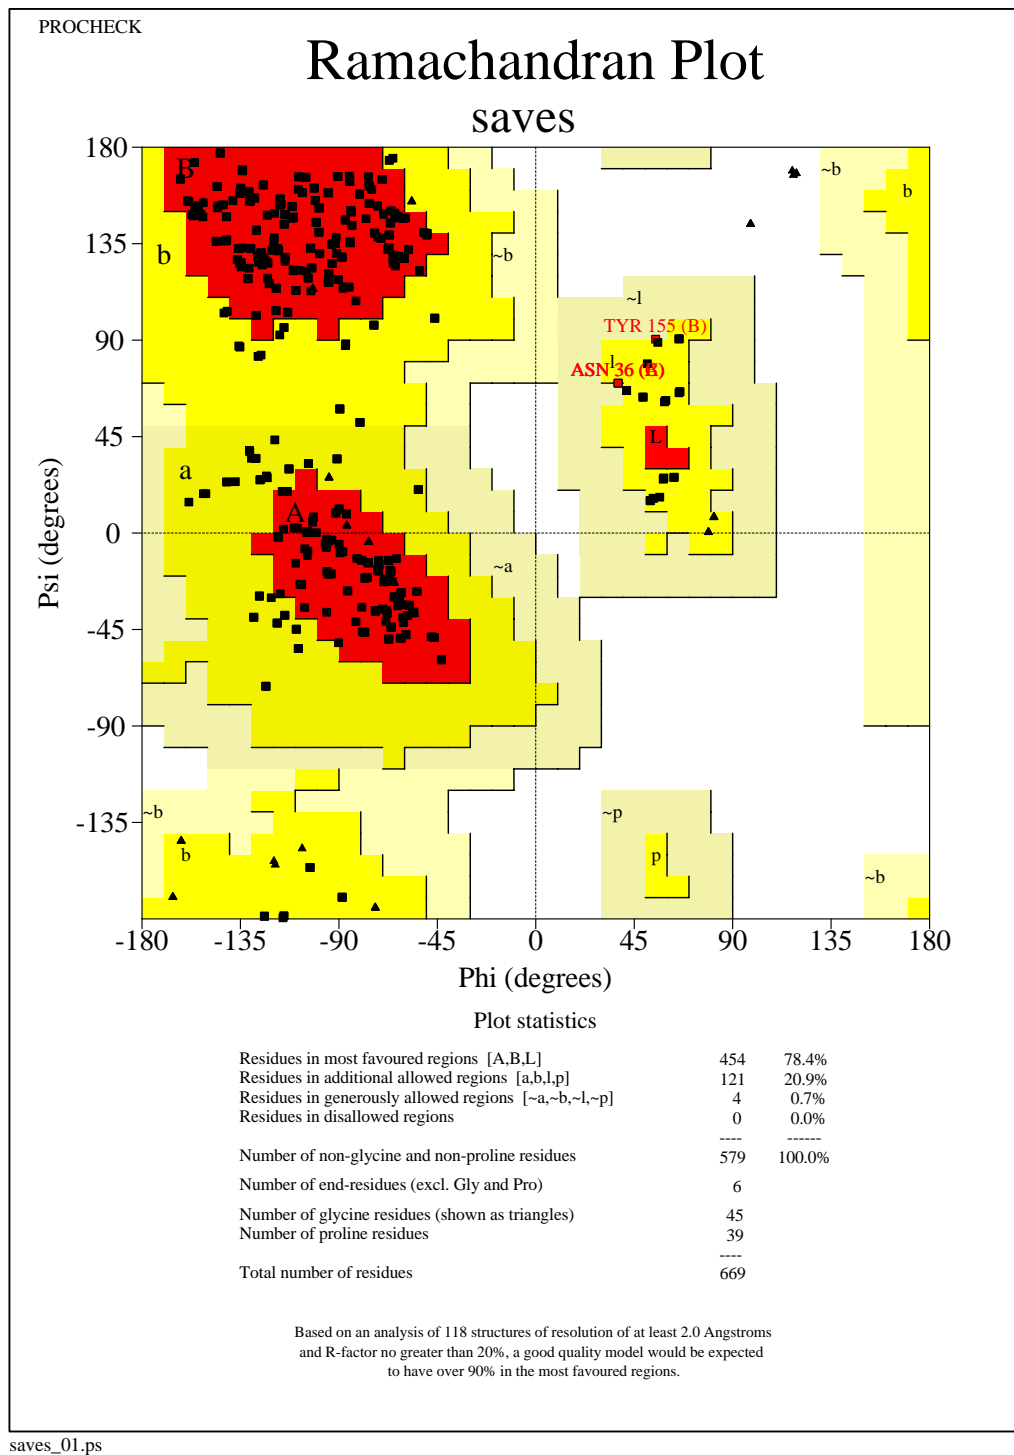

**Supplementary Figure 1(H):** The PROCHECK Ramachandran plot for the validation of the 3D model of Spike RBD of SARS-CoV-2 B.1.427/B.1.429(Epsilon) variant (EPI\_ISL\_648527)

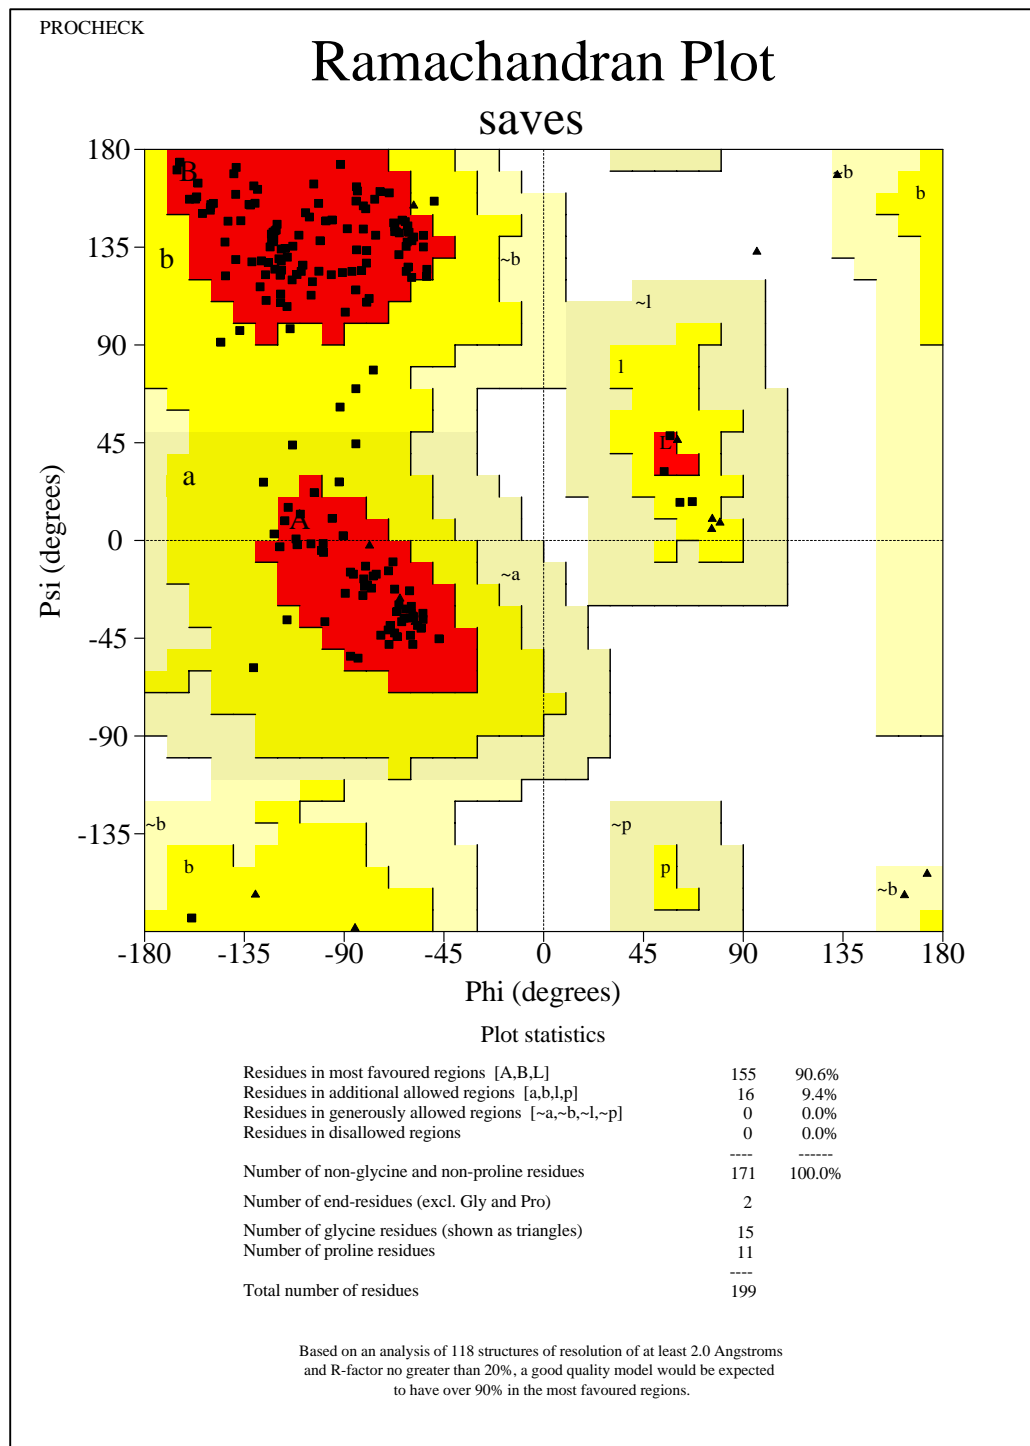

**Supplementary Figure 1(I):** The PROCHECK Ramachandran plot for the validation of the 3D model of Spike RBD of SARS-CoV-2 B.1.1.519 variant (EPI\_ISL\_721617)

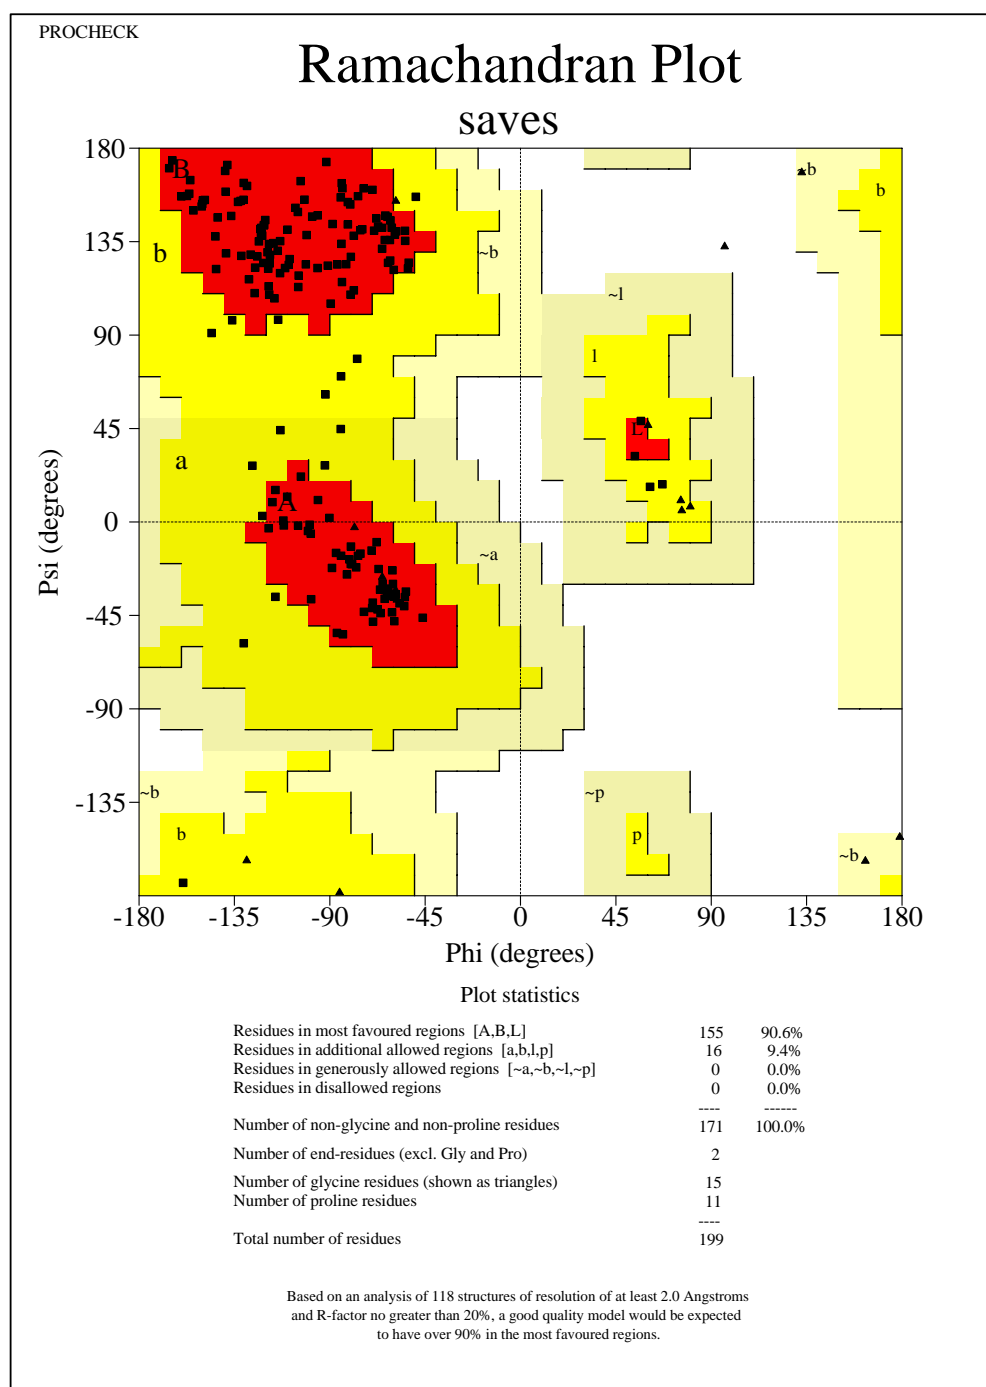

**Supplementary Figure 1(J):** The PROCHECK Ramachandran plot for the validation of the 3D model of Spike RBD of SARS-CoV-2 R.1 variant (EPI\_ISL\_736897)

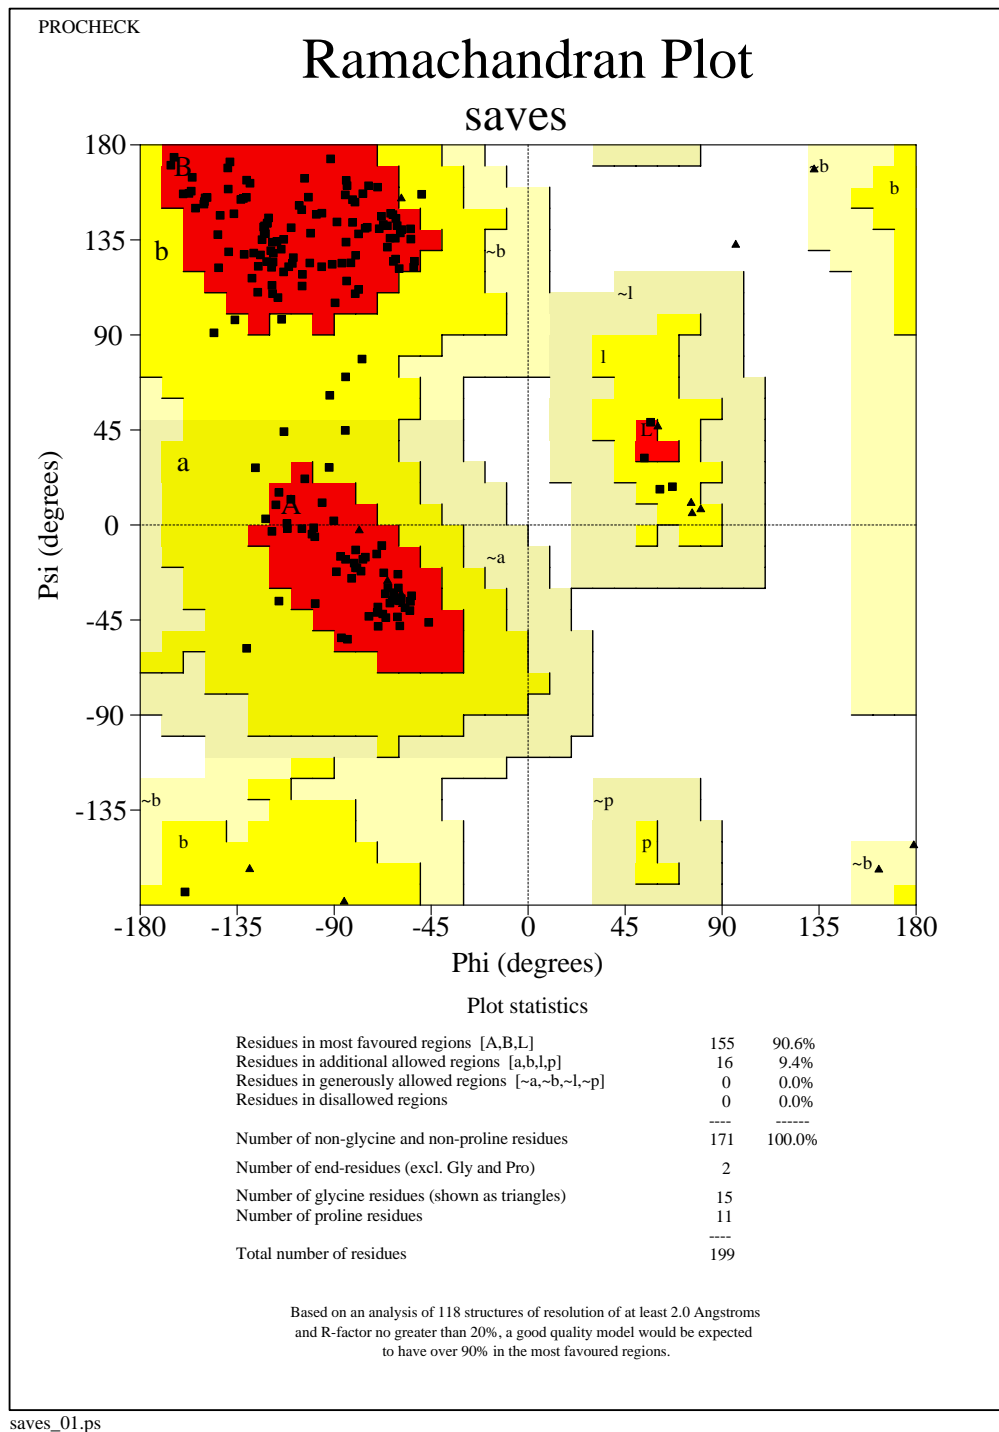

**Supplementary Figure 1(K):** The PROCHECK Ramachandran plot for the validation of the 3D model of Spike RBD of SARS-CoV-2 B.1.525(Eta) variant (EPI\_ISL\_760883)

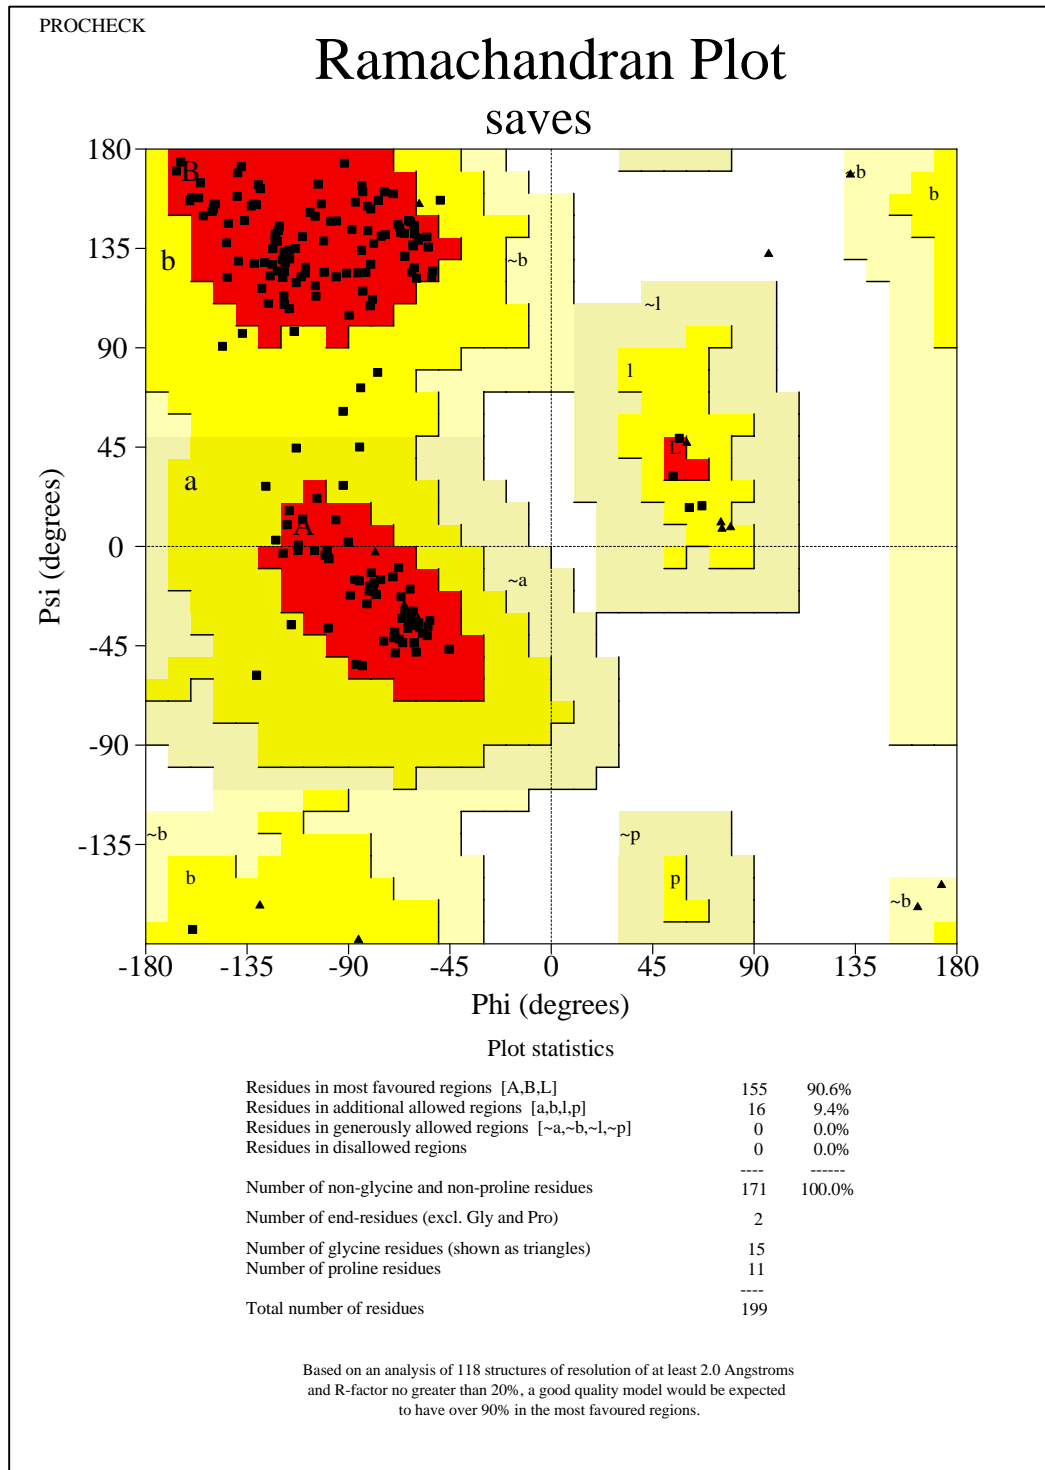

**Supplementary Figure 1(L):** The PROCHECK Ramachandran plot for the validation of the 3D model of Spike RBD of SARS-CoV-2 B.1.214.2 variant (EPI\_ISL\_760951)

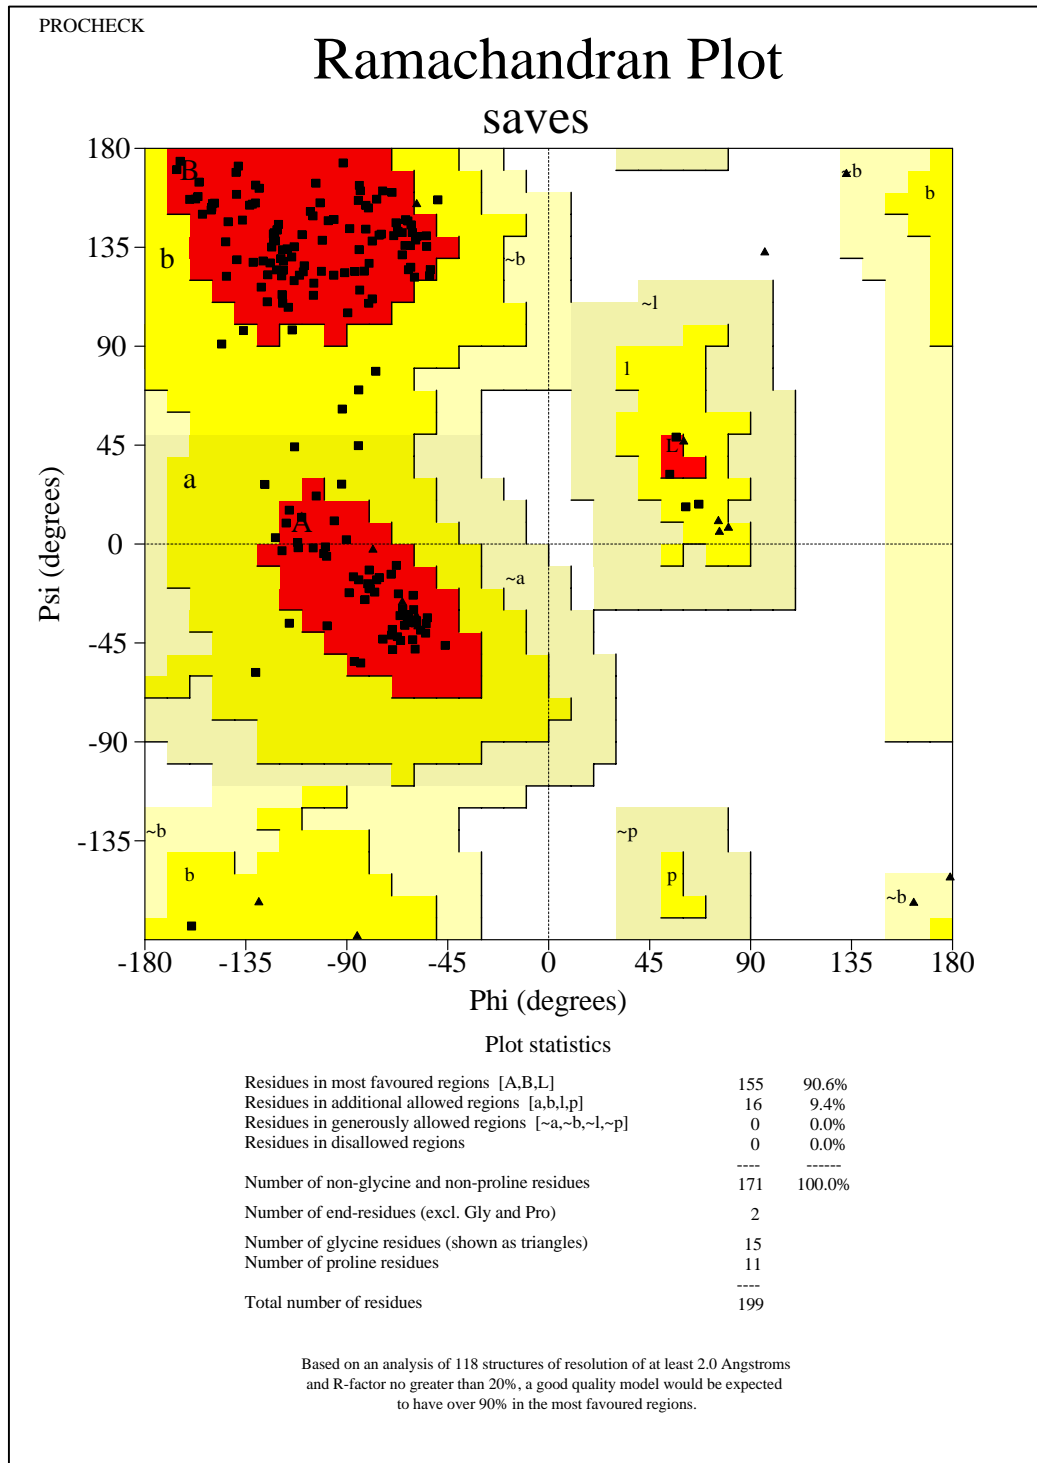

**Supplementary Figure 1(M):** The PROCHECK Ramachandran plot for the validation of the 3D model of Spike RBD of SARS-CoV-2 B.1.526(Lota) variant (EPI\_ISL\_765494)

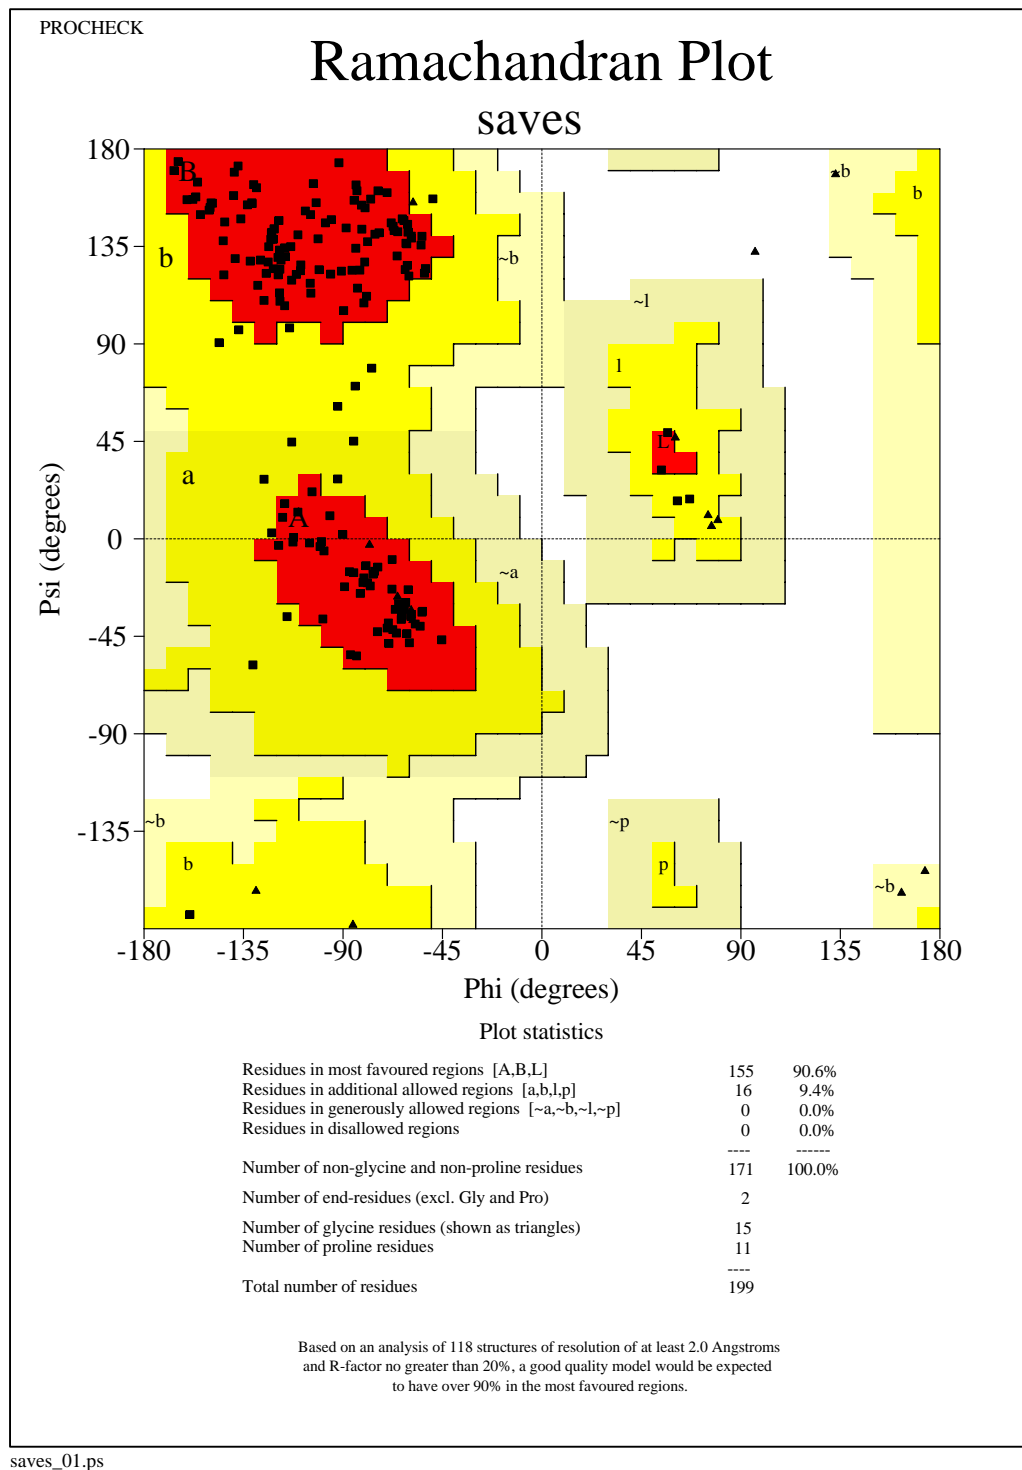

**Supplementary Figure 1(N):** The PROCHECK Ramachandran plot for the validation of the 3D model of Spike RBD of SARS-CoV-2 B.1.466.2 variant (EPI\_ISL\_877419)



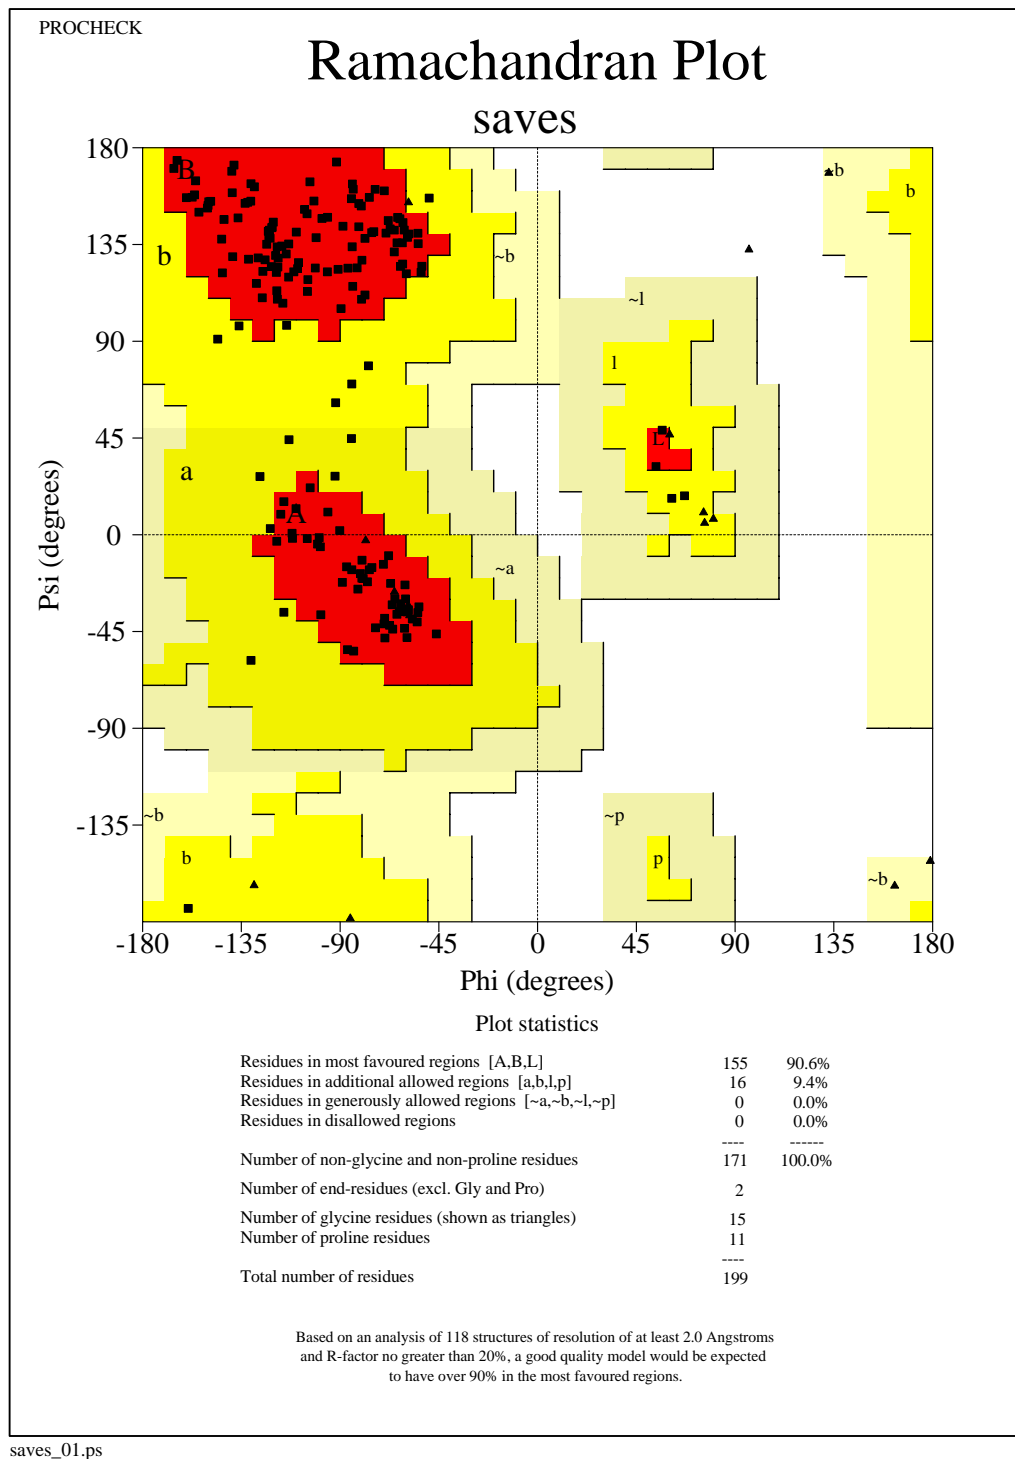

**Supplementary Figure 1(O):** The PROCHECK Ramachandran plot for the validation of the 3D model of Spike RBD of SARS-CoV-2 B.1.1.318 variant (EPI\_ISL\_937654)

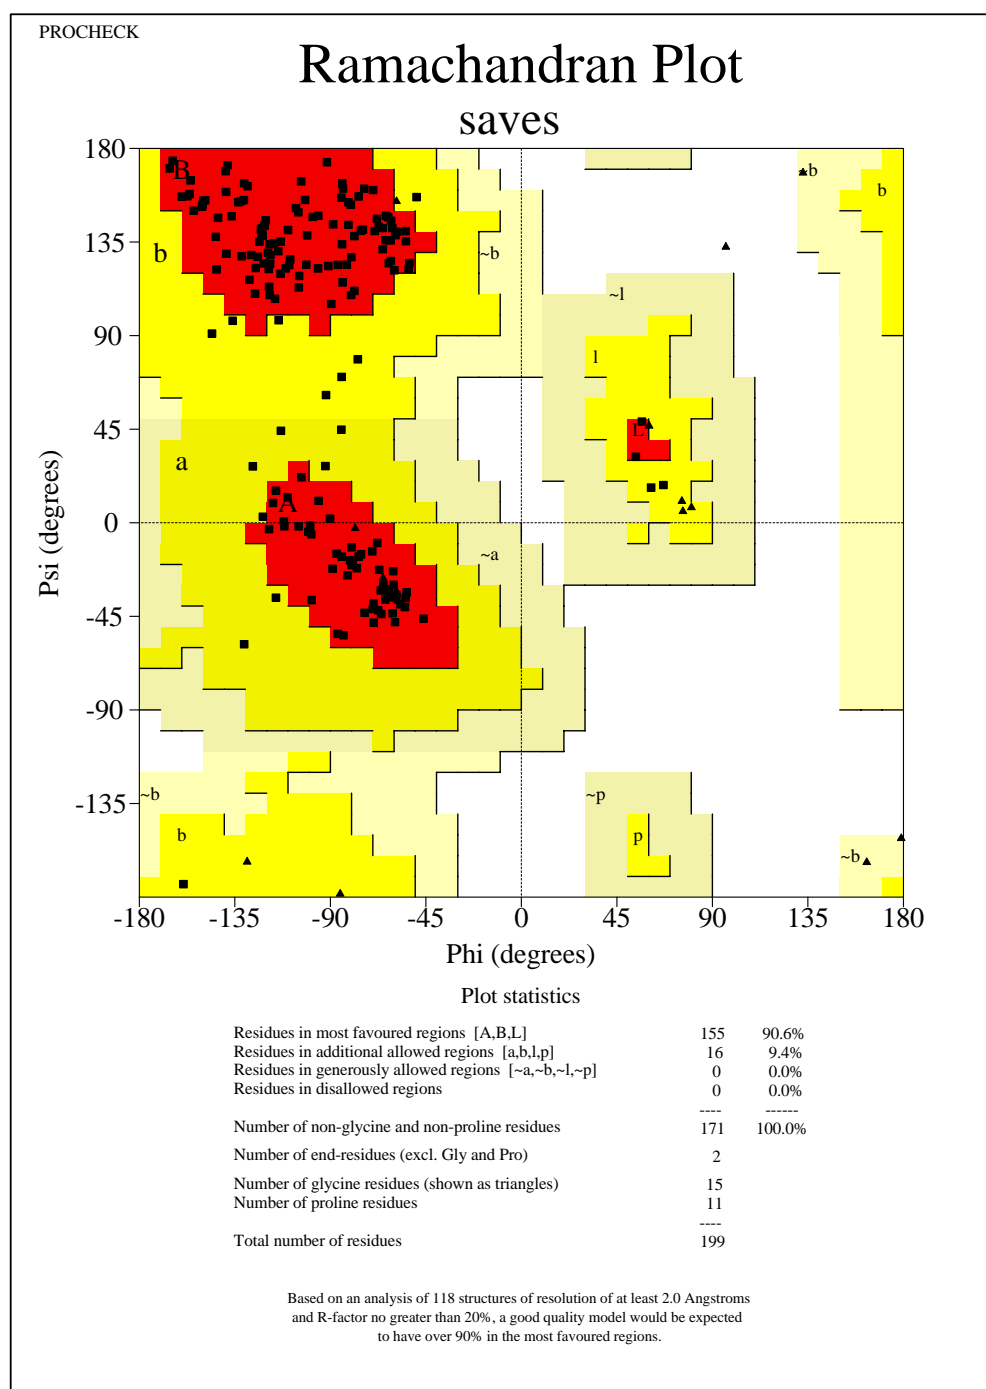

saves\_01.ps

**Supplementary Figure 1(P):** The PROCHECK Ramachandran plot for the validation of the 3D model of Spike RBD of SARS-CoV-2 B.1.619 variant (EPI\_ISL\_1150929)

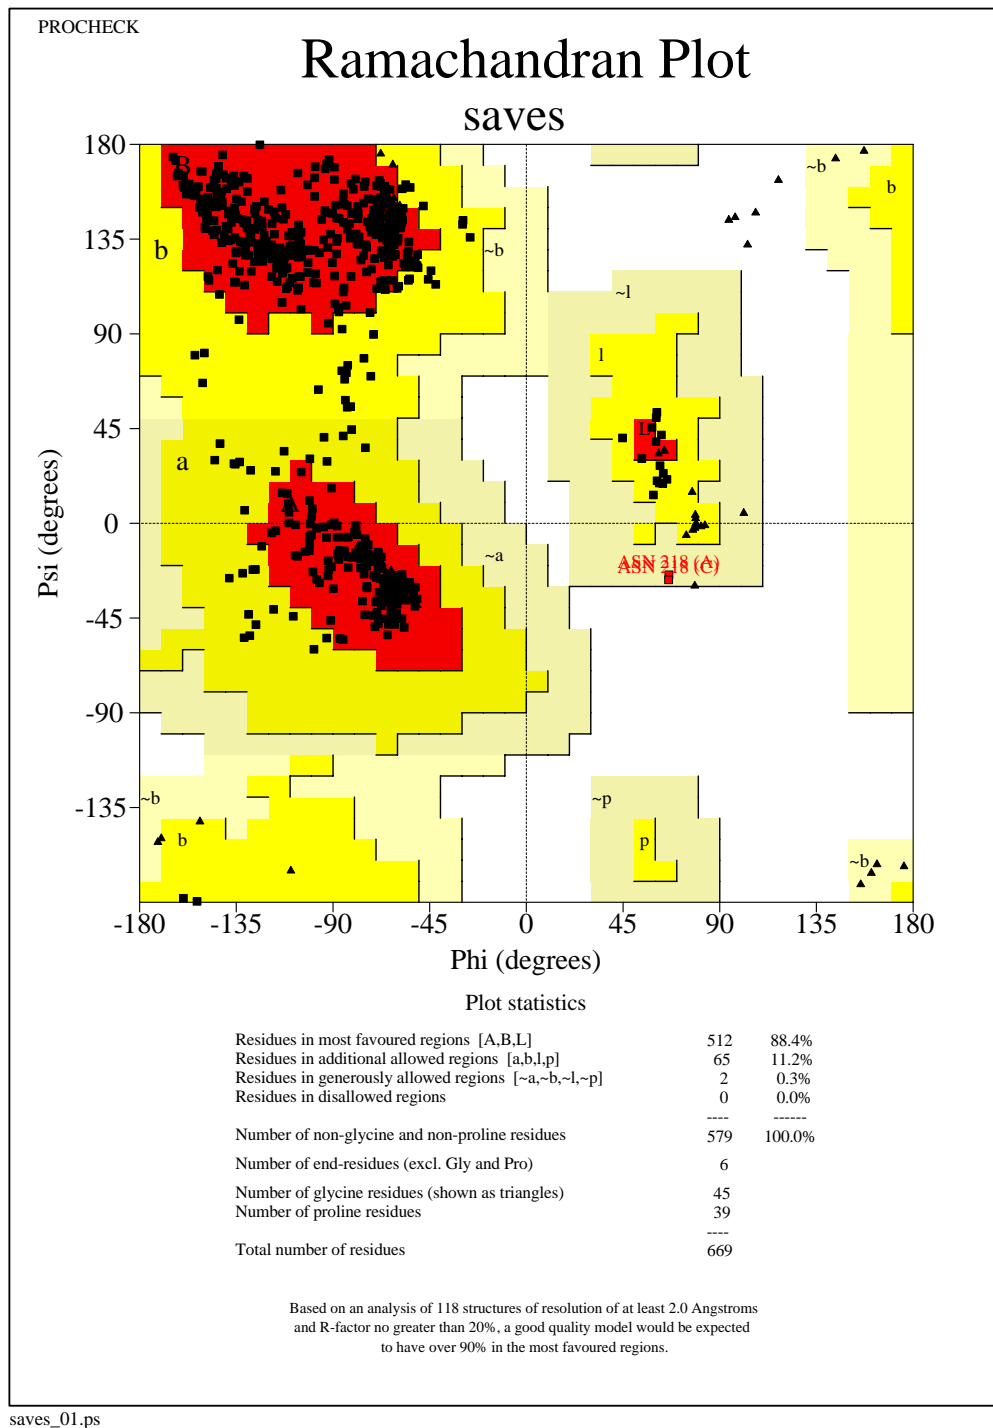

**Supplementary Figure 1(Q):** The PROCHECK Ramachandran plot for the validation of the 3D model of Spike RBD of SARS-CoV-2 C.36.3 variant (EPI\_ISL\_1237137)

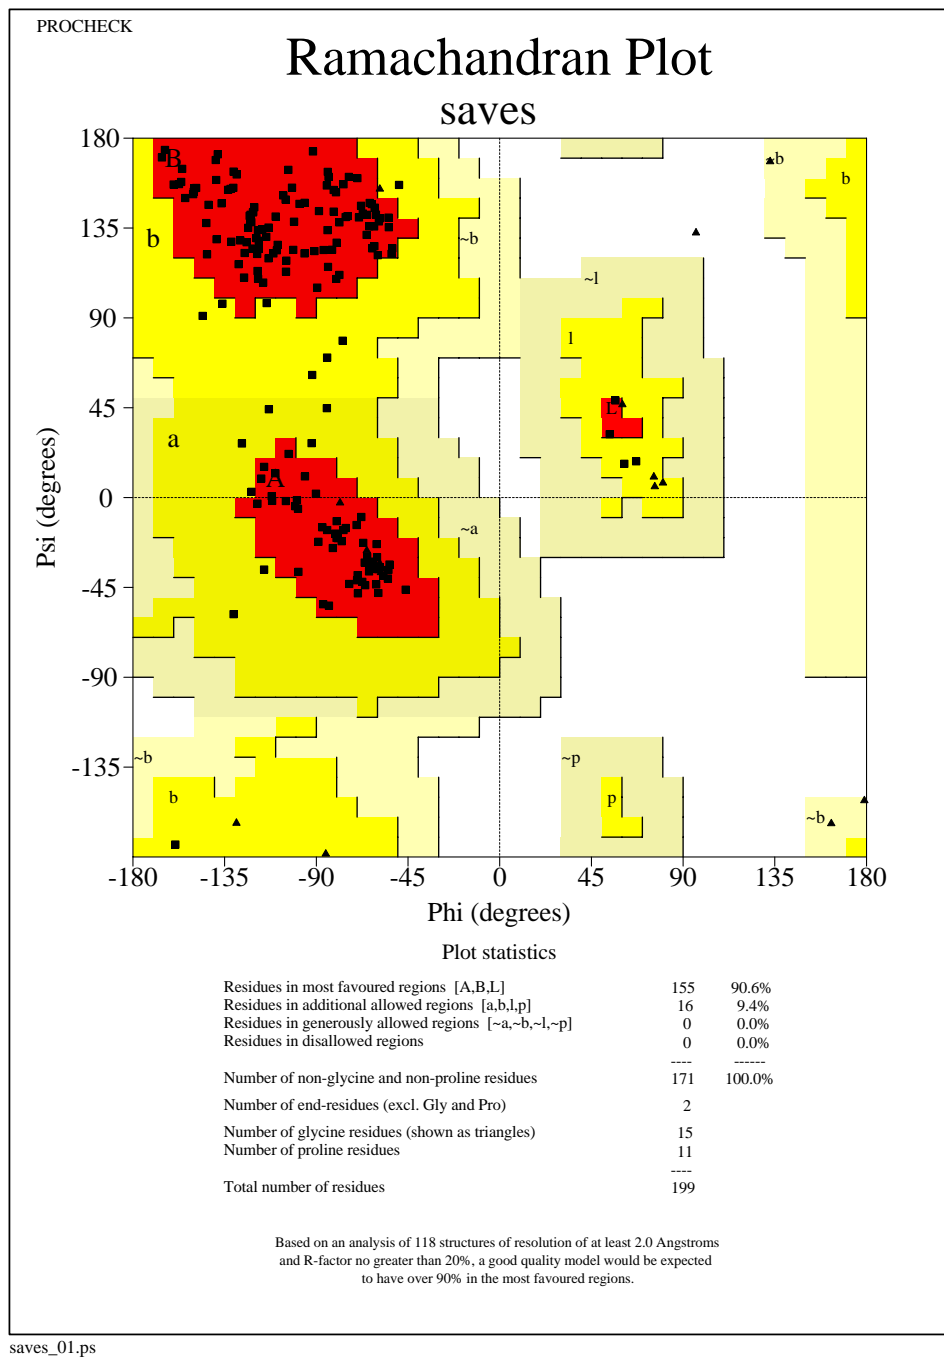

**Supplementary Figure 1(R):** The PROCHECK Ramachandran plot for the validation of the 3D model of Spike RBD of SARS-CoV-2 AT.1 variant (EPI\_ISL\_1259283)

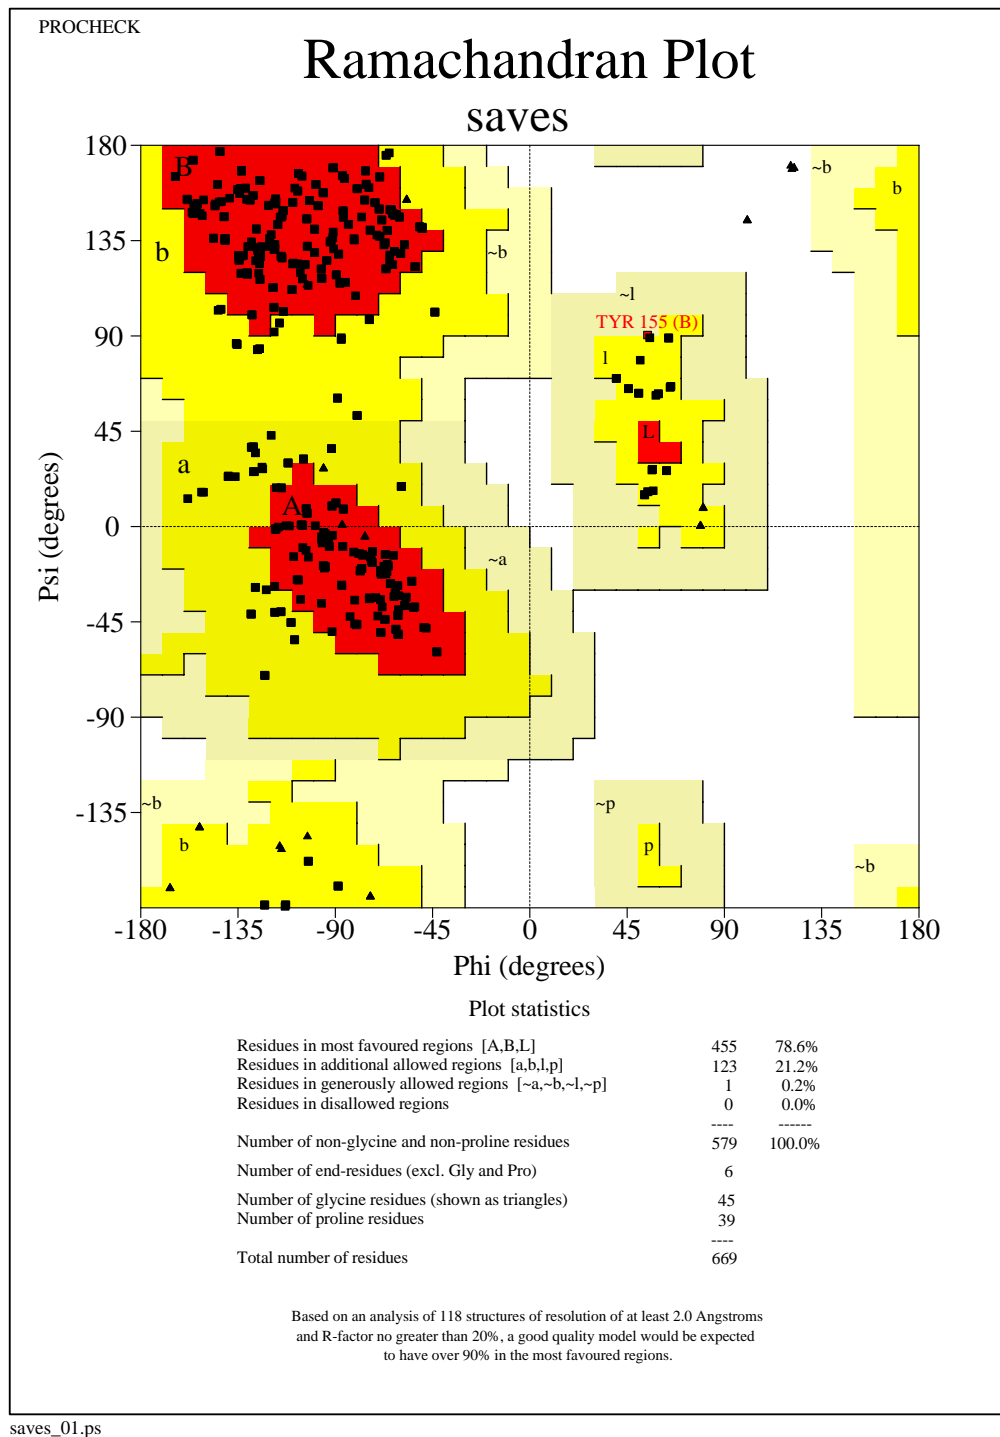

**Supplementary Figure 1(S):** The PROCHECK Ramachandran plot for the validation of the 3D model of Spike RBD of SARS-CoV-2 B.1.617.1(Kappa) variant (EPI\_ISL\_1357699)

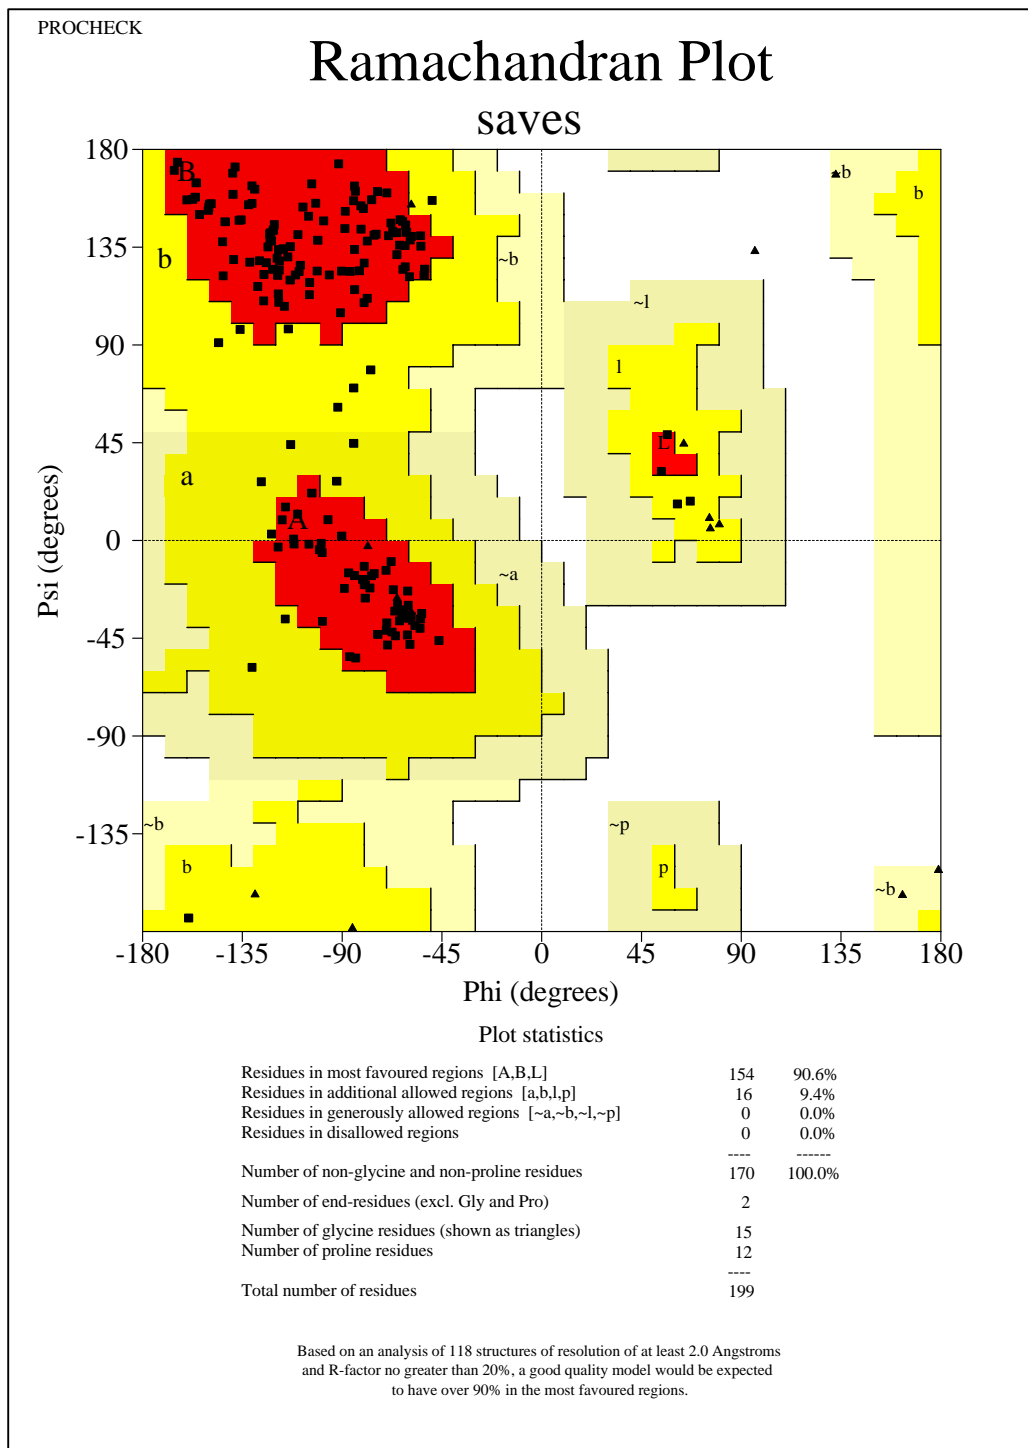

**Supplementary Figure 1(T):** The PROCHECK Ramachandran plot for the validation of the 3D model of Spike RBD of SARS-CoV-2 B.1.1.523 variant (EPI\_ISL\_1448584)

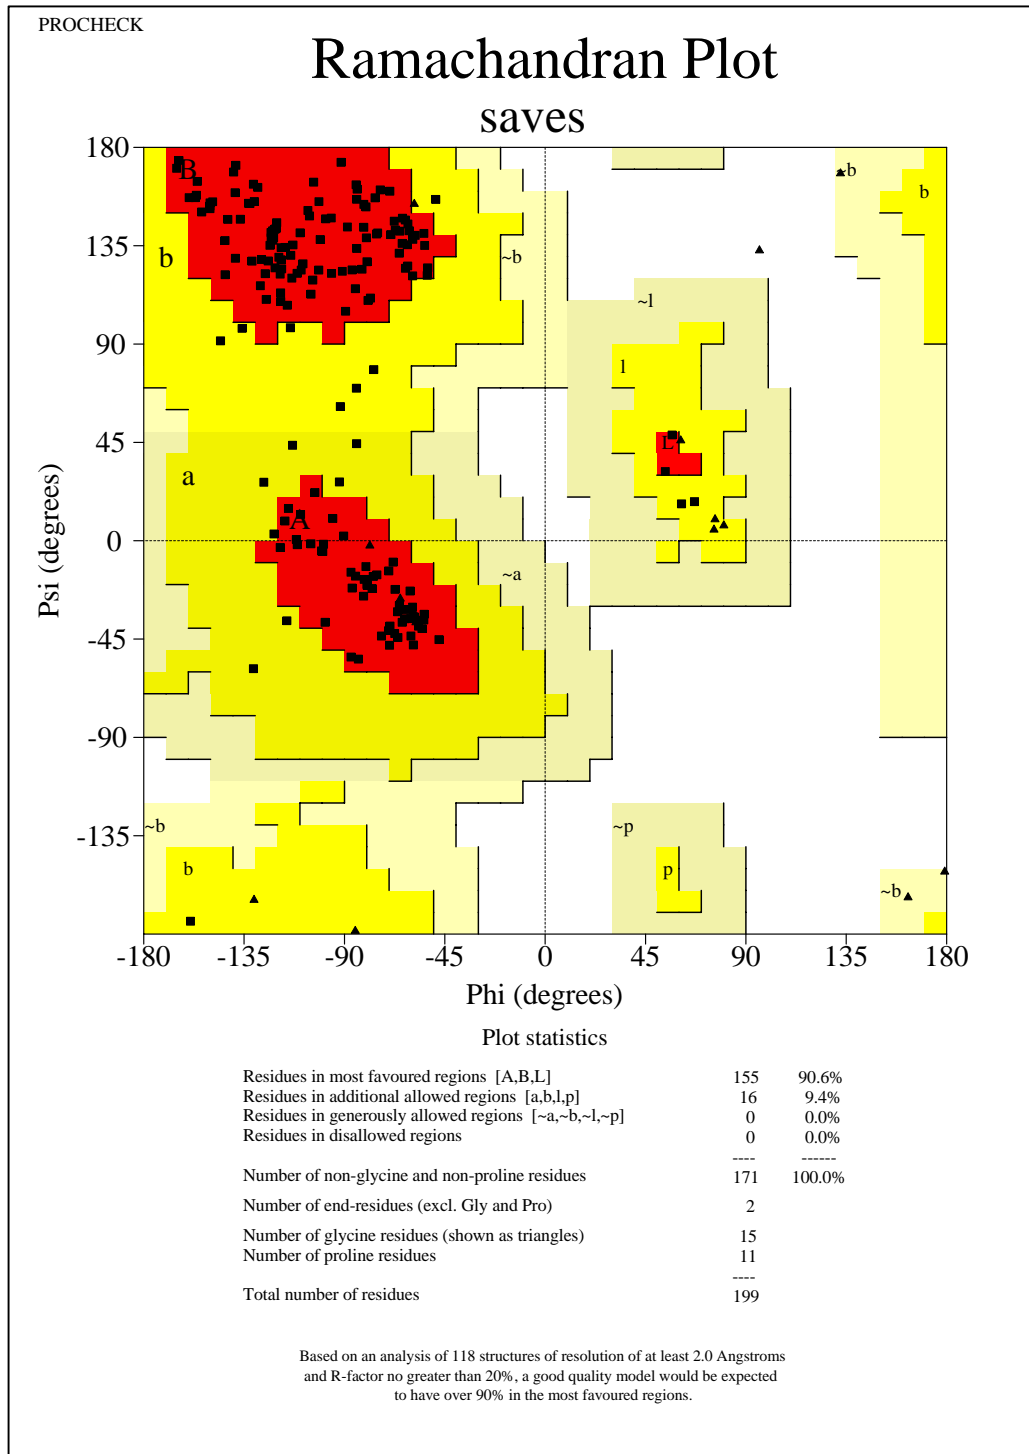

**Supplementary Figure 1(U):** The PROCHECK Ramachandran plot for the validation of the 3D model of Spike RBD of SARS-CoV-2 B.1.620 variant (EPI\_ISL\_1579527)

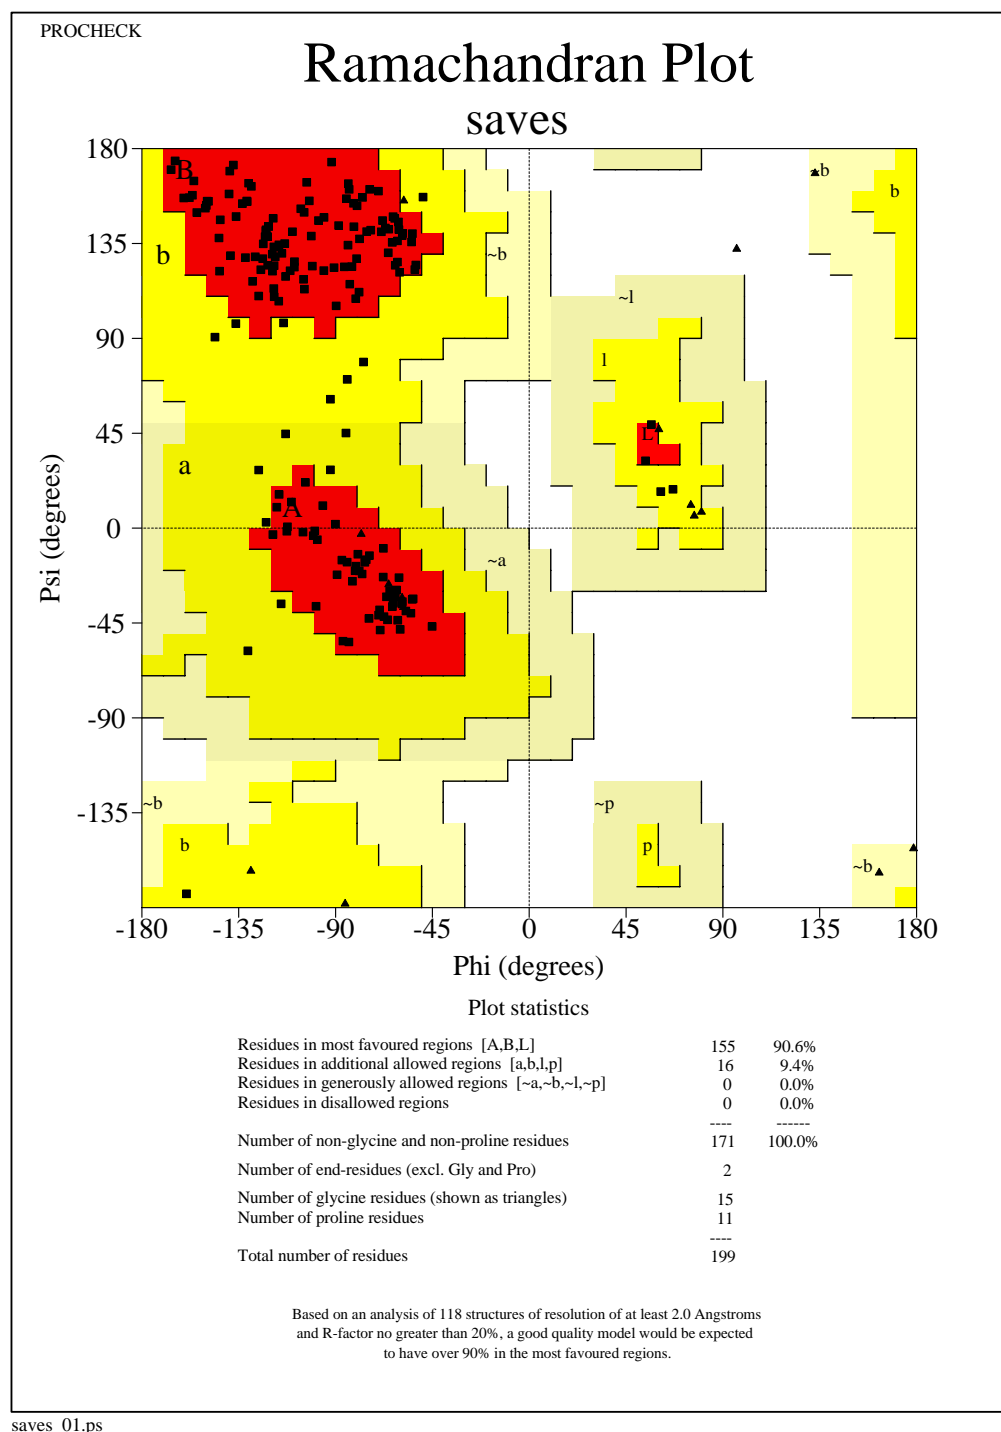

**Supplementary Figure 1(V):** The PROCHECK Ramachandran plot for the validation of the 3D model of Spike RBD of SARS-CoV-2 AV.1 variant (EPI\_ISL\_1595332)



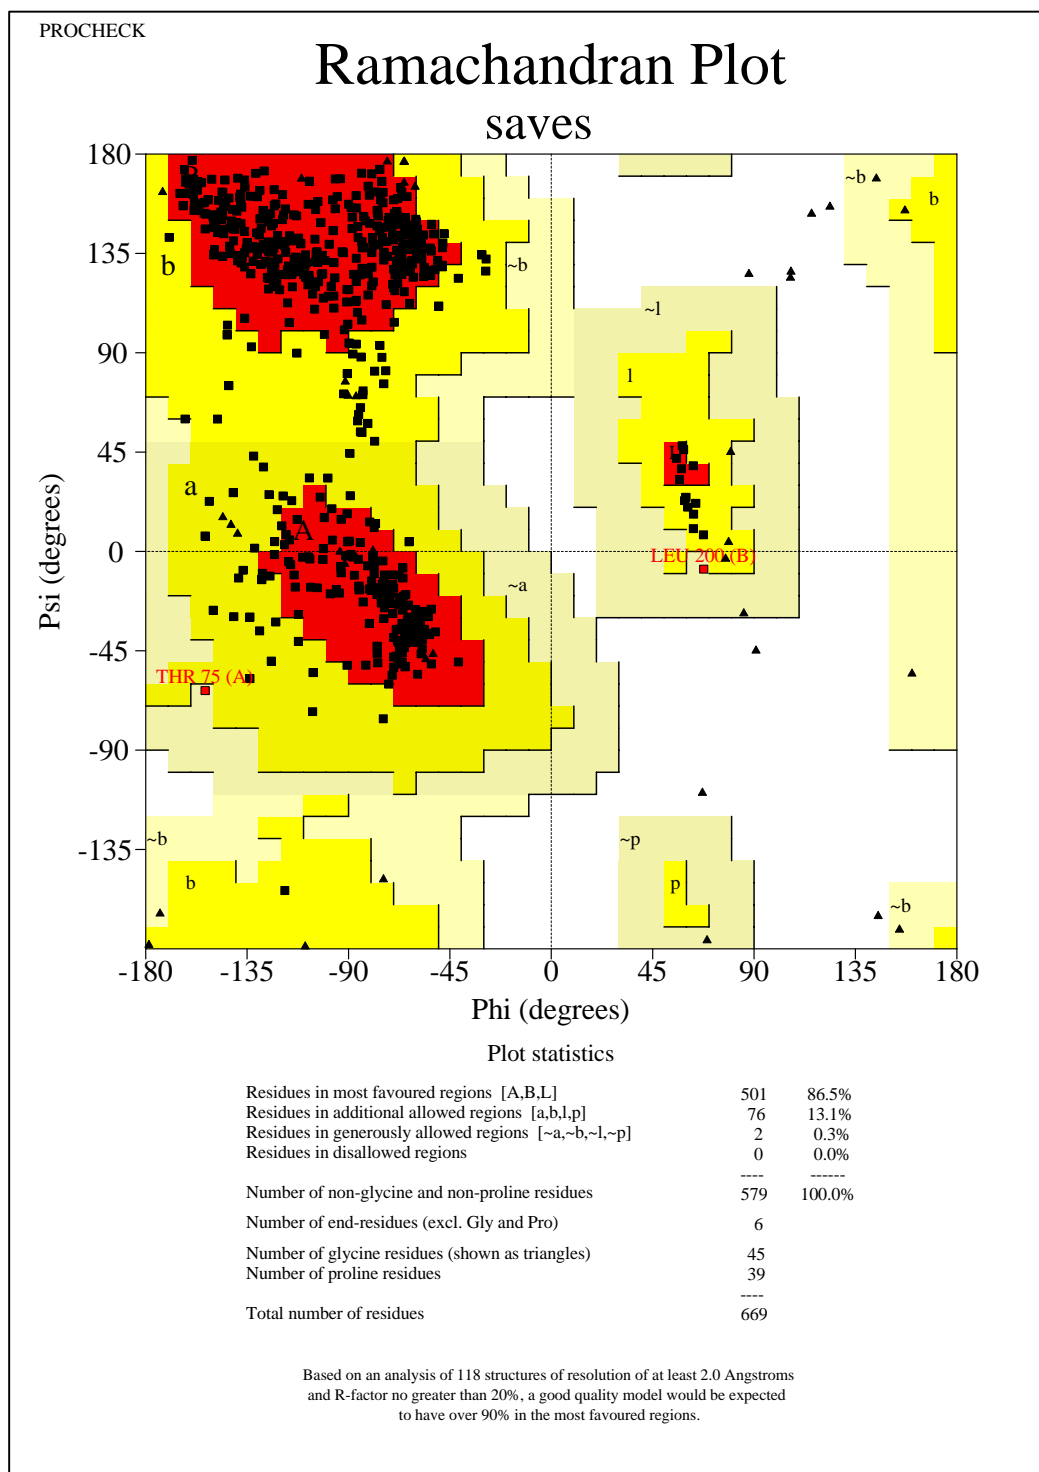

**Supplementary Figure 1(W):** The PROCHECK Ramachandran plot for the validation of the 3D model of Spike RBD of SARS-CoV-2 B.1.630 variant (EPI\_ISL\_3045385)

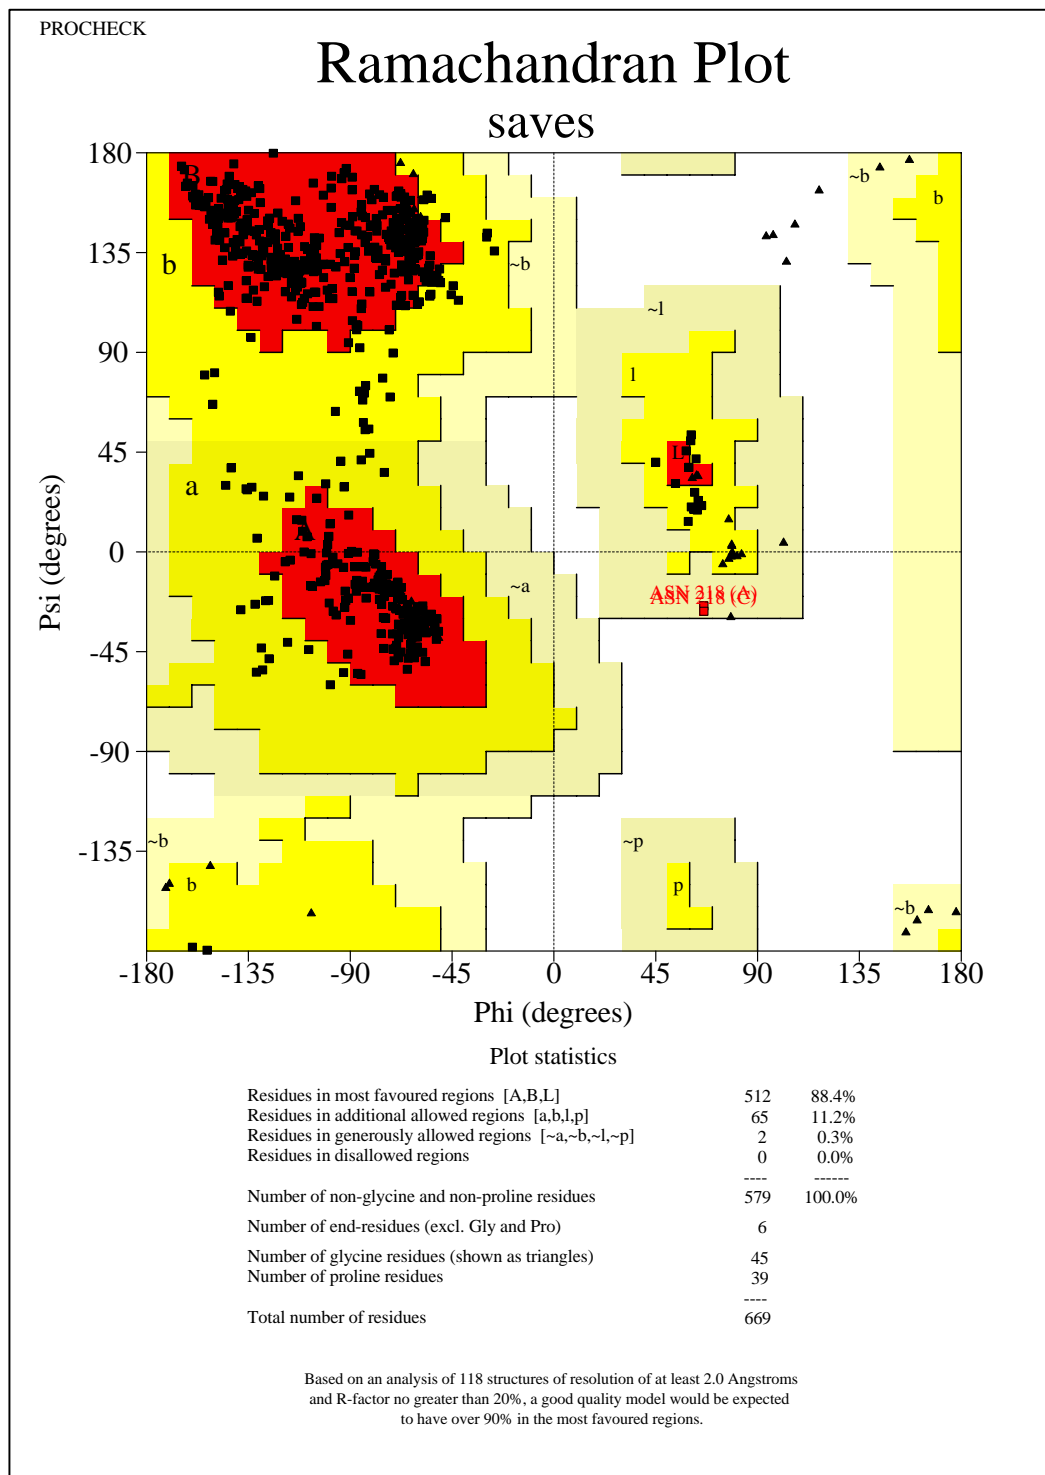

saves\_01.ps

**Supplementary Figure 1(X):** The PROCHECK Ramachandran plot for the validation of the 3D model of Spike RBD of SARS-CoV-2 C.1.2 variant (EPI\_ISL\_3447714)

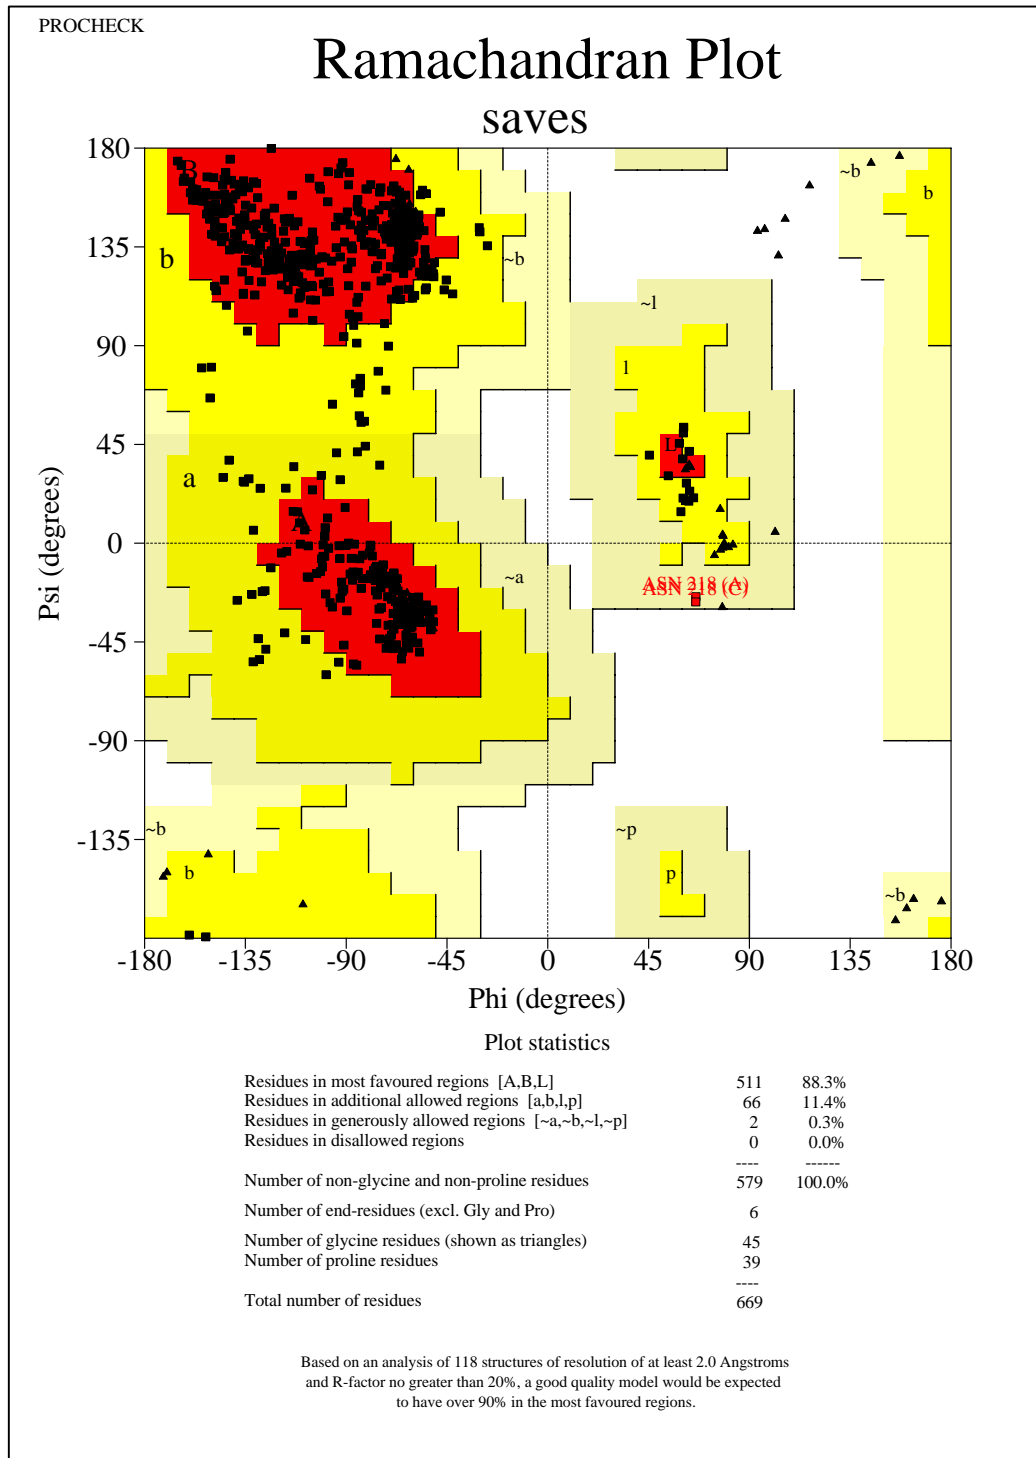

saves\_01.ps

**Supplementary Figure 1(Y):** The PROCHECK Ramachandran plot for the validation of the 3D model of Spike RBD of SARS-CoV-2 B.1.640 variant (EPI\_ISL\_5592661)

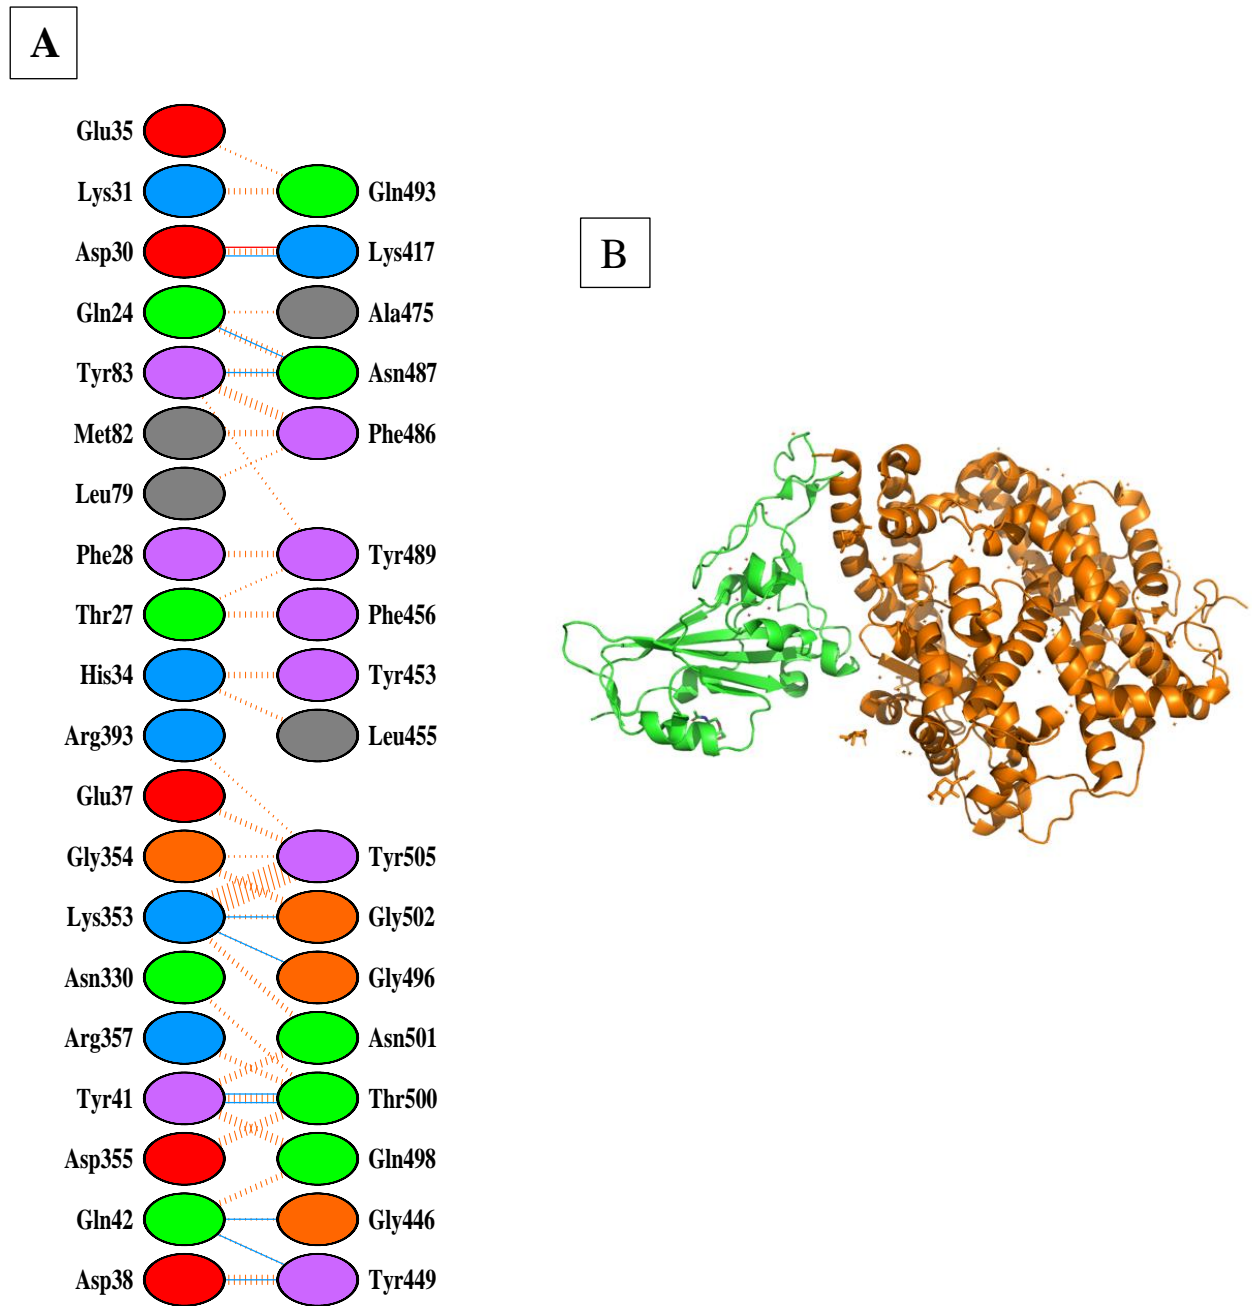

**Supplementary Figure 2A: Protein–protein docking representation of hACE2 and RBD of WIV04(EPI\_ISL\_402124)**. (A) The interaction representation, which includes hydrogen (—), salt bridges (—), and non-bonded (|||) interactions. Chain A represents hACE2 and chain B represents RBD. Residue colors: positive (blue): H,K,R; negative (red): D,E; neutral (green): S,T,N,Q; aliphatic (grey): A,V,L,I,M; aromatic (purple): F,Y,W; Pro & Gly (orange): P,G. (B) The binding interface of hACE2:RBD complex

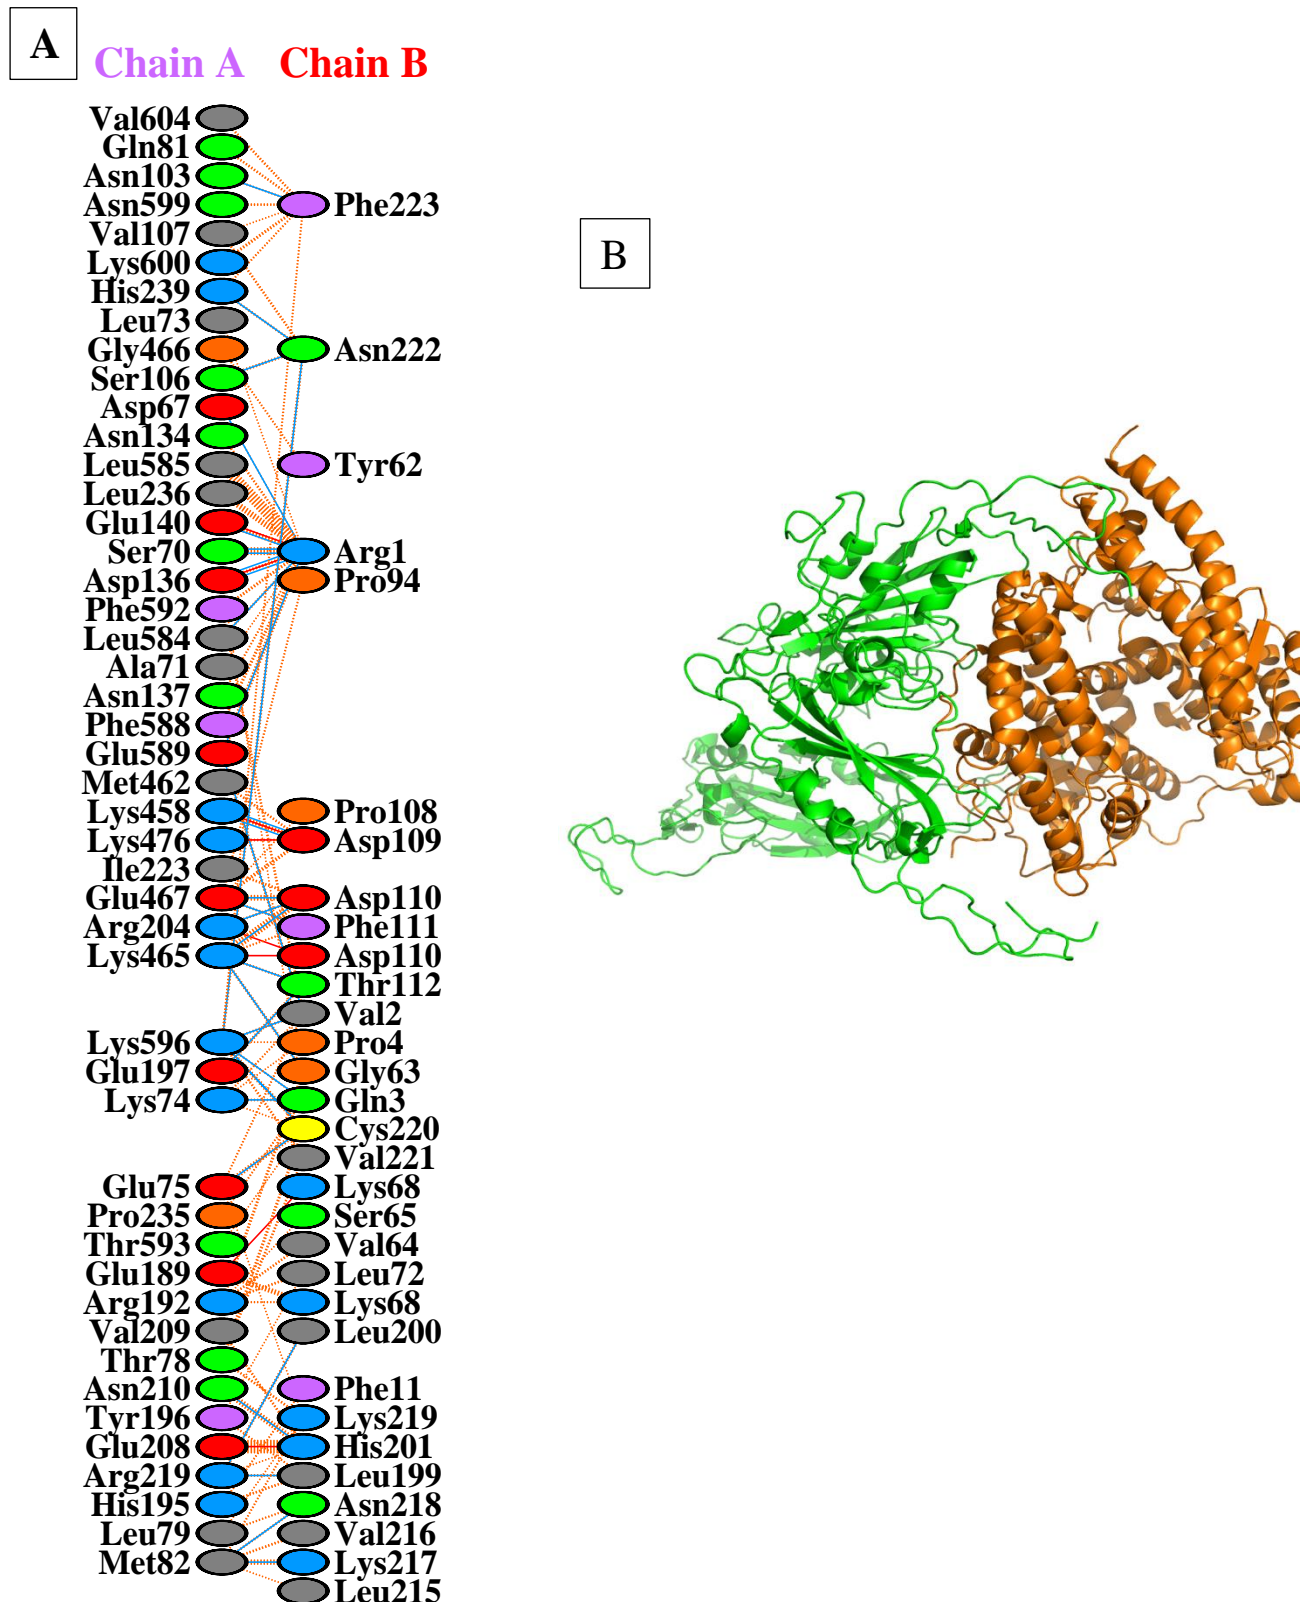

**Supplementary Figure 2B: Protein-protein docking representation of hACE2 and RBD of B.1.1.7(Alpha) (EPI\_ISL\_596982).** (A) The interaction representation, which includes hydrogen ( ——— ), salt bridges ( ——— ), and non-bonded ( ||||| ) interactions. Chain A represents hACE2 and chain B represents RBD. Residue colors: positive (blue): H,K,R; negative (red): D,E; neutral (green): S,T,N,Q; aliphatic (grey): A,V,L,I,M; aromatic (purple): F,Y,W; Pro & Gly (orange): P,G. (B) The binding interface of hACE2:RBD complex

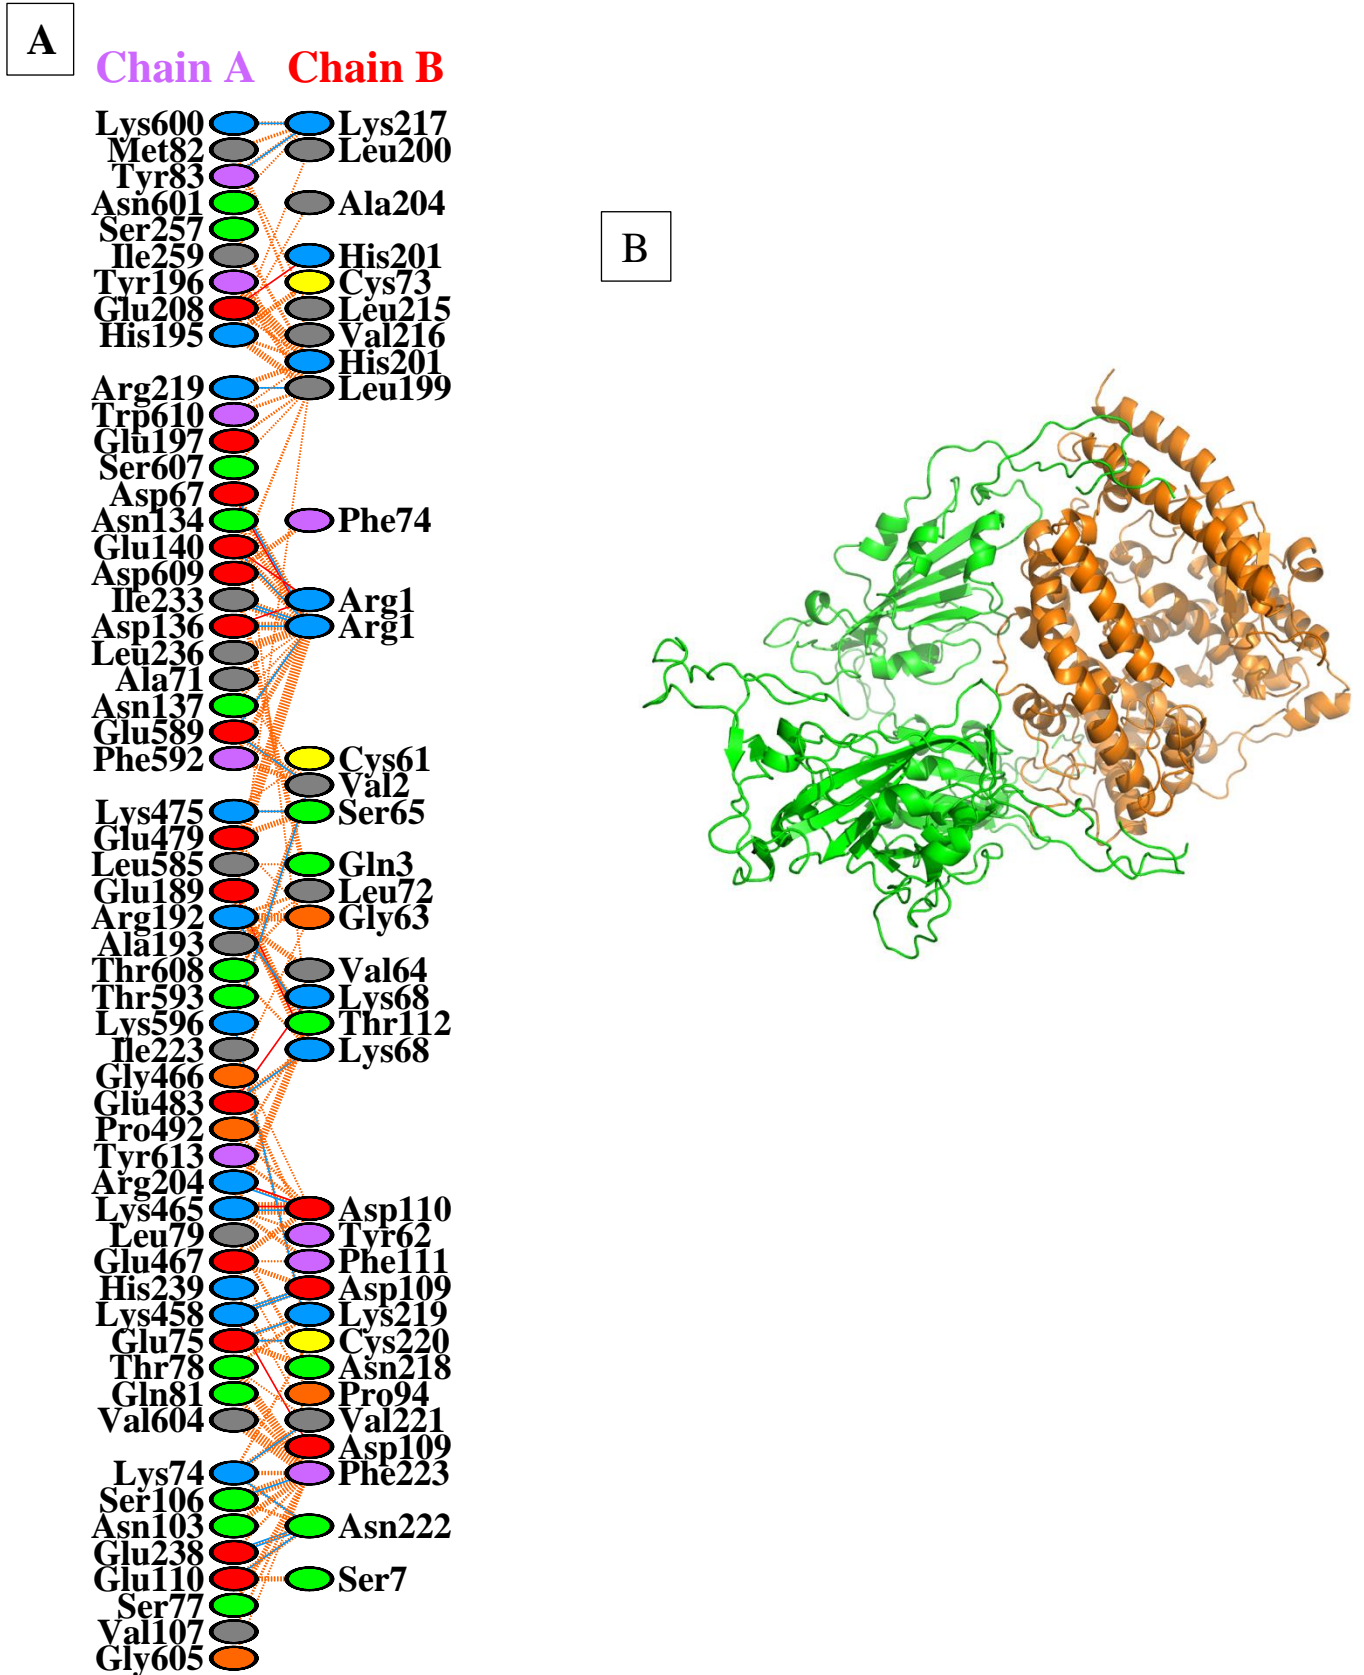

**Supplementary Figure 2C: Protein–protein docking representation of hACE2 and RBD of B.1.351(Beta) (EPI\_ISL\_660629).** (A) The interaction representation, which includes hydrogen (—), salt bridges (—), and non-bonded (|||||) interactions. Chain A represents hACE2 and chain B represents RBD. Residue colors: positive (blue): H,K,R; negative (red): D,E; neutral (green): S,T,N,Q; aliphatic (grey): A,V,L,I,M; aromatic (purple): F,Y,W; Pro & Gly (orange): P,G. (B) The binding interface of hACE2:RBD complex



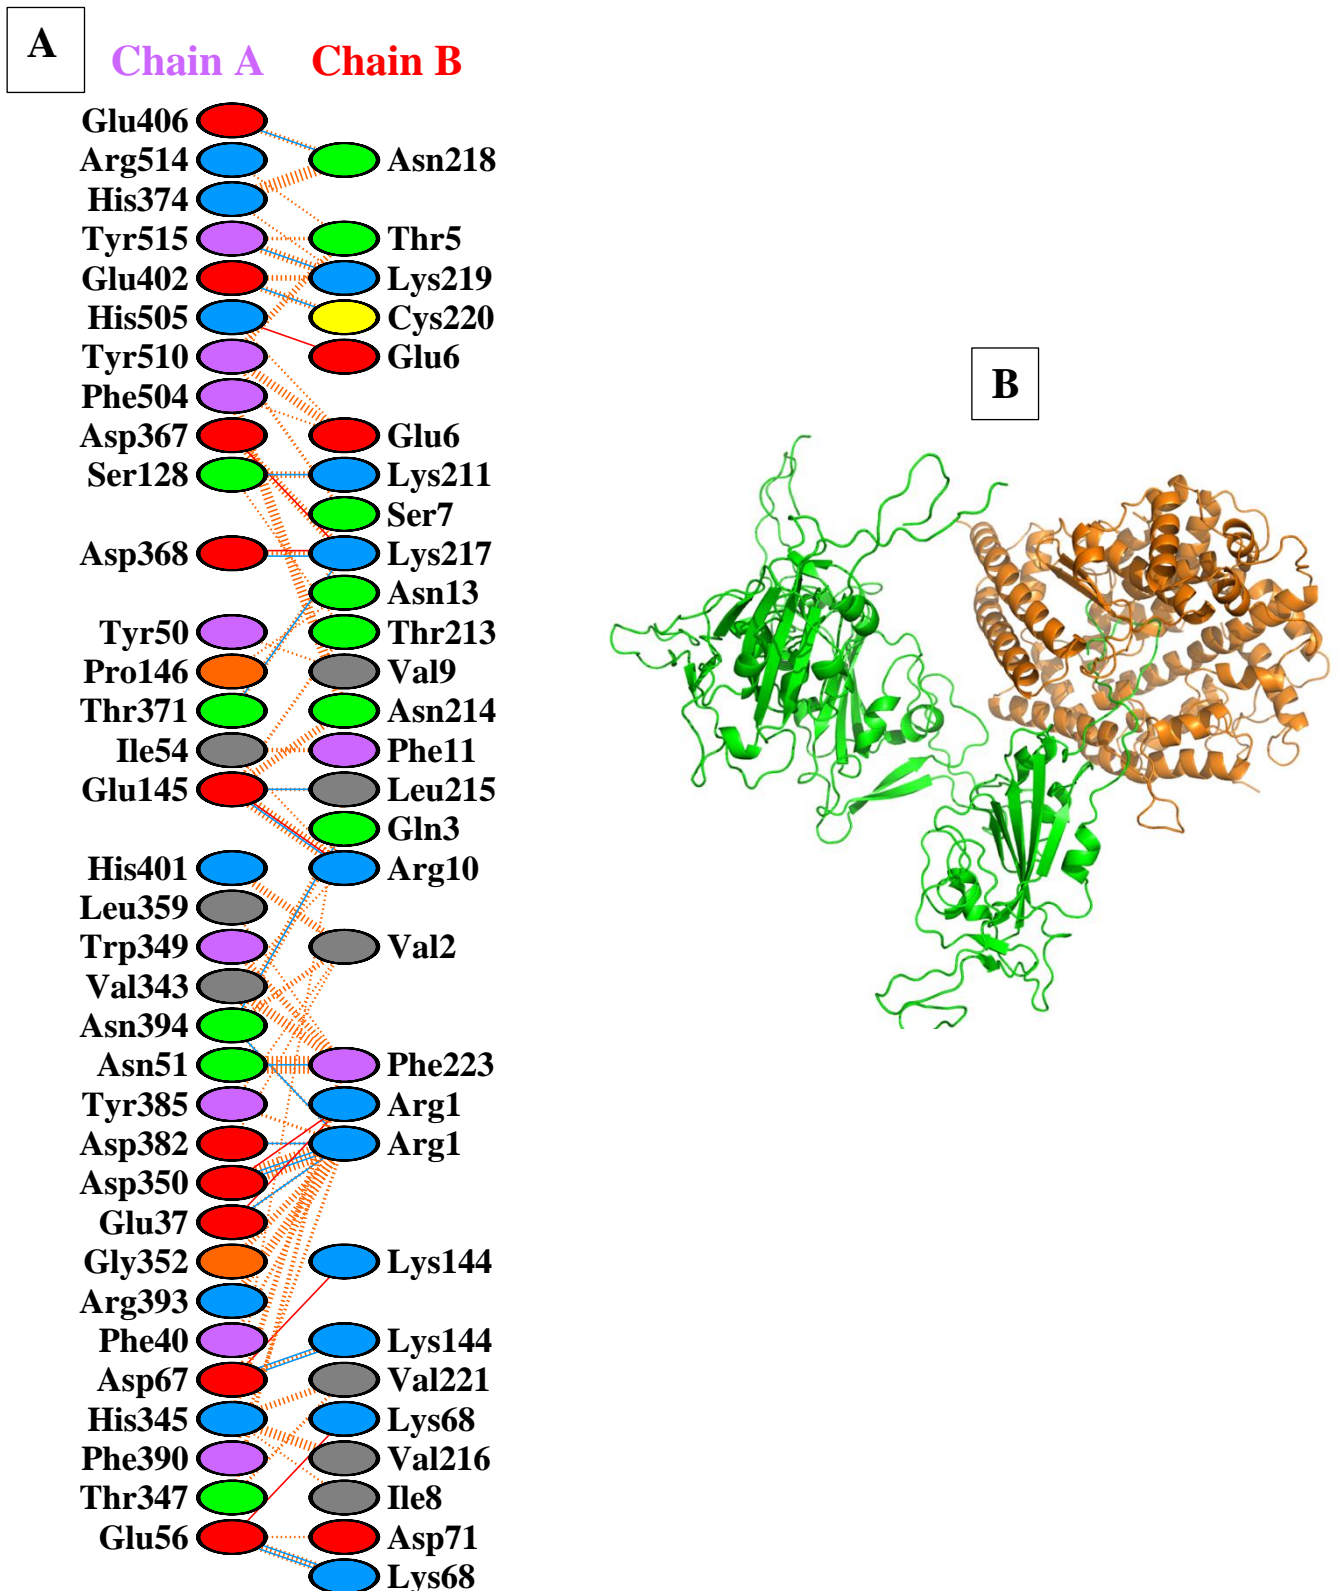

**Supplementary Figure 2D: Protein–protein docking representation of hACE2 and RBD of B.1.1.28.1 (Gamma) (EPI\_ISL\_811149).** (A) The interaction representation, which includes hydrogen (—), salt bridges (—), and non-bonded (|||||) interactions. Chain A represents hACE2 and chain B represents RBD. Residue colors: positive (blue): H,K,R; negative (red): D,E; neutral (green): S,T,N,Q; aliphatic (grey): A,V,L,I,M; aromatic (purple): F,Y,W; Pro & Gly (orange): P,G. (B) The binding interface of hACE2:RBD complex

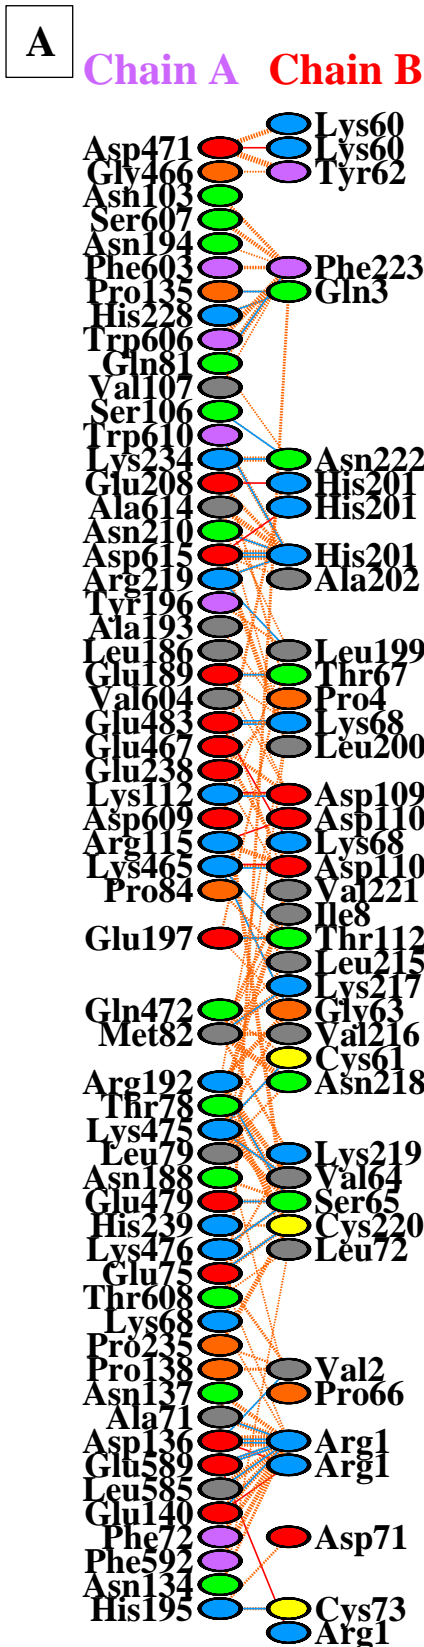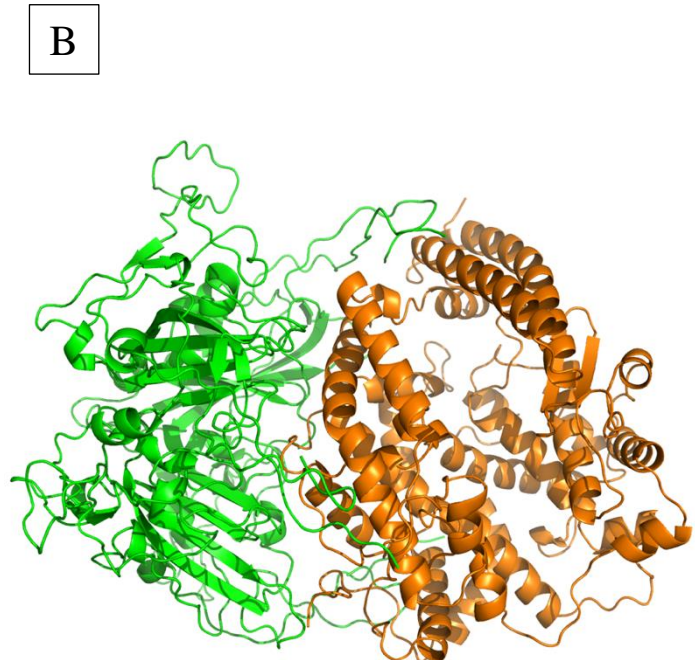

**Supplementary Figure 2E: Protein–protein docking representation of hACE2 and RBD of B.1.617(Delta) (EPI\_ISL\_1360328).** (A) The interaction representation, which includes hydrogen (—), salt bridges (—), and non-bonded (|||||) interactions. Chain A represents hACE2 and chain B represents RBD. Residue colors: positive (blue): H,K,R; negative (red): D,E; neutral (green): S,T,N,Q; aliphatic (grey): A,V,L,I,M; aromatic (purple): F,Y,W; Pro & Gly (orange): P,G. (B) The binding interface of hACE2:RBD complex



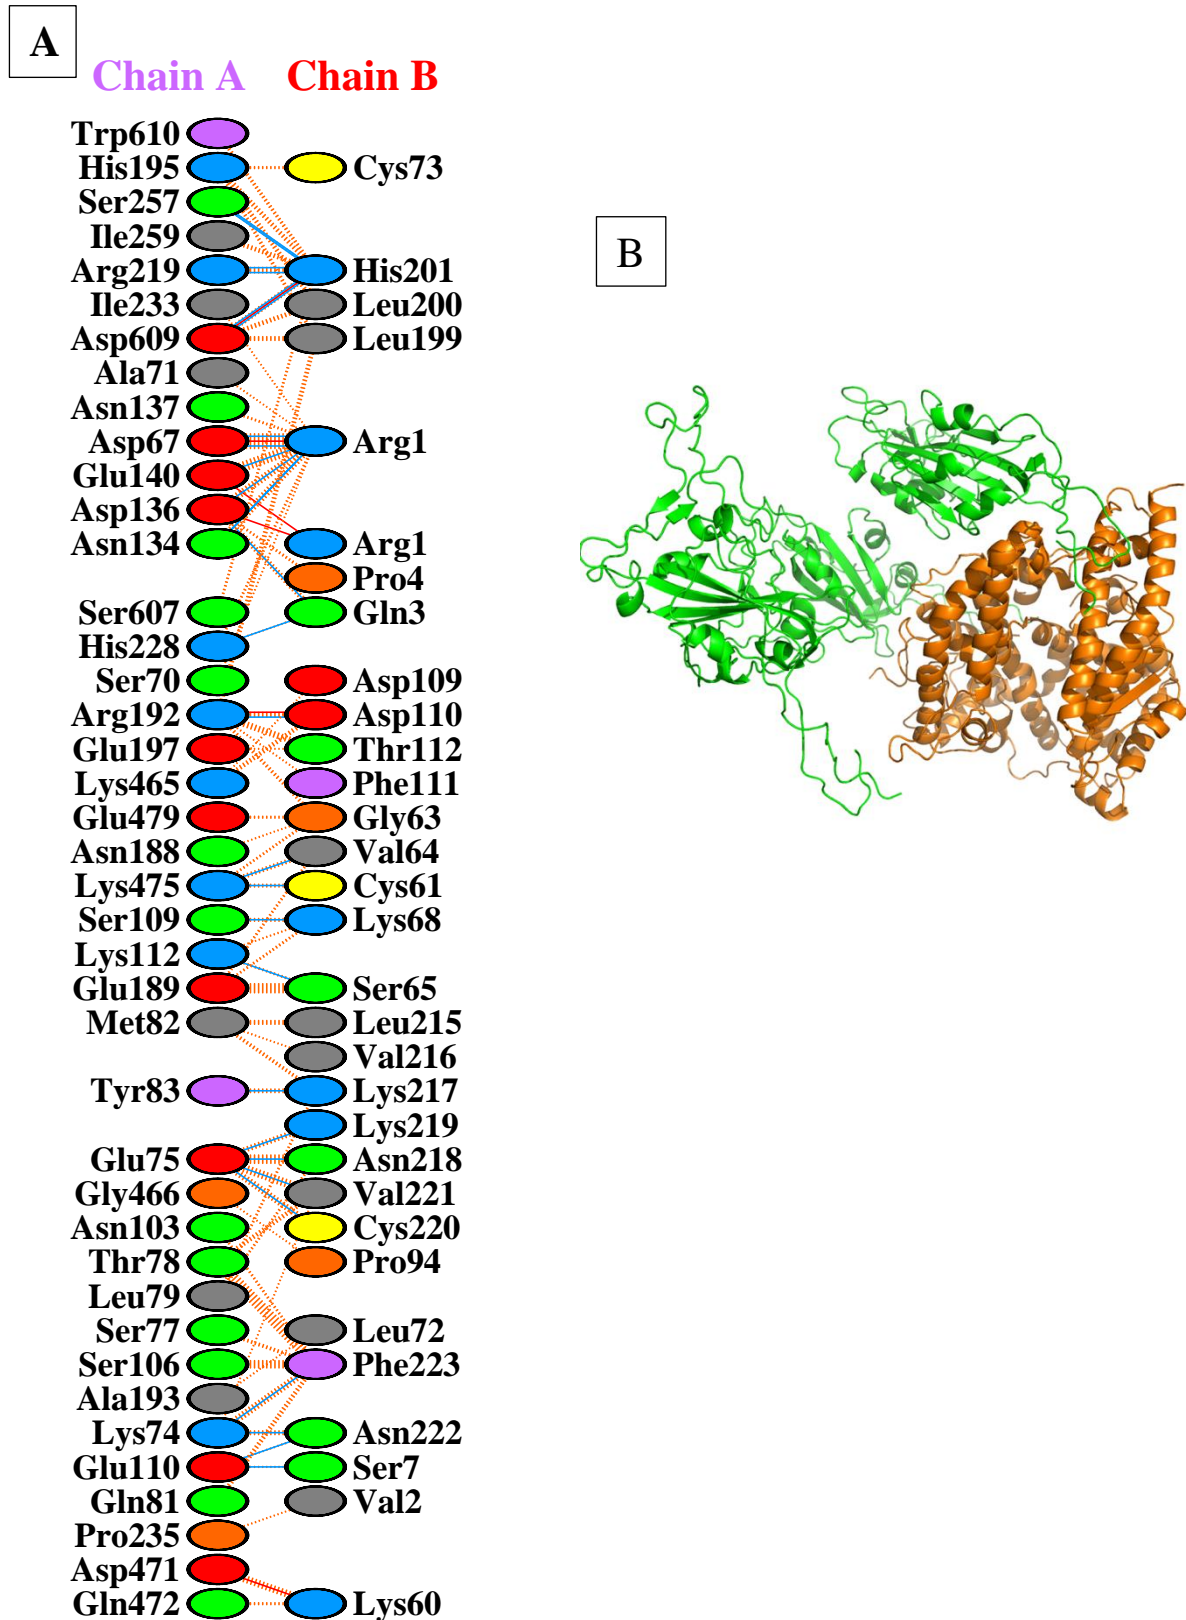

**Supplementary Figure 2F: Protein–protein docking representation of hACE2 and RBD of B.1.1.529 (Omicron) (EPI\_ISL\_6640917).** (A) The interaction representation, which includes hydrogen (—), salt bridges (—), and non-bonded (|||||) interactions. Chain A represents hACE2 and chain B represents RBD. Residue colors: positive (blue): H,K,R; negative (red): D,E; neutral (green): S,T,N,Q; aliphatic (grey): A,V,L,I,M; aromatic (purple): F,Y,W; Pro & Gly (orange): P,G. (B) The binding interface of hACE2:RBD complex

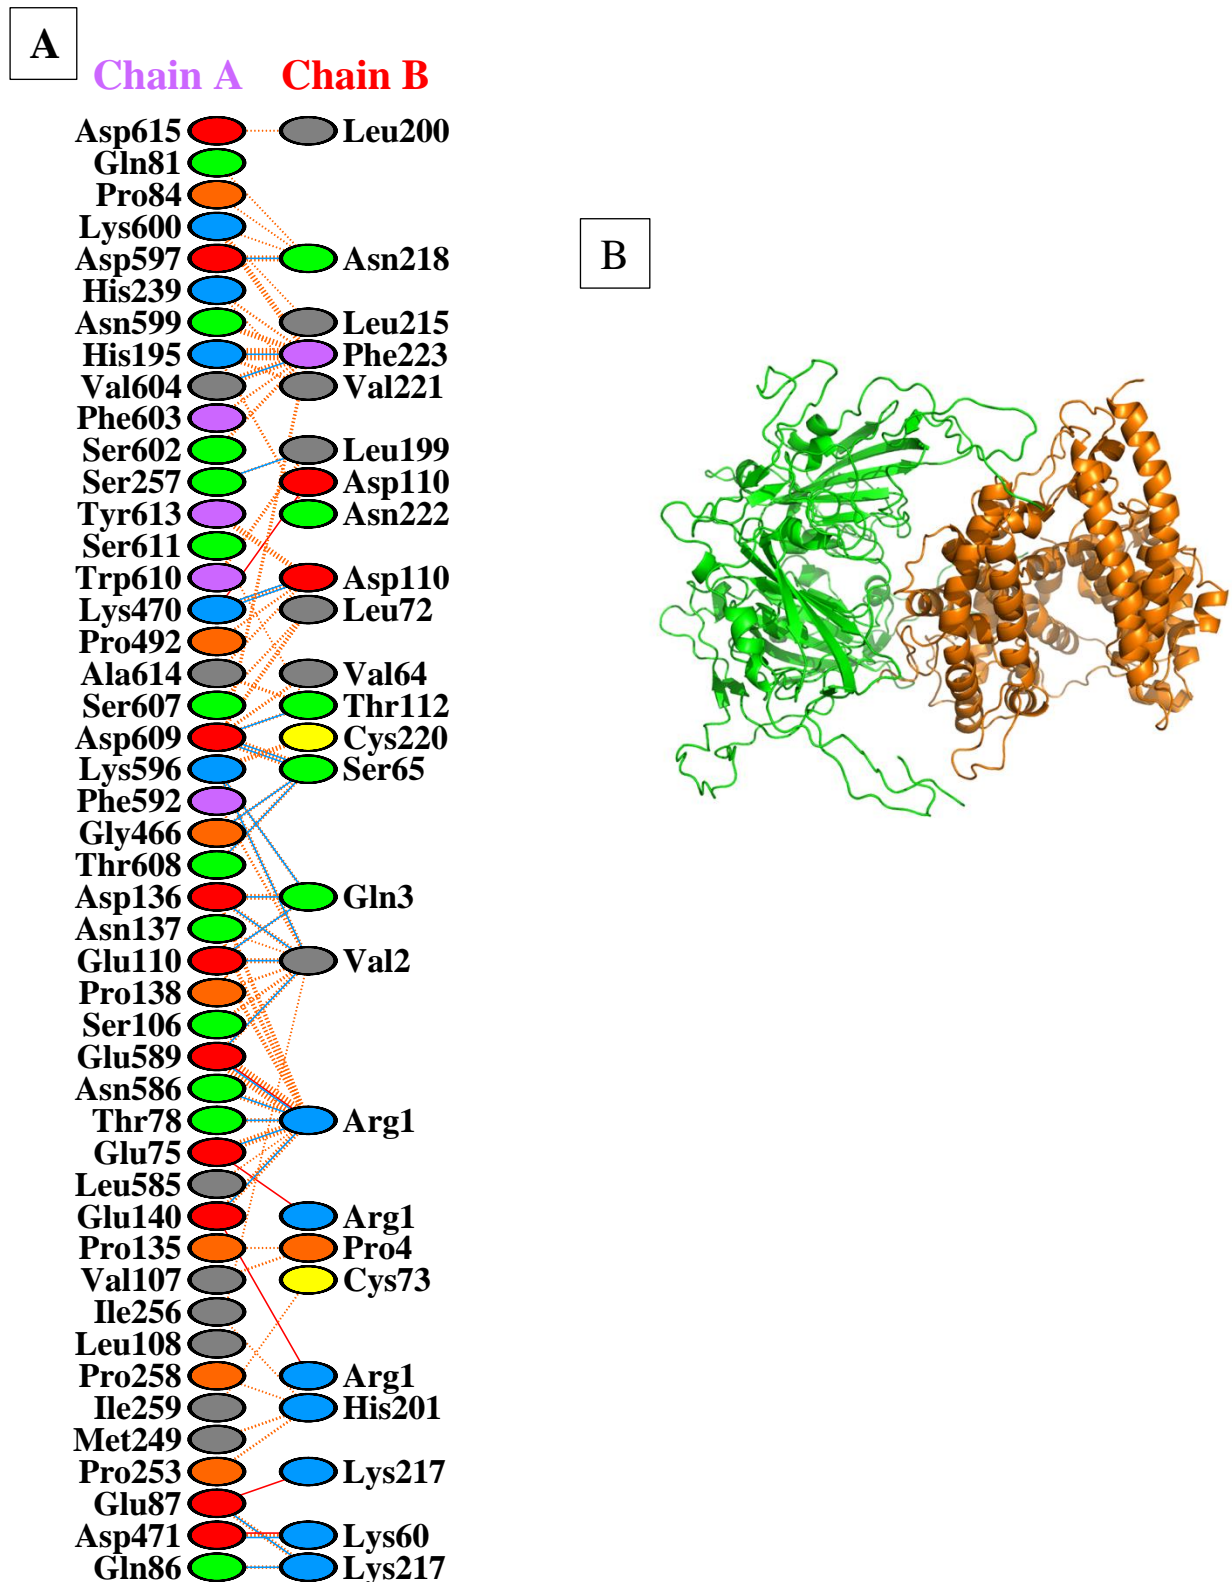

**Supplementary Figure 2G: Protein–protein docking representation of hACE2 and RBD of C.37(Lambda) (EPI\_ISL\_1111334).** (A) The interaction representation, which includes hydrogen (—), salt bridges (—), and non-bonded (|||||) interactions. Chain A represents hACE2 and chain B represents RBD. Residue colors: positive (blue): H,K,R; negative (red): D,E; neutral (green): S,T,N,Q; aliphatic (grey): A,V,L,I,M; aromatic (purple): F,Y,W; Pro & Gly (orange): P,G. (B) The binding interface of hACE2:RBD complex

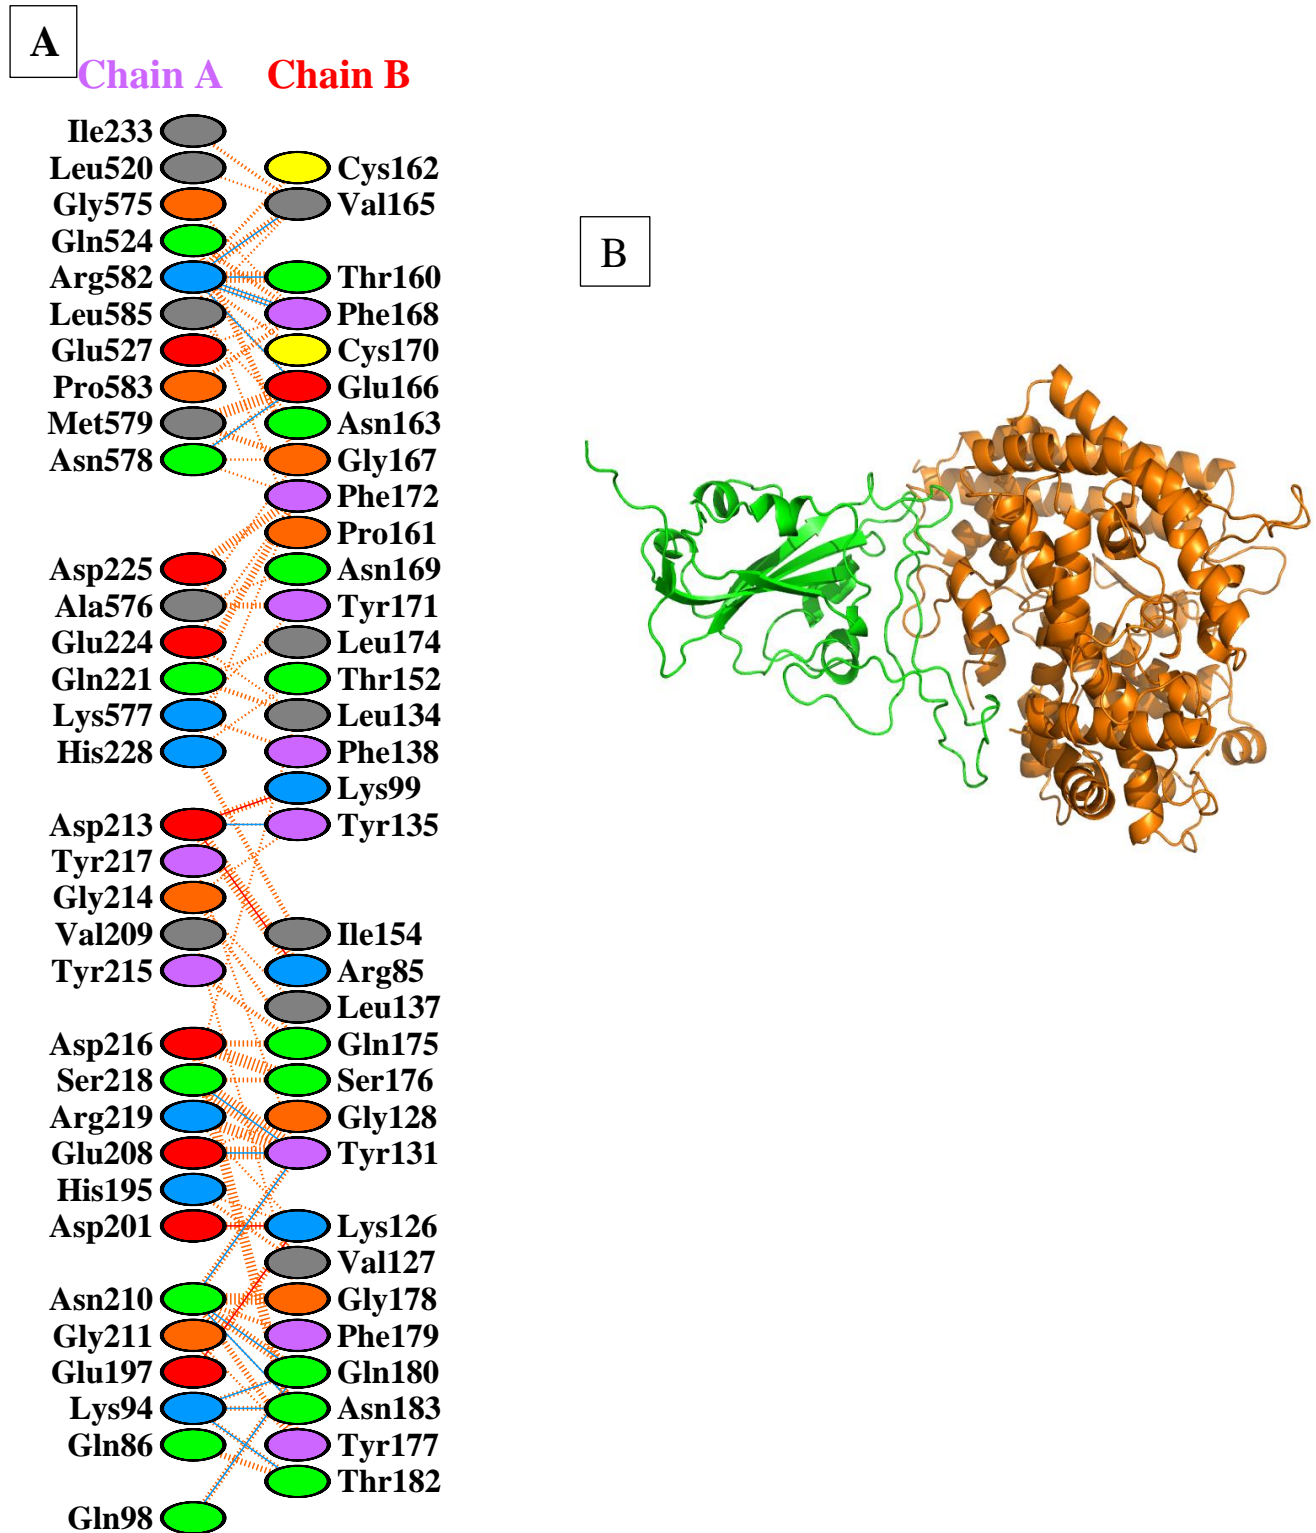

**Supplementary Figure 2H: Protein–protein docking representation of hACE2 and RBD of B.1.621(Mu) (EPI\_ISL\_3369952).** (A) The interaction representation, which includes hydrogen (—), salt bridges (—), and non-bonded (|||||) interactions. Chain A represents hACE2 and chain B represents RBD. Residue colors: positive (blue): H,K,R; negative (red): D,E; neutral (green): S,T,N,Q; aliphatic (grey): A,V,L,I,M; aromatic (purple): F,Y,W; Pro & Gly (orange): P,G. (B) The binding interface of hACE2:RBD complex

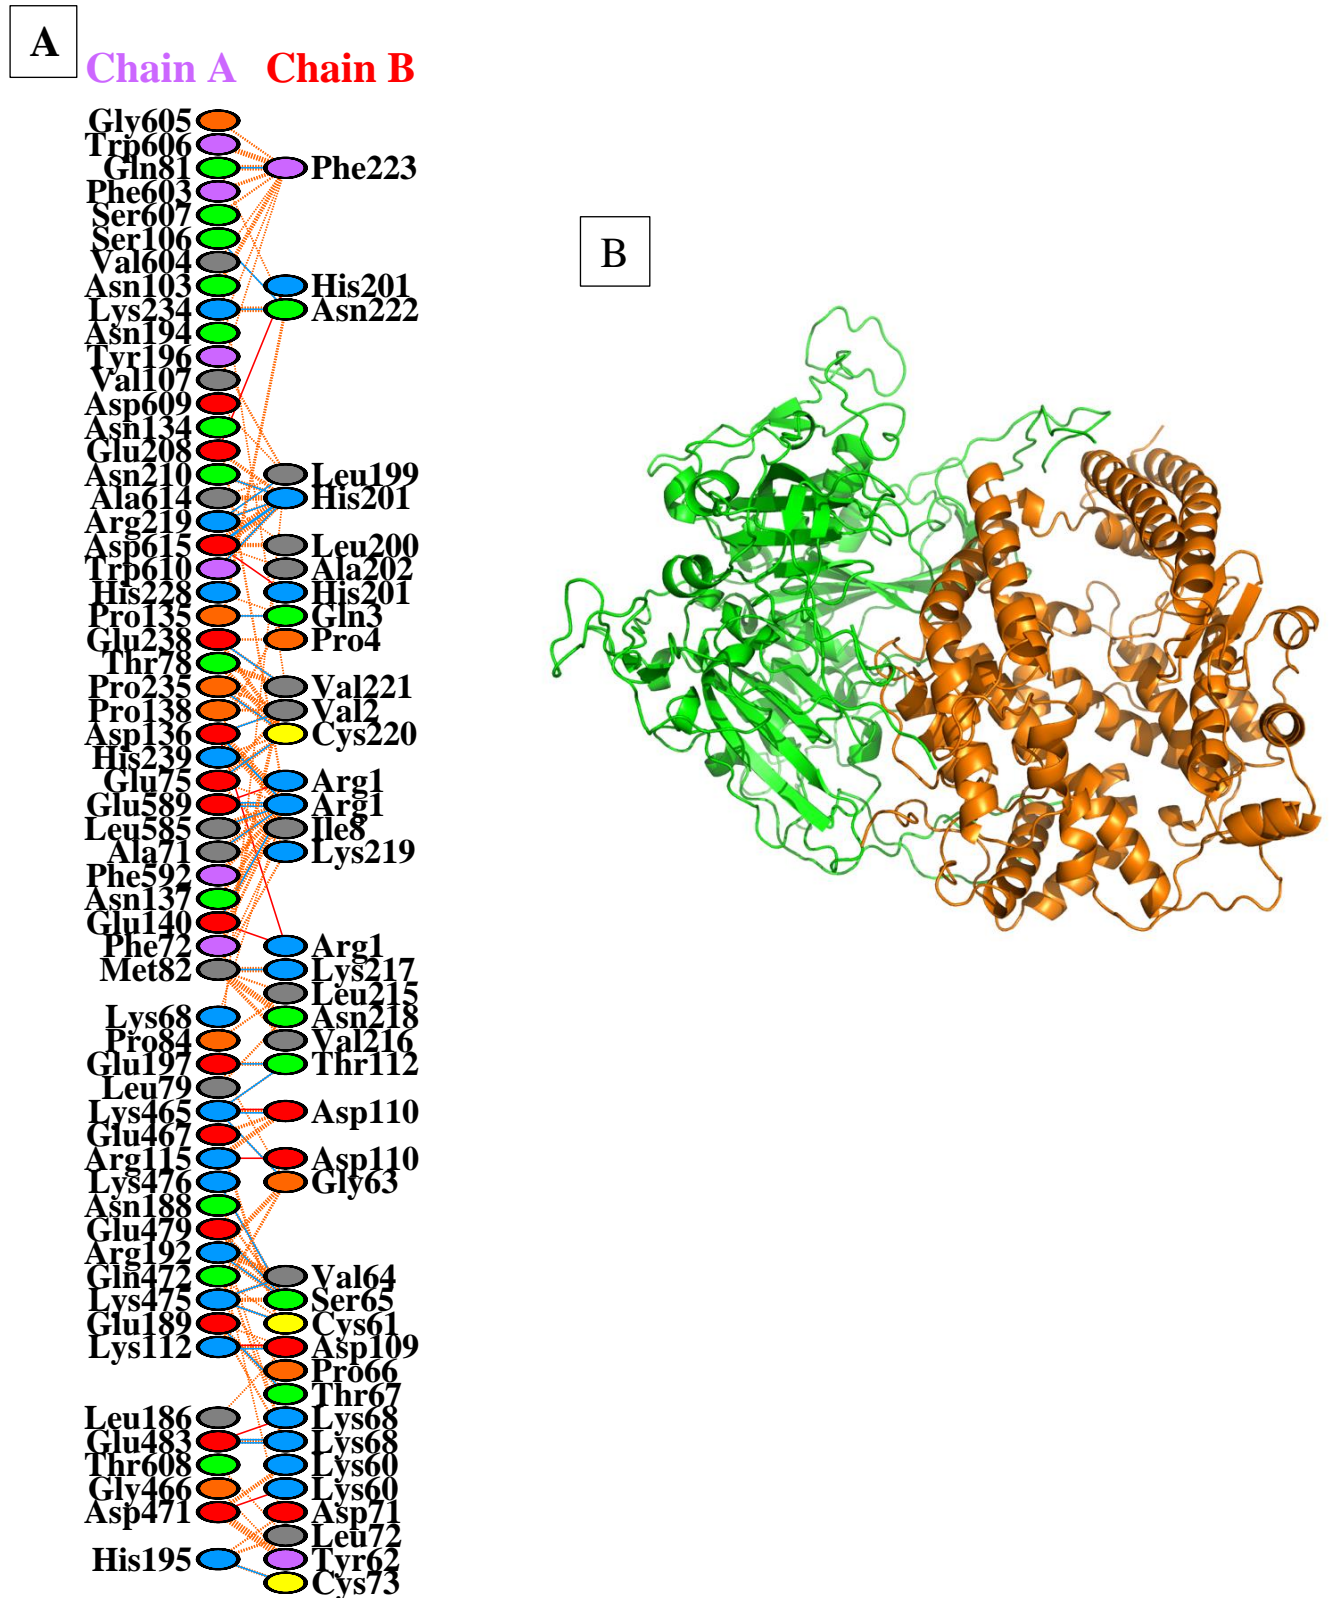

**Supplementary Figure 2I: Protein–protein docking representation of hACE2 and RBD of B.1.427/B.1.429 (Epsilon) (EPI\_ISL\_648527).** (A) The interaction representation, which includes hydrogen (—), salt bridges (—), and non-bonded (|||||) interactions. Chain A represents hACE2 and chain B represents RBD. Residue colors: positive (blue): H,K,R; negative (red): D,E; neutral (green): S,T,N,Q; aliphatic (grey): A,V,L,I,M; aromatic (purple): F,Y,W; Pro & Gly (orange): P,G. (B) The binding interface of hACE2:RBD complex



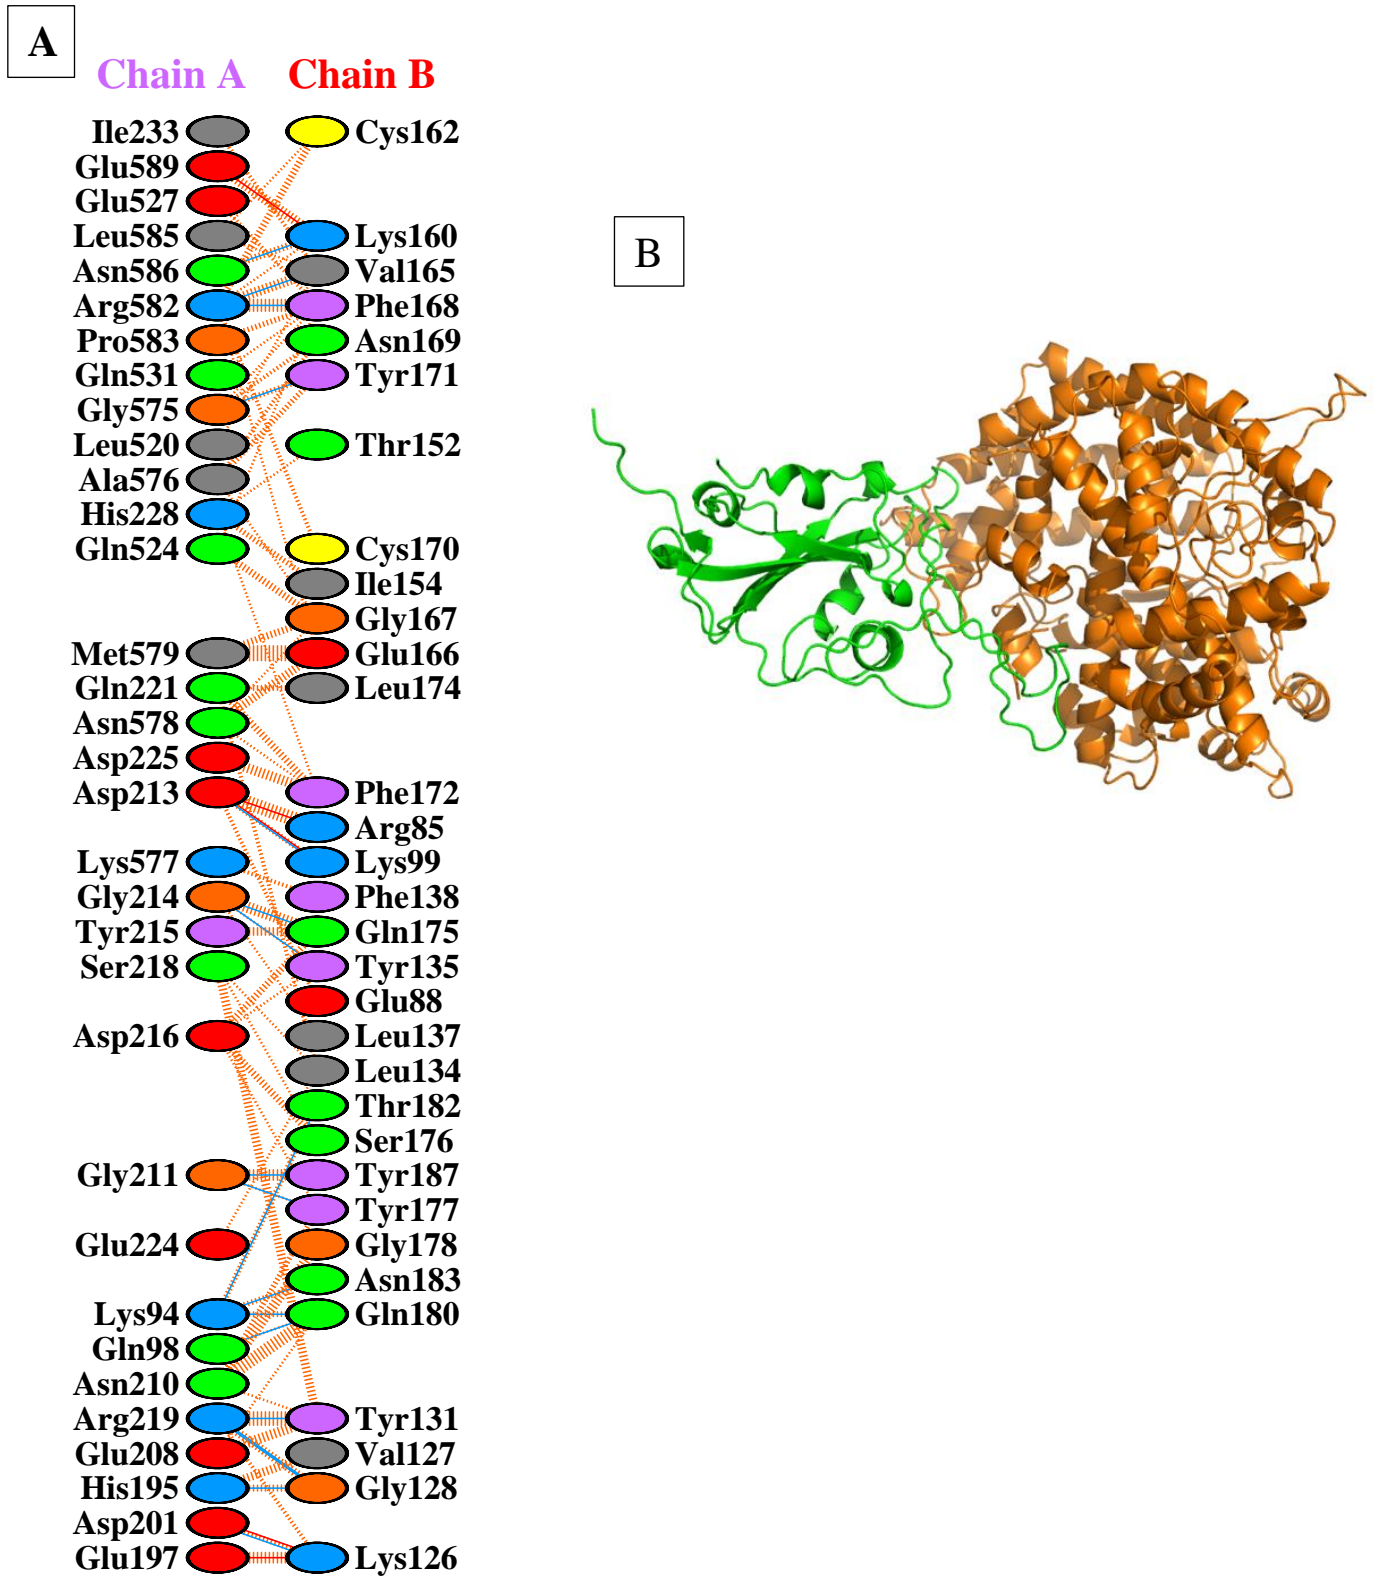

**Supplementary Figure 2J: Protein–protein docking representation of hACE2 and RBD of B.1.1.519 (EPI\_ISL\_721617).**

(A) The interaction representation, which includes hydrogen (—), salt bridges (—), and non-bonded (|||||) interactions. Chain A represents hACE2 and chain B represents RBD. Residue colors: positive (blue): H,K,R; negative (red): D,E; neutral (green): S,T,N,Q; aliphatic (grey): A,V,L,I,M; aromatic (purple): F,Y,W; Pro & Gly (orange): P,G. (B) The binding interface of hACE2:RBD complex

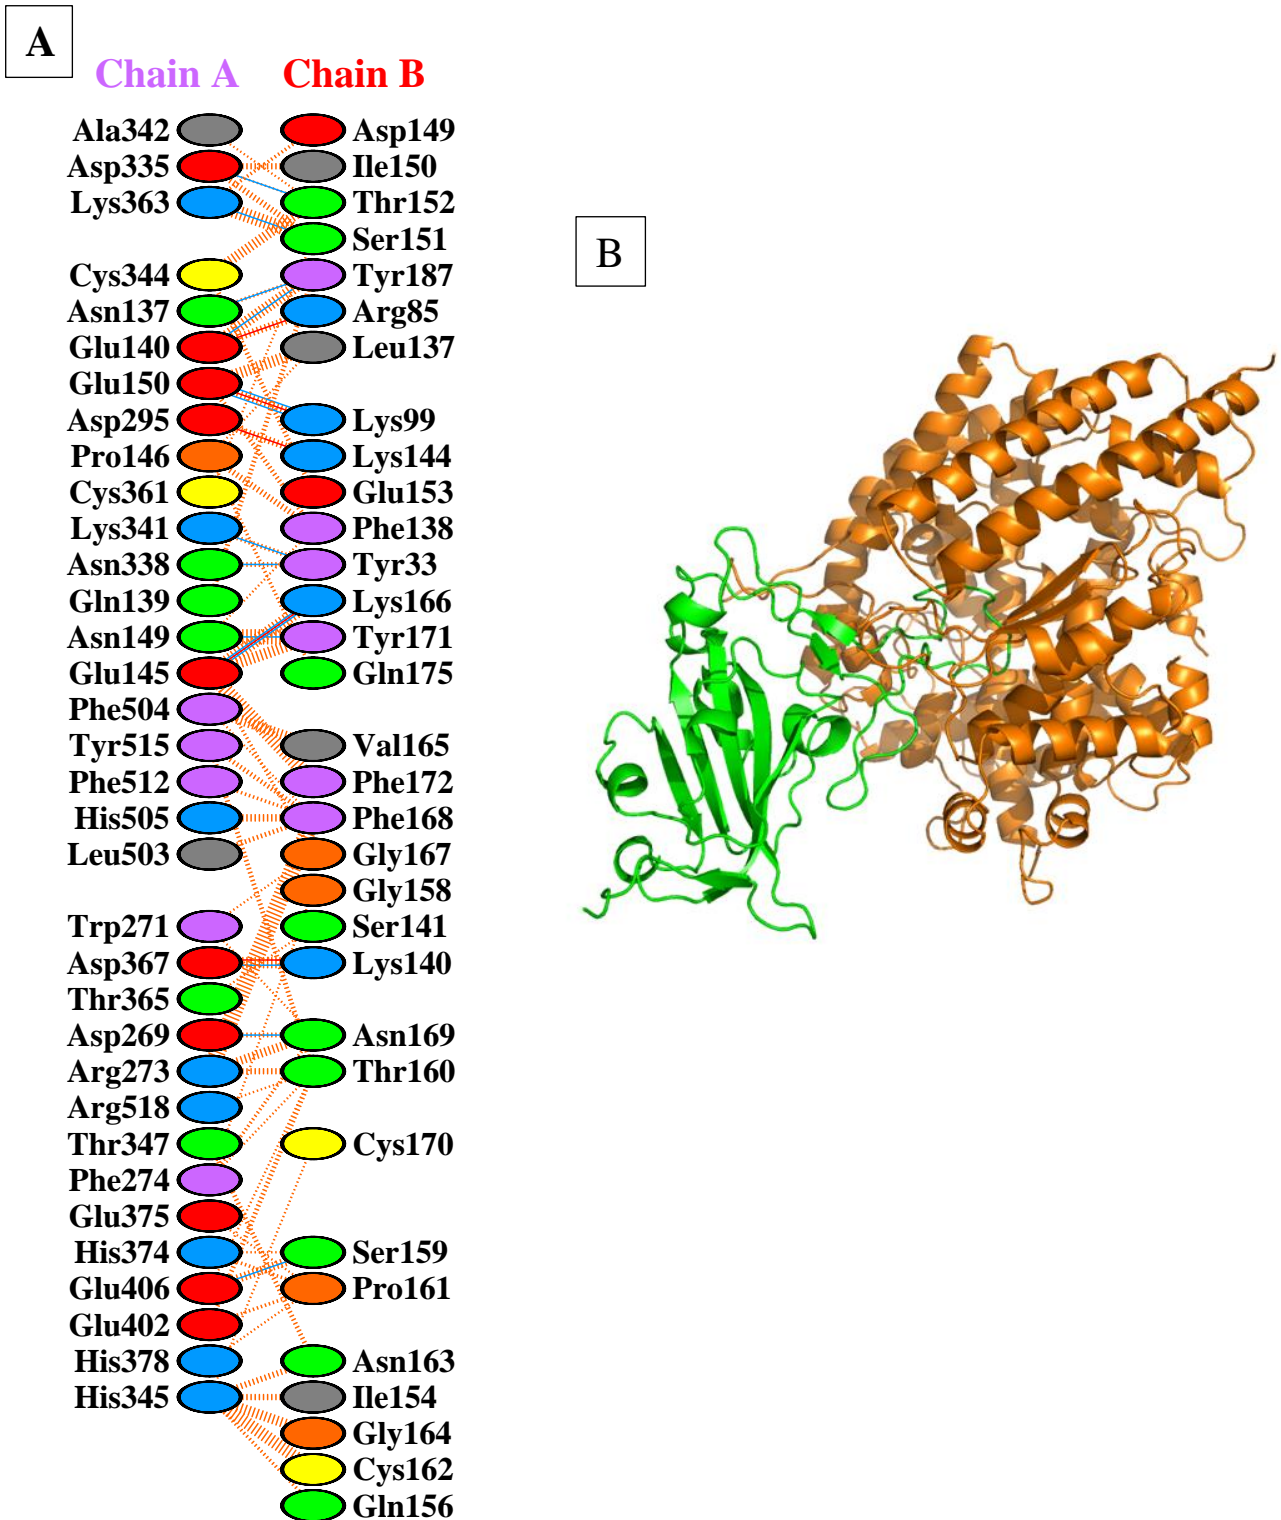

**Supplementary Figure 2K: Protein–protein docking representation of hACE2 and RBD of R.1 (EPI\_ISL\_736897).** (A) The interaction representation, which includes hydrogen (—), salt bridges (—), and non-bonded (|||||) interactions. Chain A represents hACE2 and chain B represents RBD. Residue colors: positive (blue): H,K,R; negative (red): D,E; neutral (green): S,T,N,Q; aliphatic (grey): A,V,L,I,M; aromatic (purple): F,Y,W; Pro & Gly (orange): P,G. (B) The binding interface of hACE2:RBD complex

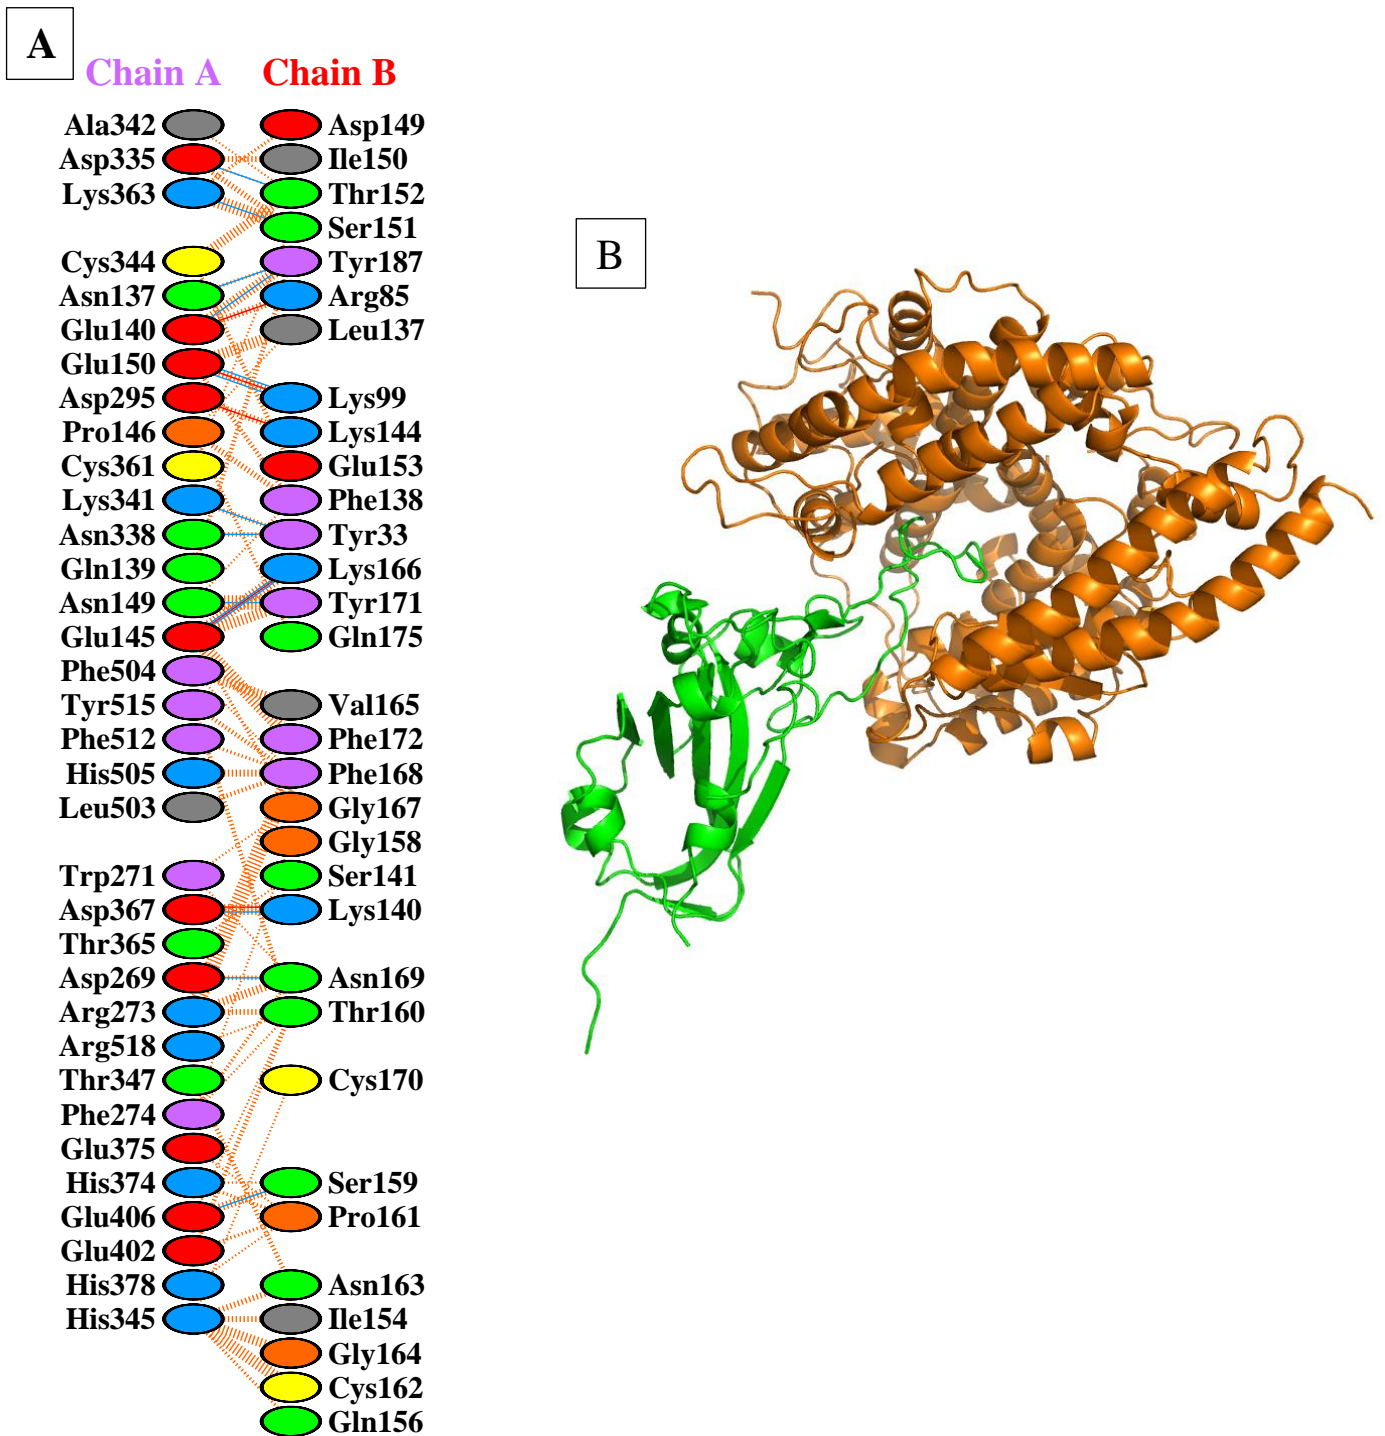

**Supplementary Figure 2L: Protein–protein docking representation of hACE2 and RBD of B.1.525(Eta) (EPI\_ISL\_760883).** (A) The interaction representation, which includes hydrogen (—), salt bridges (—), and non-bonded (|||||) interactions. Chain A represents hACE2 and chain B represents RBD. Residue colors: positive (blue): H,K,R; negative (red): D,E; neutral (green): S,T,N,Q; aliphatic (grey): A,V,L,I,M; aromatic (purple): F,Y,W; Pro & Gly (orange): P,G. (B) The binding interface of hACE2:RBD complex

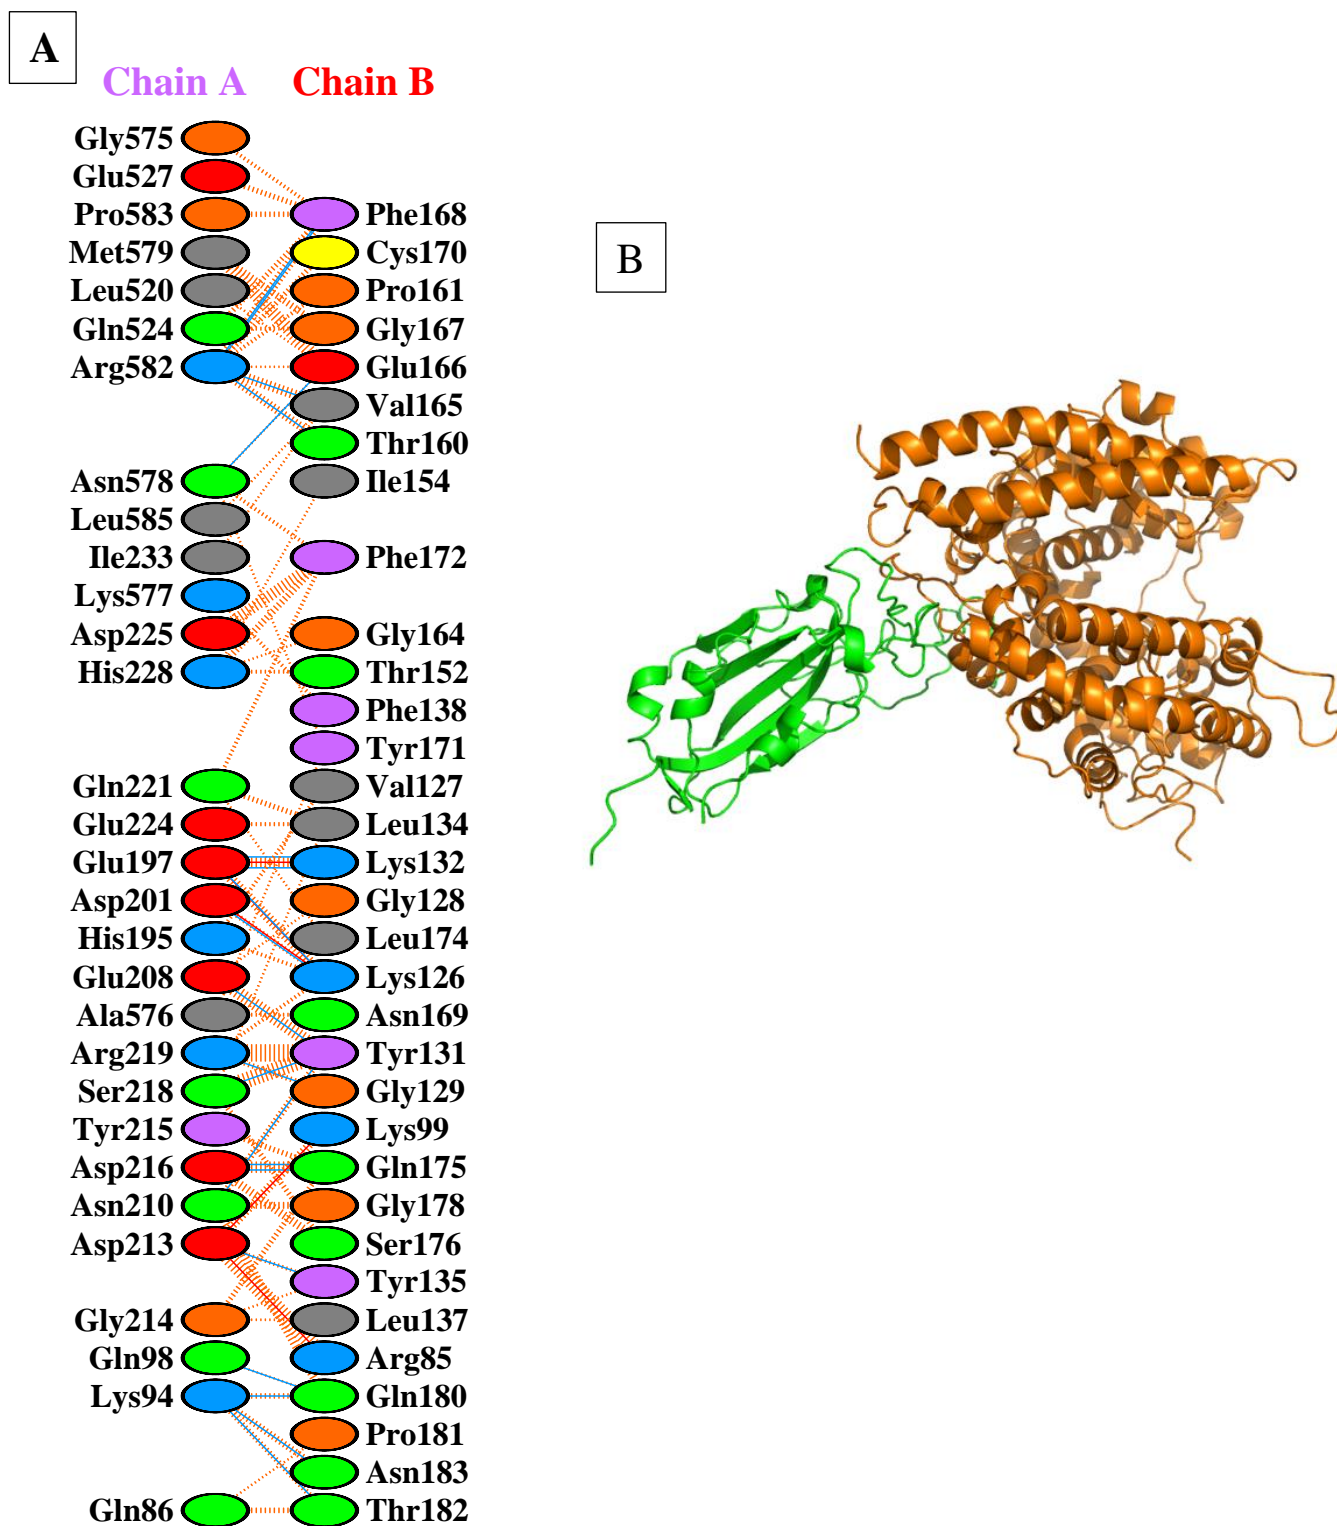

**Supplementary Figure 2M: Protein–protein docking representation of hACE2 and RBD of B.1.214.2 (EPI\_ISL\_760951).** (A) The interaction representation, which includes hydrogen (—), salt bridges (—), and non-bonded (|||) interactions. Chain A represents hACE2 and chain B represents RBD. Residue colors: positive (blue): H,K,R; negative (red): D,E; neutral (green): S,T,N,Q; aliphatic (grey): A,V,L,I,M; aromatic (purple): F,Y,W; Pro & Gly (orange): P,G. (B) The binding interface of hACE2:RBD complex



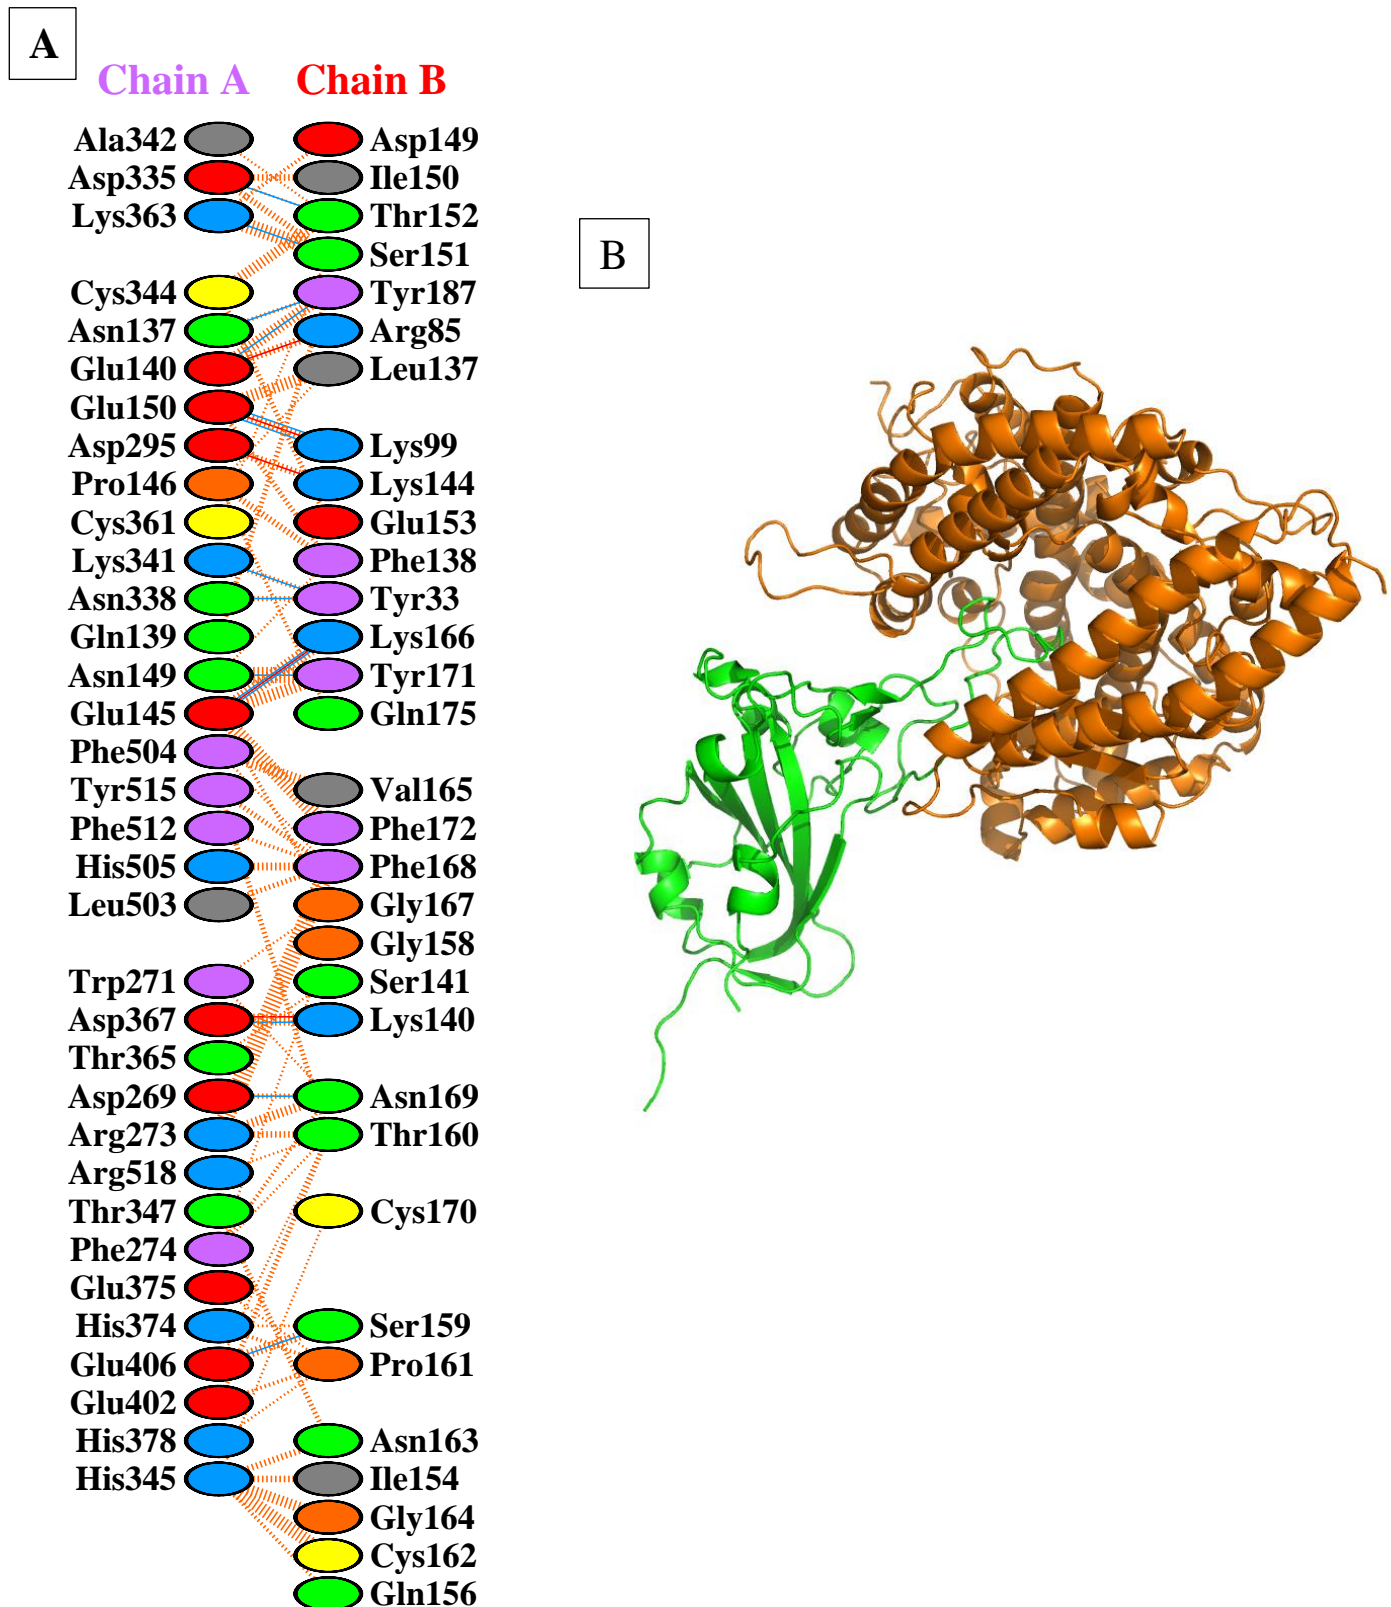

**Supplementary Figure 2N: Protein–protein docking representation of hACE2 and RBD of B.1.526(Lota) (EPI\_ISL\_765494).** (A) The interaction representation, which includes hydrogen (—), salt bridges (—), and non-bonded (|||||) interactions. Chain A represents hACE2 and chain B represents RBD. Residue colors: positive (blue): H,K,R; negative (red): D,E; neutral (green): S,T,N,Q; aliphatic (grey): A,V,L,I,M; aromatic (purple): F,Y,W; Pro & Gly (orange): P,G. (B) The binding interface of hACE2:RBD complex

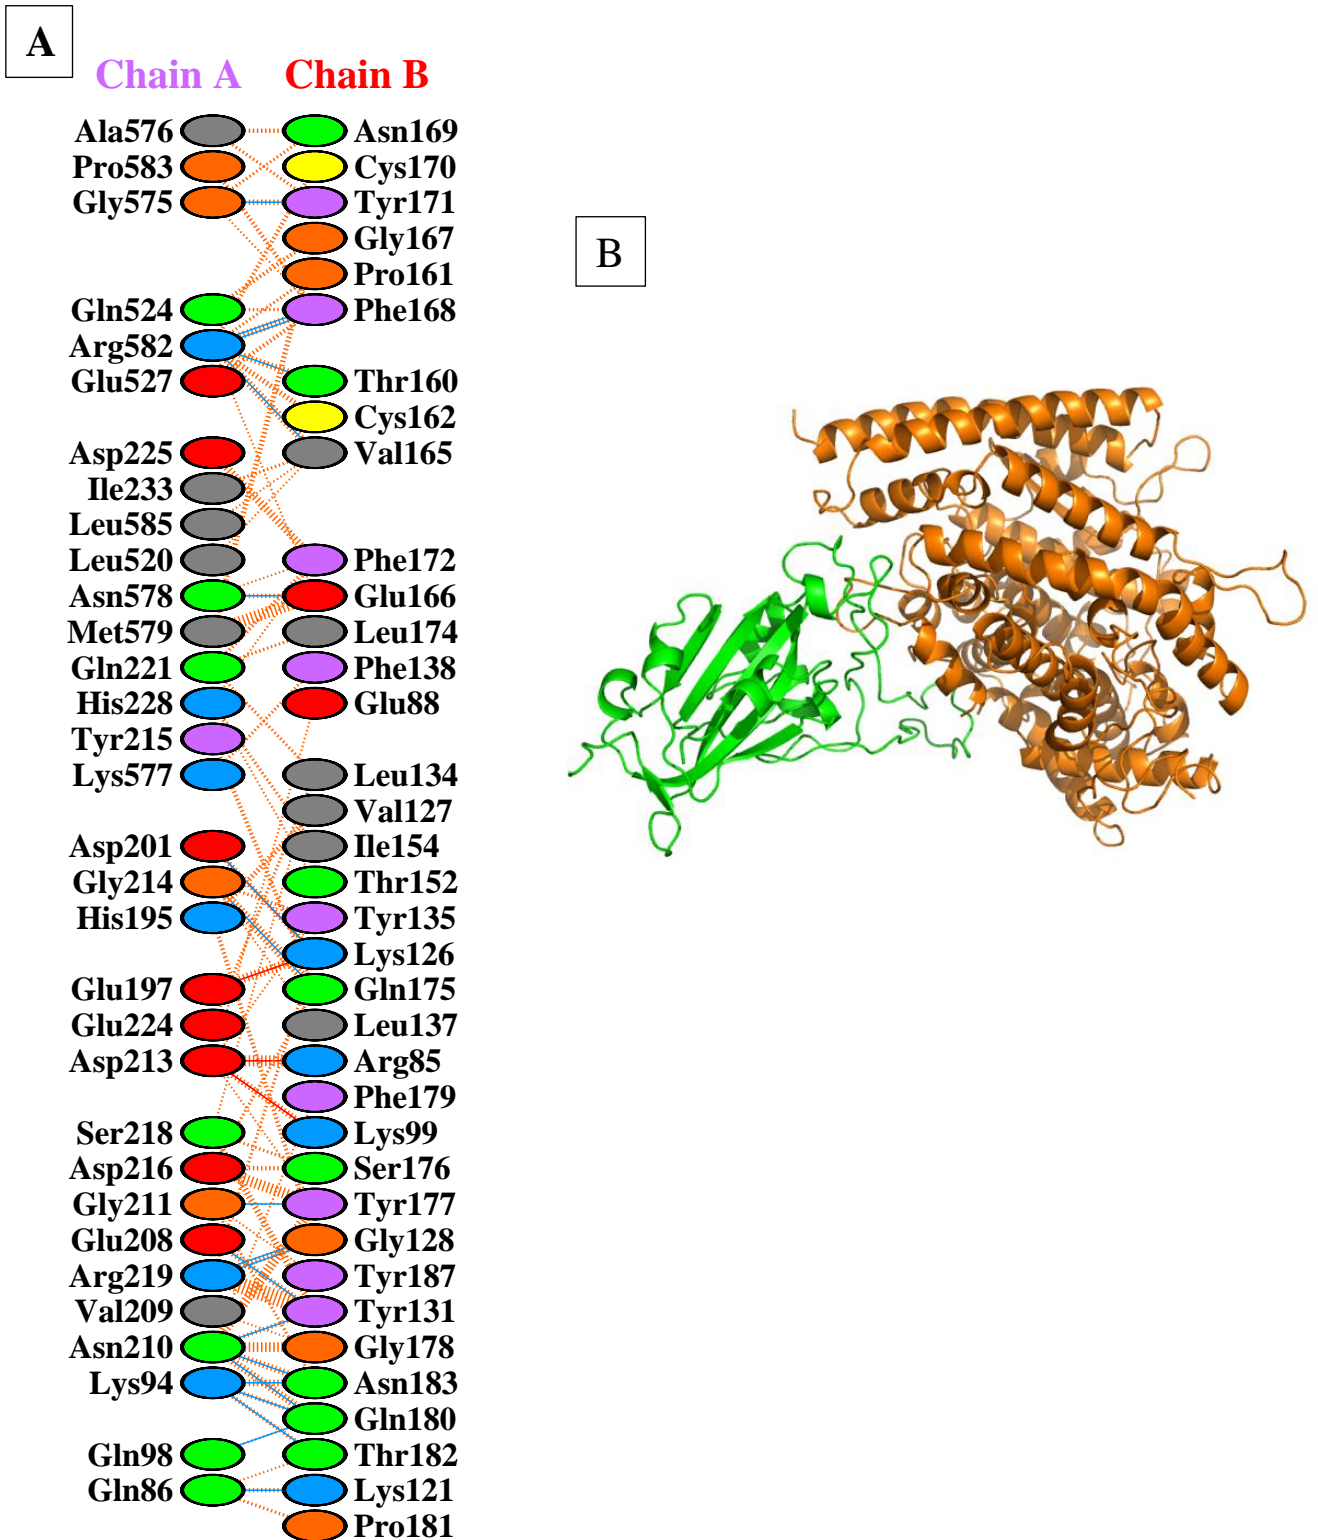

**Supplementary Figure 20: Protein–protein docking representation of hACE2 and RBD of B.1.466.2 (EPI\_ISL\_877419).** (A) The interaction representation, which includes hydrogen (—), salt bridges (—), and non-bonded (|||||) interactions. Chain A represents hACE2 and chain B represents RBD. Residue colors: positive (blue): H,K,R; negative (red): D,E; neutral (green): S,T,N,Q; aliphatic (grey): A,V,L,I,M; aromatic (purple): F,Y,W; Pro & Gly (orange): P,G. (B) The binding interface of hACE2:RBD complex

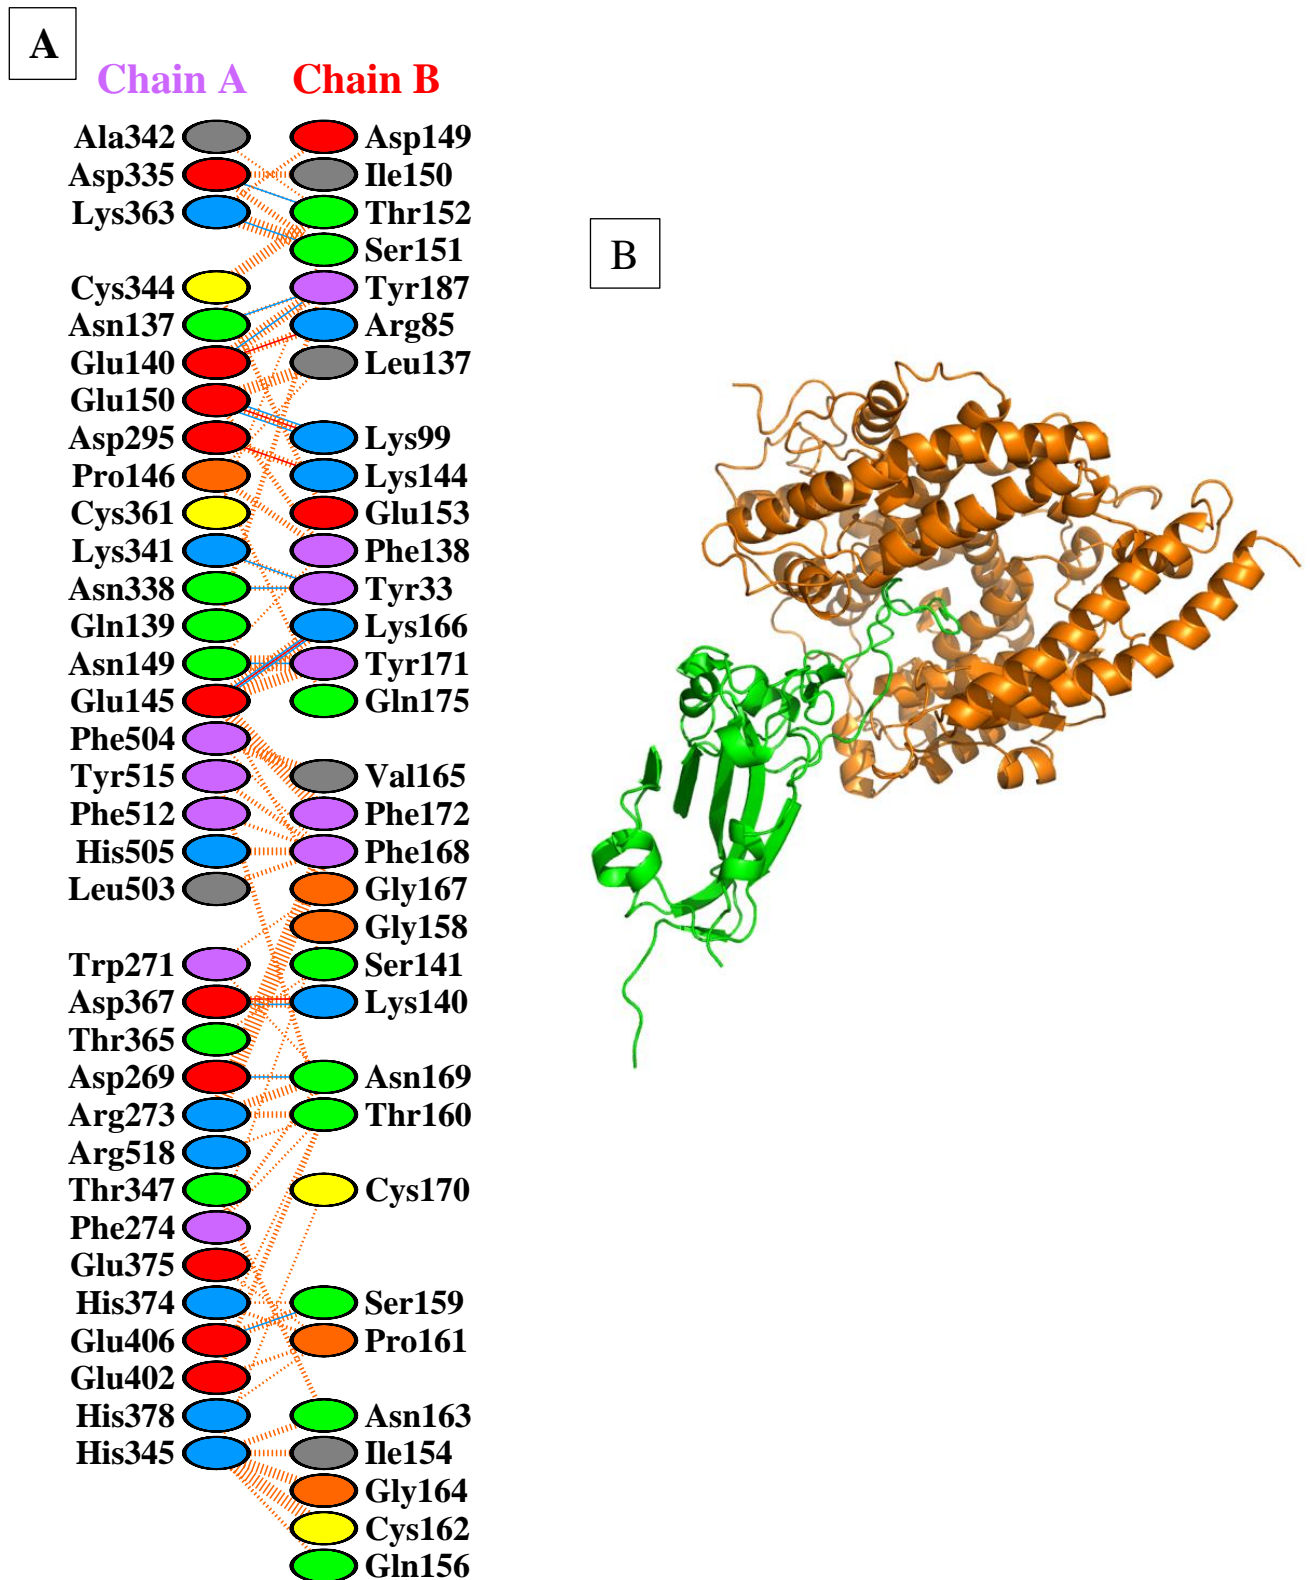

**Supplementary Figure 2P: Protein–protein docking representation of hACE2 and RBD of B.1.1.318 (EPI\_ISL\_937654).** (A) The interaction representation, which includes hydrogen (—), salt bridges (—), and non-bonded (|||||) interactions. Chain A represents hACE2 and chain B represents RBD. Residue colors: positive (blue): H,K,R; negative (red): D,E; neutral (green): S,T,N,Q; aliphatic (grey): A,V,L,I,M; aromatic (purple): F,Y,W; Pro & Gly (orange): P,G. (B) The binding interface of hACE2:RBD complex

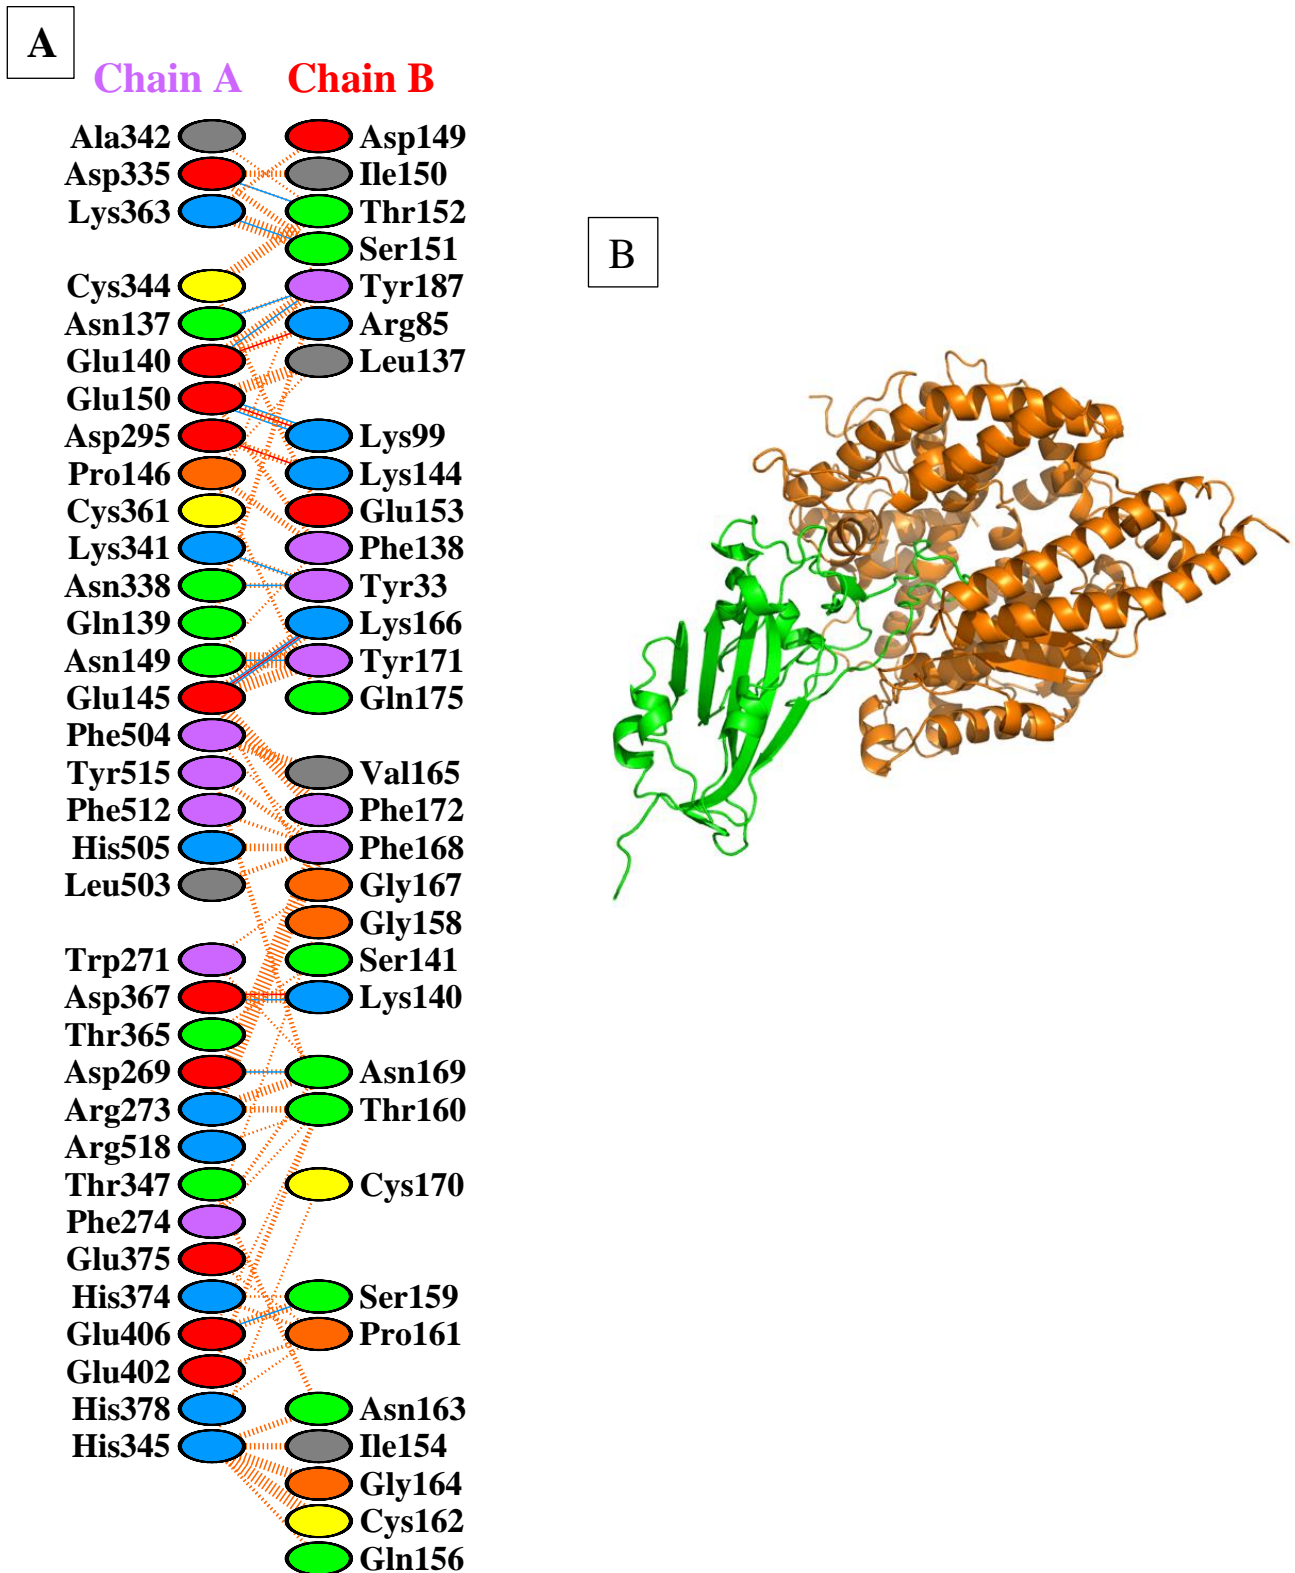

**Supplementary Figure 2Q: Protein–protein docking representation of hACE2 and RBD of B.1.619 (EPI\_ISL\_1150929).** (A) The interaction representation, which includes hydrogen (—), salt bridges (—), and non-bonded (|||||) interactions. Chain A represents hACE2 and chain B represents RBD. Residue colors: positive (blue): H,K,R; negative (red): D,E; neutral (green): S,T,N,Q; aliphatic (grey): A,V,L,I,M; aromatic (purple): F,Y,W; Pro & Gly (orange): P,G. (B) The binding interface of hACE2:RBD complex



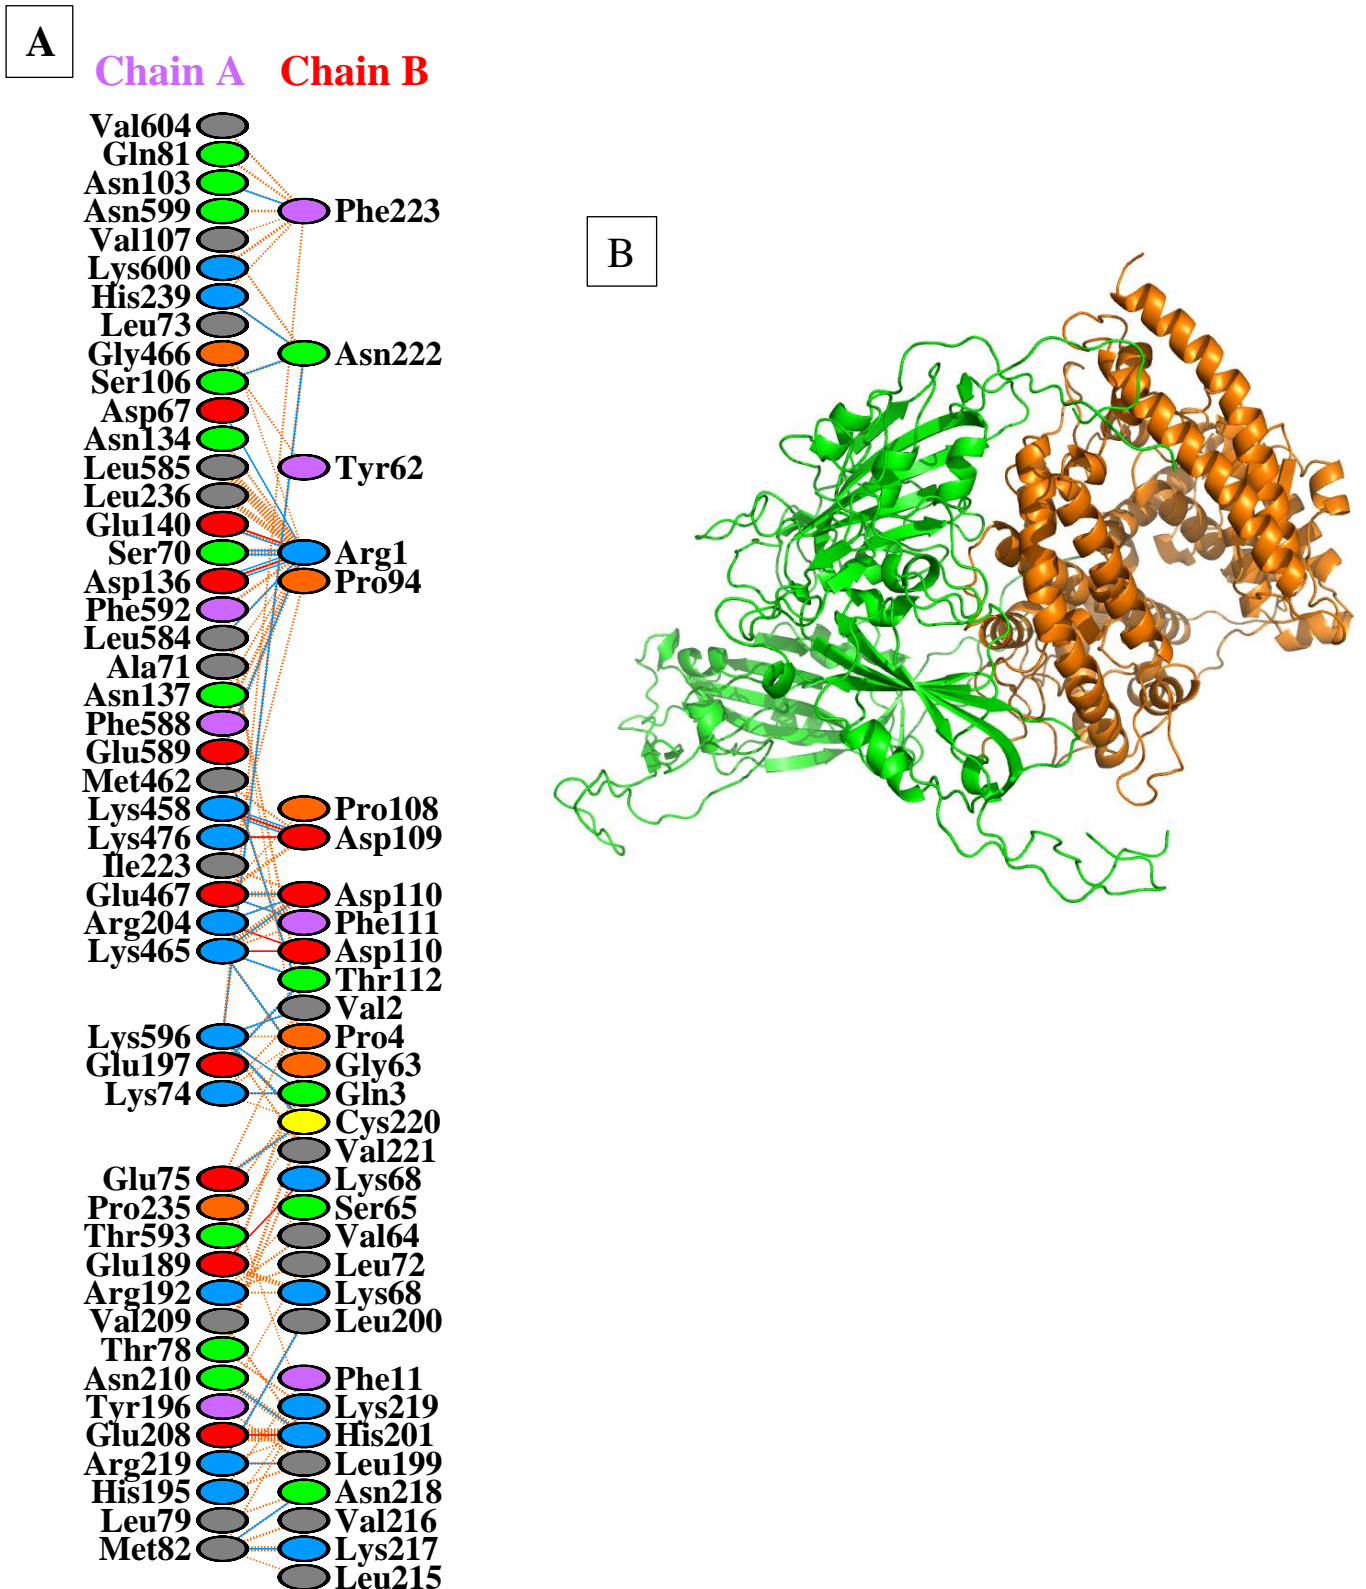

**Supplementary Figure 2R: Protein–protein docking representation of hACE2 and RBD of C.36.3 (EPI\_ISL\_1237137).** (A) The interaction representation, which includes hydrogen (—), salt bridges (—), and non-bonded (|||||) interactions. Chain A represents hACE2 and chain B represents RBD. Residue colors: positive (blue): H,K,R; negative (red): D,E; neutral (green): S,T,N,Q; aliphatic (grey): A,V,L,I,M; aromatic (purple): F,Y,W; Pro & Gly (orange): P,G. (B) The binding interface of hACE2:RBD complex

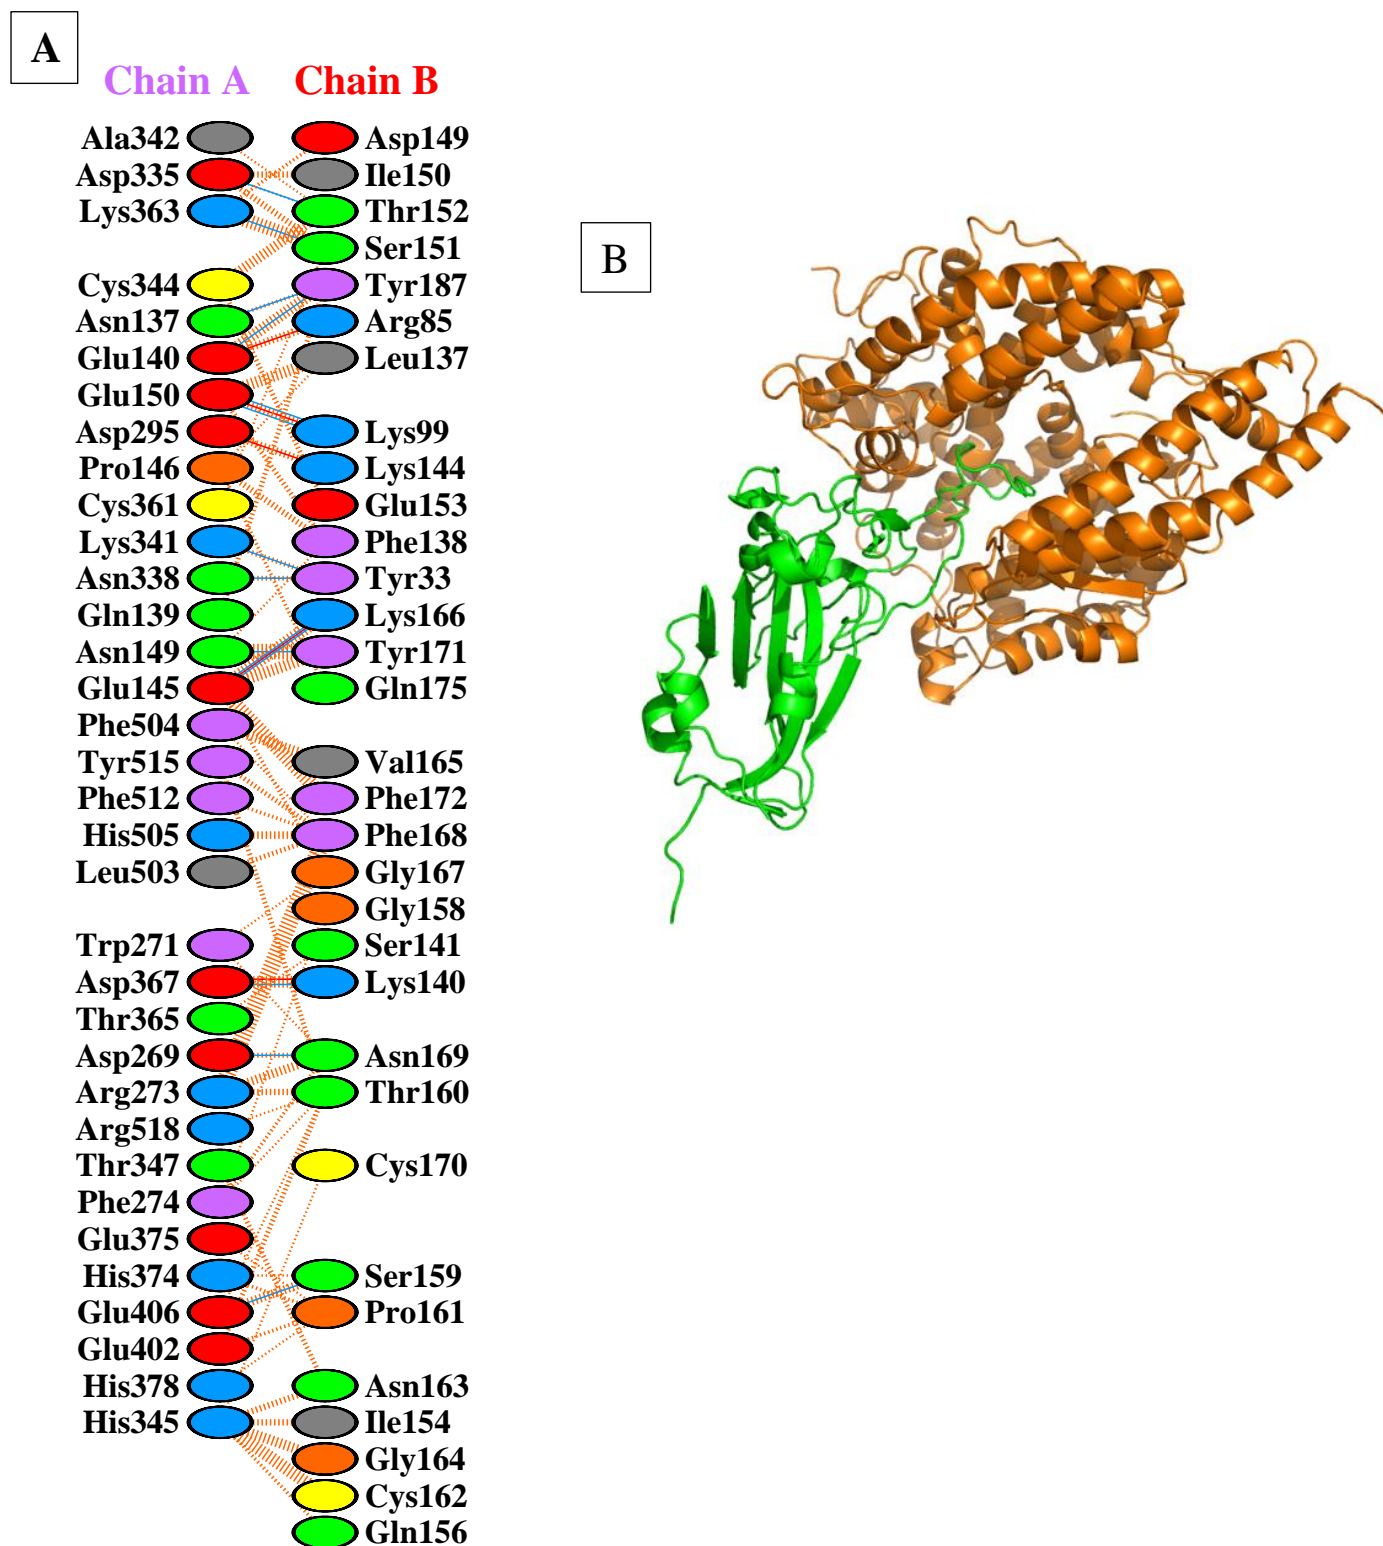

**Supplementary Figure 2S: Protein–protein docking representation of hACE2 and RBD of AT.1 (EPI\_ISL\_1259283).** (A) The interaction representation, which includes hydrogen (—), salt bridges (—), and non-bonded (|||||) interactions. Chain A represents hACE2 and chain B represents RBD. Residue colors: positive (blue): H,K,R; negative (red): D,E; neutral (green): S,T,N,Q; aliphatic (grey): A,V,L,I,M; aromatic (purple): F,Y,W; Pro & Gly (orange): P,G. (B) The binding interface of hACE2:RBD complex

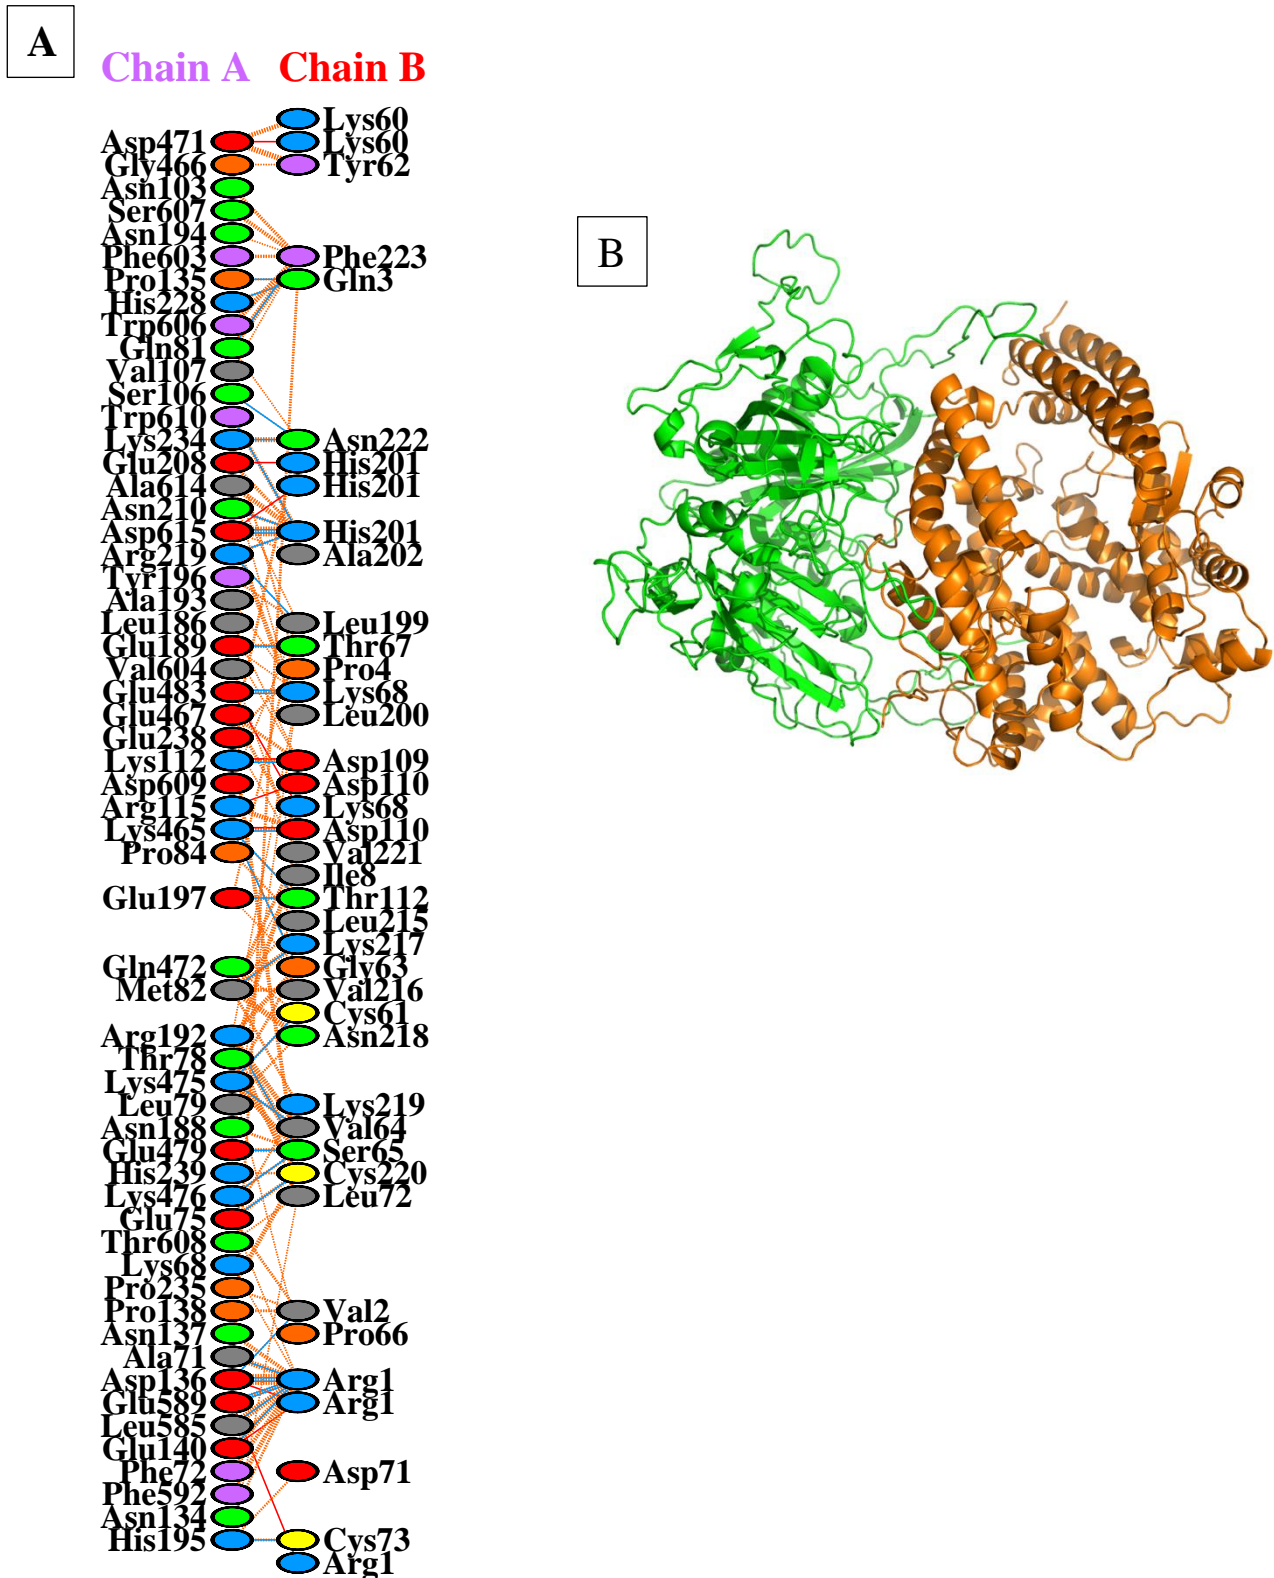

**Supplementary Figure 2T: Protein–protein docking representation of hACE2 and RBD of B.1.617.1(Kappa) (EPI\_ISL\_1357699).** (A) The interaction representation, which includes hydrogen (—), salt bridges (—), and non-bonded (|||||) interactions. Chain A represents hACE2 and chain B represents RBD. Residue colors: positive (blue): H,K,R; negative (red): D,E; neutral (green): S,T,N,Q; aliphatic (grey): A,V,L,I,M; aromatic (purple): F,Y,W; Pro & Gly (orange): P,G. (B) The binding interface of hACE2:RBD complex

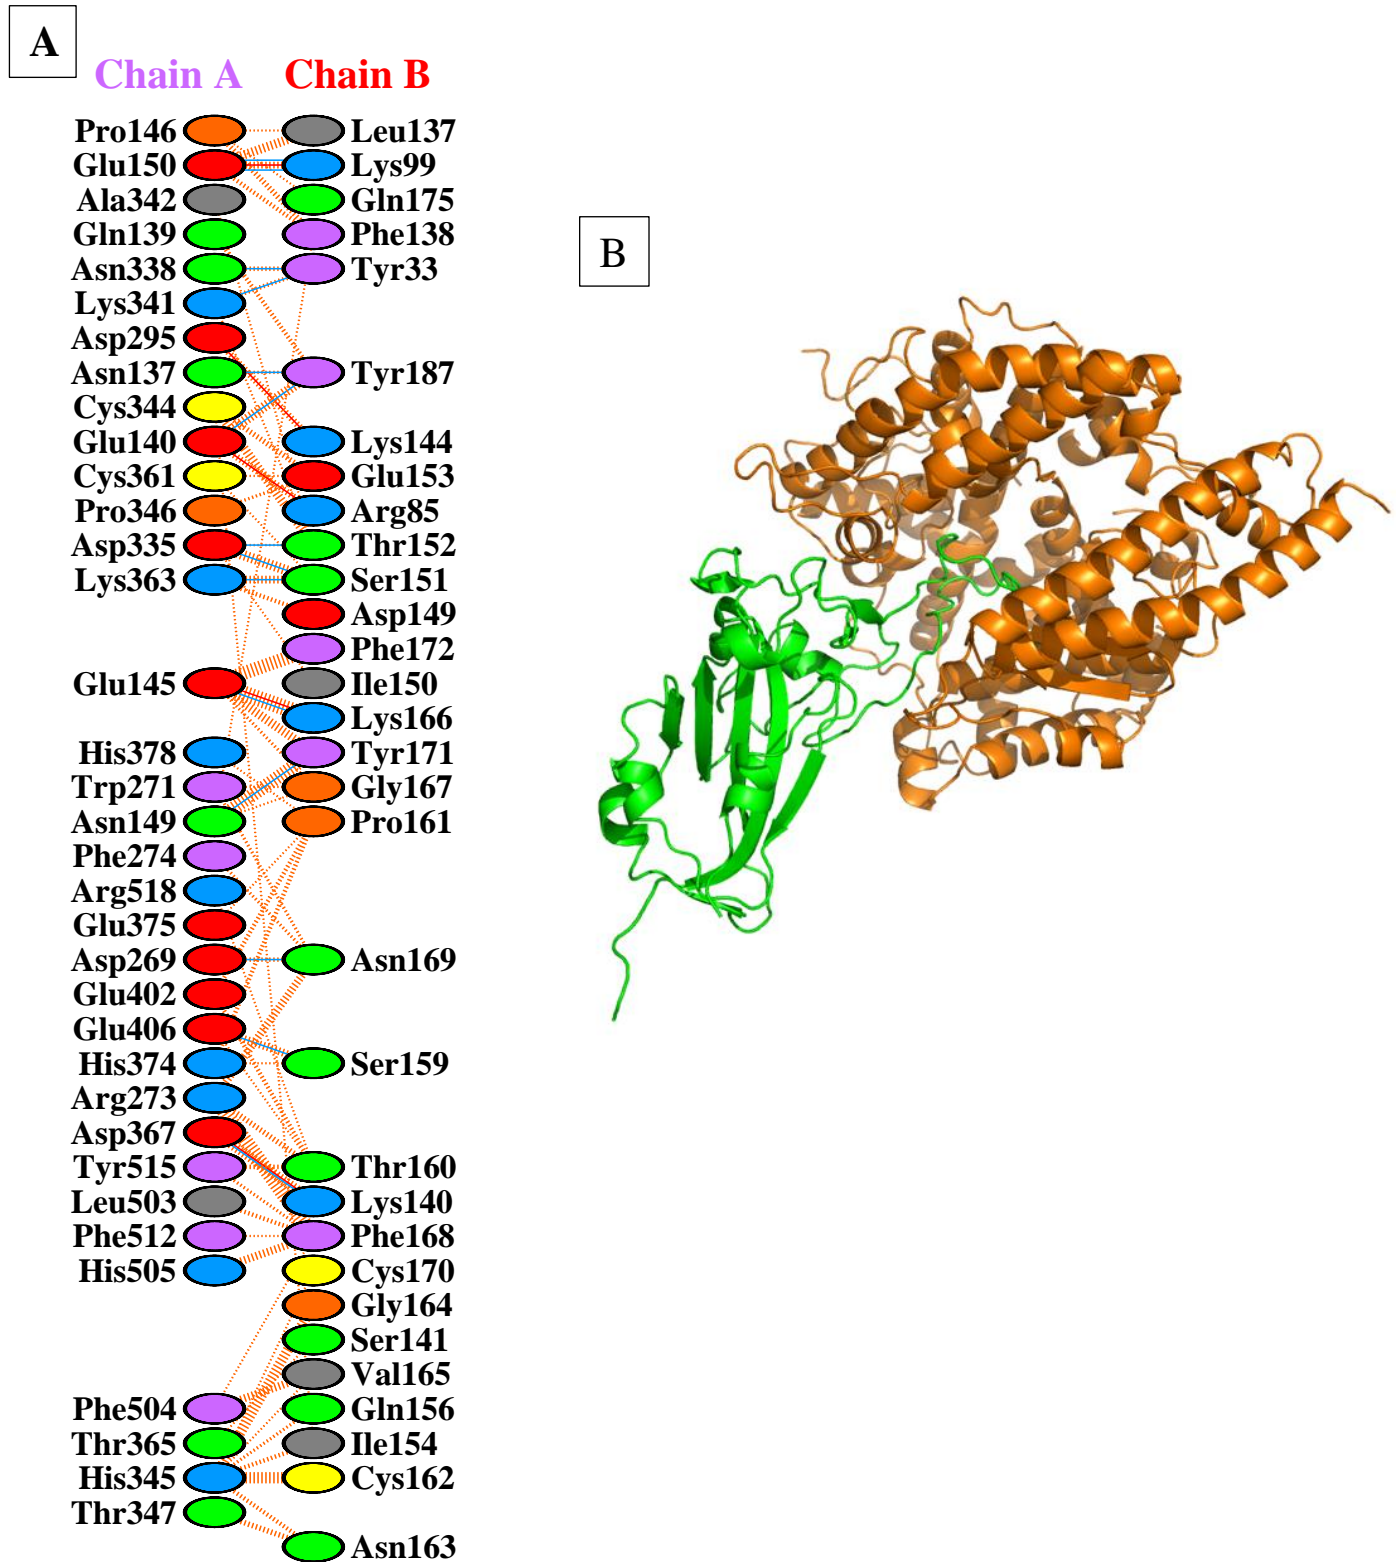

**Supplementary Figure 2U: Protein–protein docking representation of hACE2 and RBD of B.1.1.523 (EPI\_ISL\_1448584) .** (A) The interaction representation, which includes hydrogen (—), salt bridges (—), and non-bonded (|||||) interactions. Chain A represents hACE2 and chain B represents RBD. Residue colors: positive (blue): H,K,R; negative (red): D,E; neutral (green): S,T,N,Q; aliphatic (grey): A,V,L,I,M; aromatic (purple): F,Y,W; Pro & Gly (orange): P,G. (B) The binding interface of hACE2:RBD complex



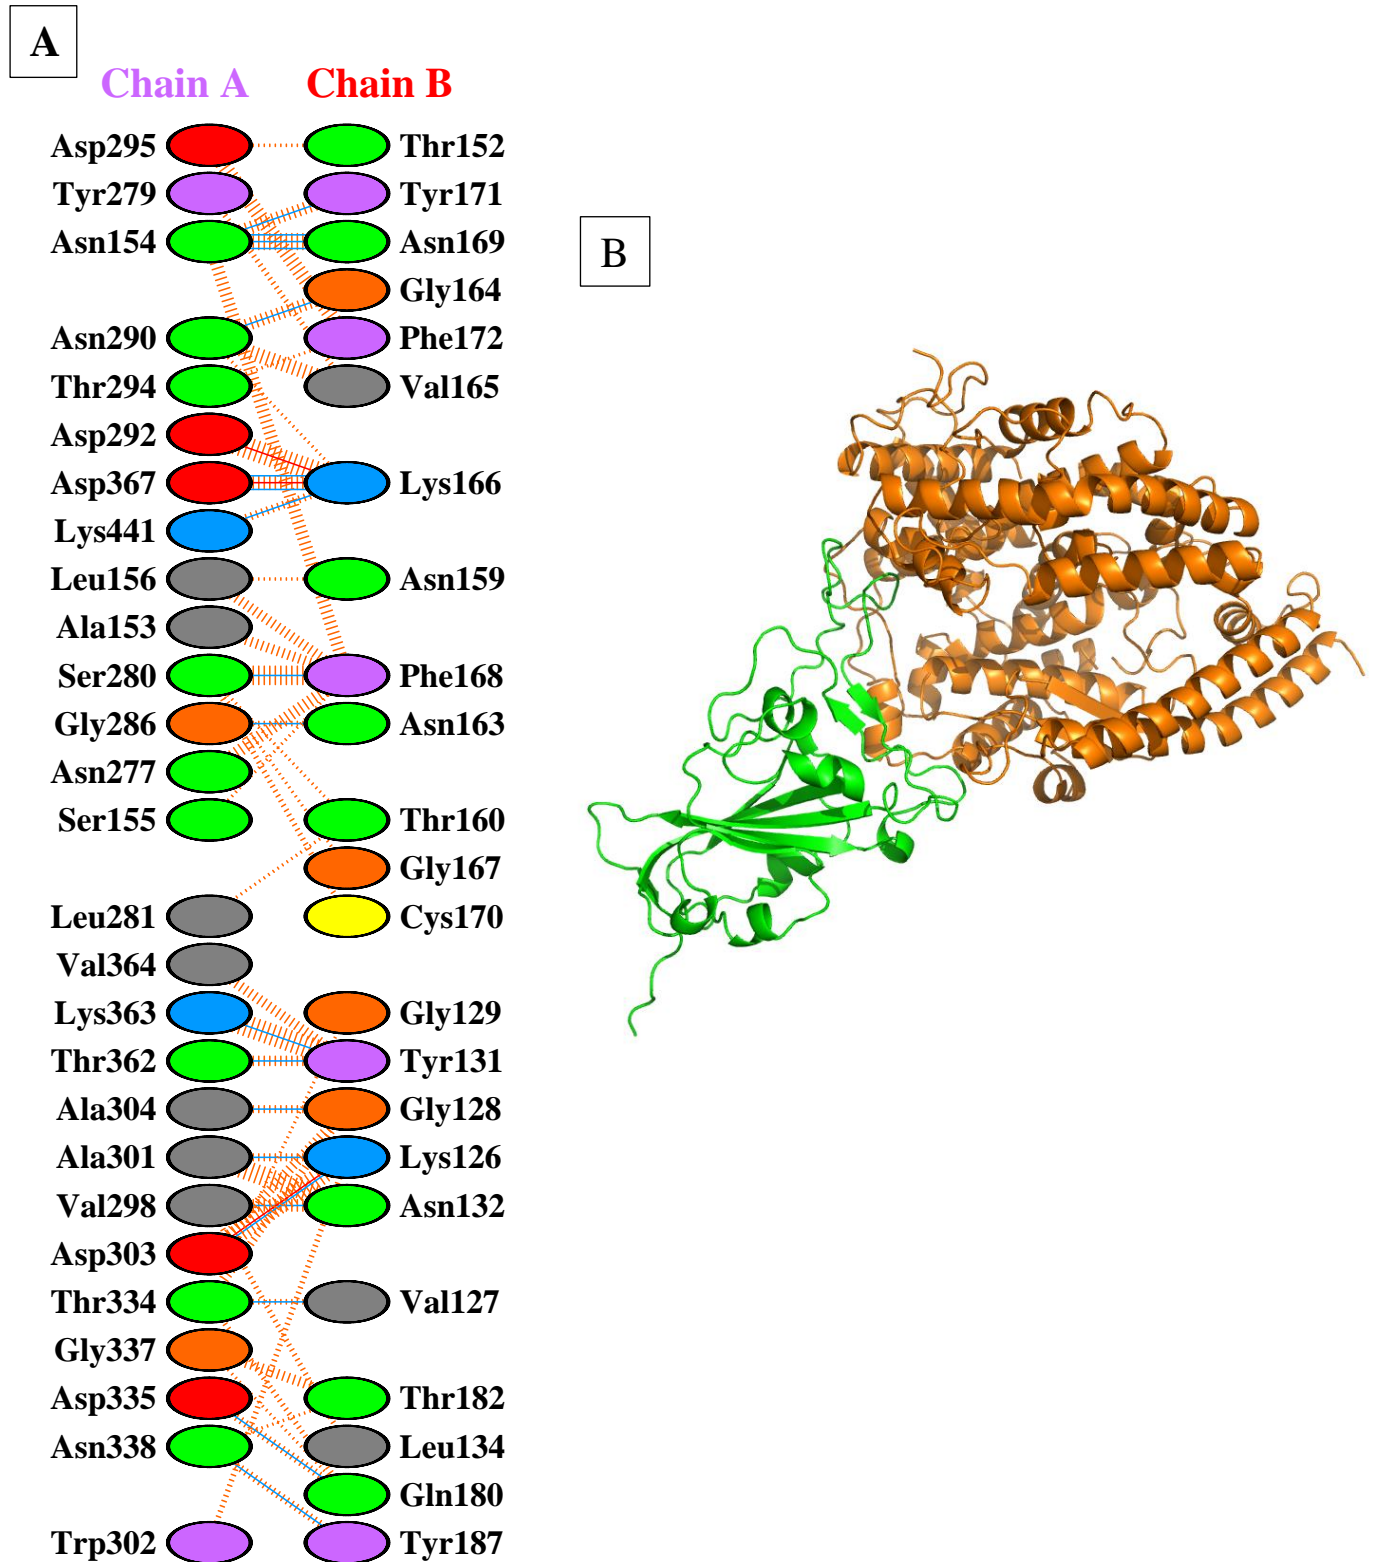

**Supplementary Figure 2V: Protein–protein docking representation of hACE2 and RBD of B.1.620 (EPI\_ISL\_1579527).** (A) The interaction representation, which includes hydrogen (—), salt bridges (—), and non-bonded (|||||) interactions. Chain A represents hACE2 and chain B represents RBD. Residue colors: positive (blue): H,K,R; negative (red): D,E; neutral (green): S,T,N,Q; aliphatic (grey): A,V,L,I,M; aromatic (purple): F,Y,W; Pro & Gly (orange): P,G. (B) The binding interface of hACE2:RBD complex

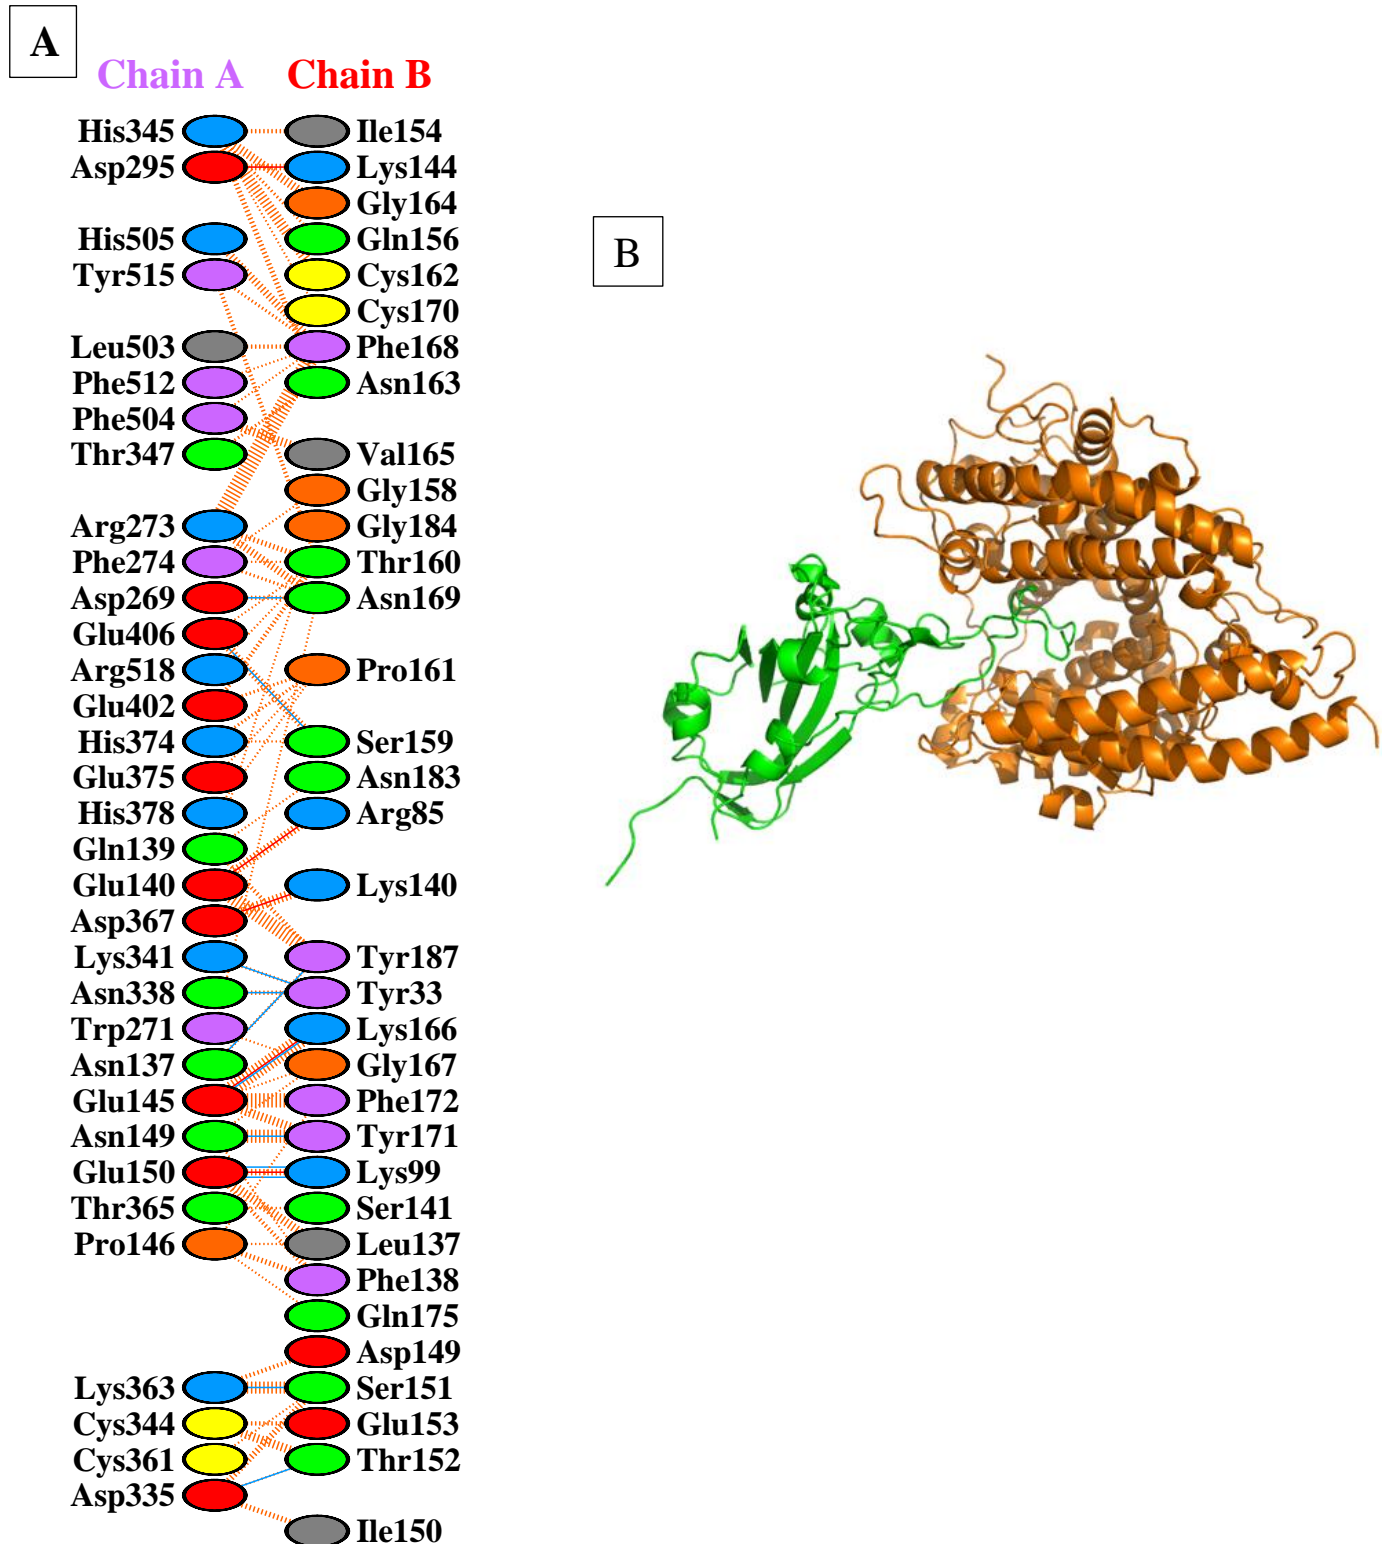

**Supplementary Figure 2W: Protein–protein docking representation of hACE2 and RBD of AV.1 (EPI\_ISL\_1595332).** (A) The interaction representation, which includes hydrogen (—), salt bridges (—), and non-bonded (|||||) interactions. Chain A represents hACE2 and chain B represents RBD. Residue colors: positive (blue): H,K,R; negative (red): D,E; neutral (green): S,T,N,Q; aliphatic (grey): A,V,L,I,M; aromatic (purple): F,Y,W; Pro & Gly (orange): P,G. (B) The binding interface of hACE2:RBD complex

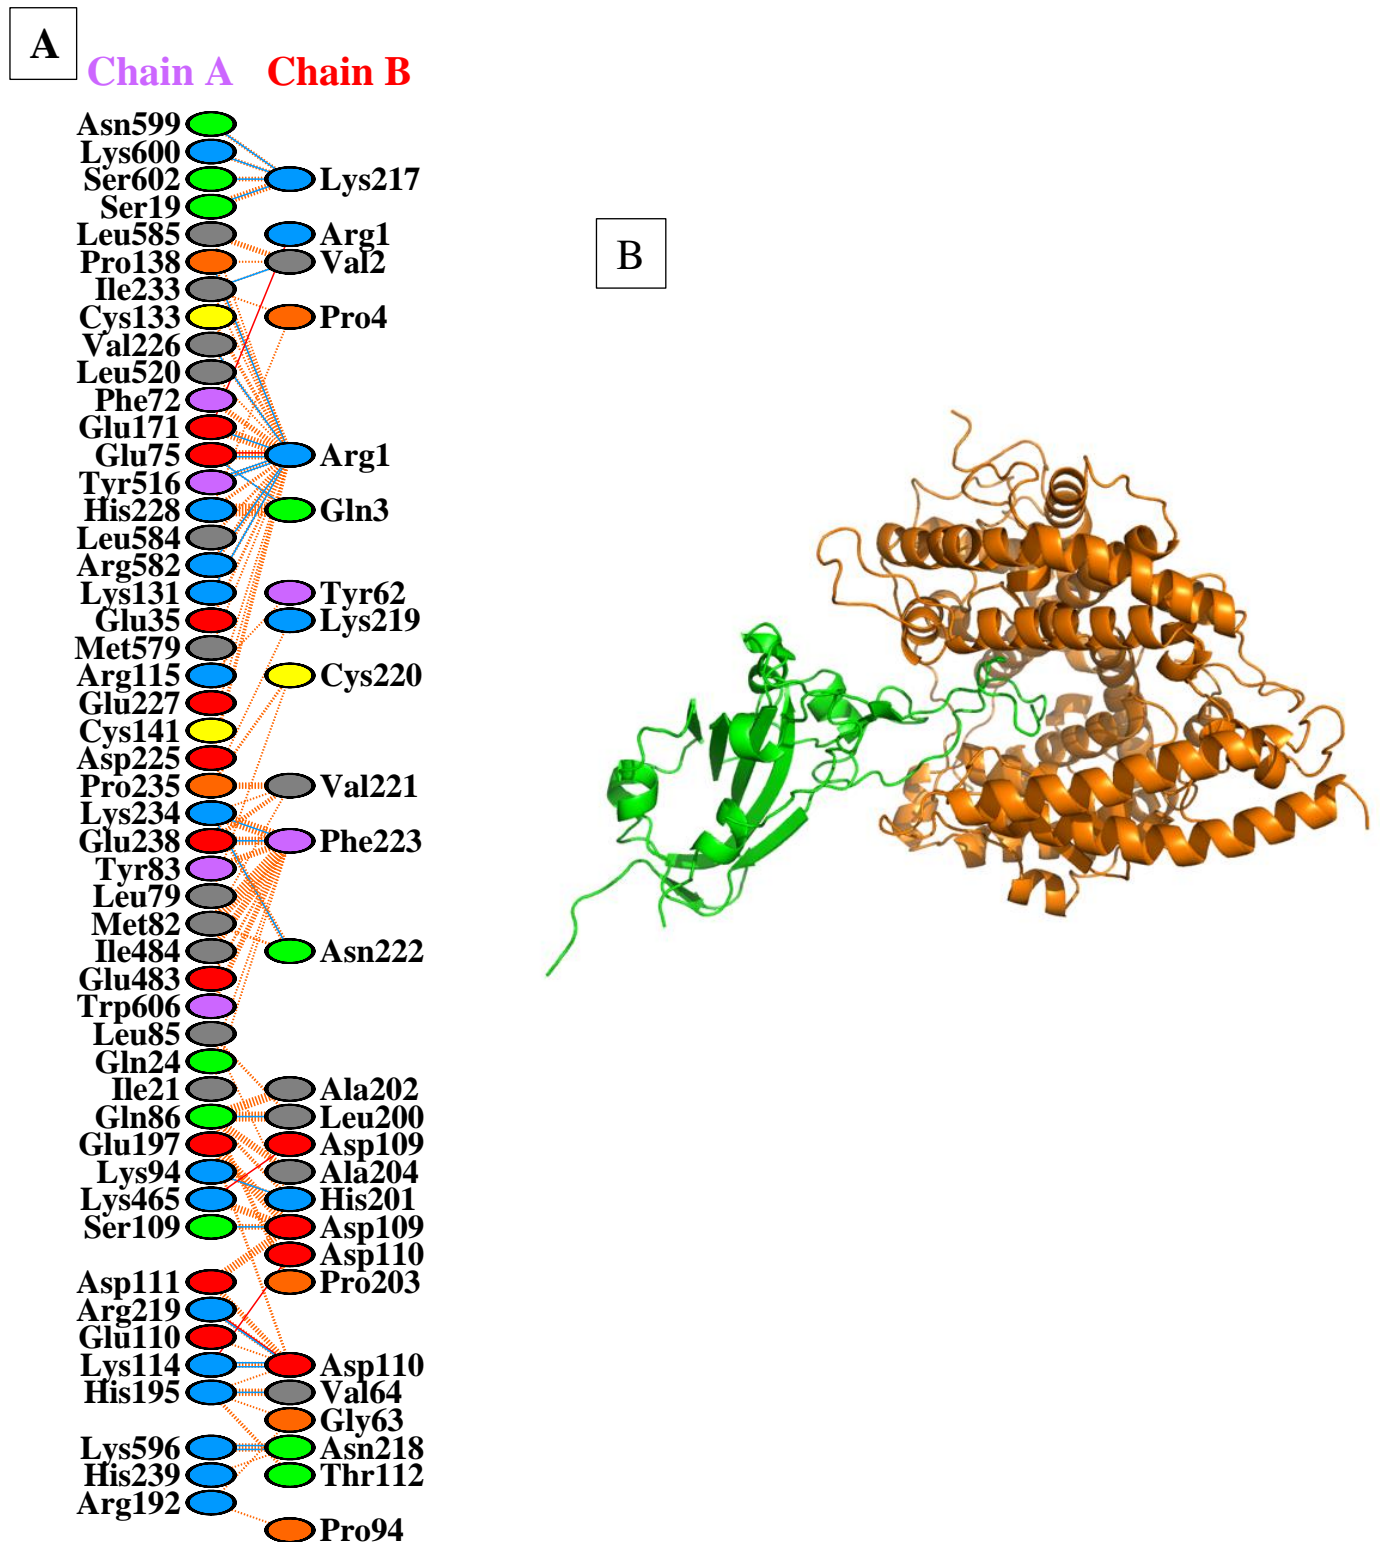

**Supplementary Figure 2X: Protein–protein docking representation of hACE2 and RBD of B.1.630 (EPI\_ISL\_3045385).** (A) The interaction representation, which includes hydrogen (—), salt bridges (—), and non-bonded (|||||) interactions. Chain A represents hACE2 and chain B represents RBD. Residue colors: positive (blue): H,K,R; negative (red): D,E; neutral (green): S,T,N,Q; aliphatic (grey): A,V,L,I,M; aromatic (purple): F,Y,W; Pro & Gly (orange): P,G. (B) The binding interface of hACE2:RBD complex

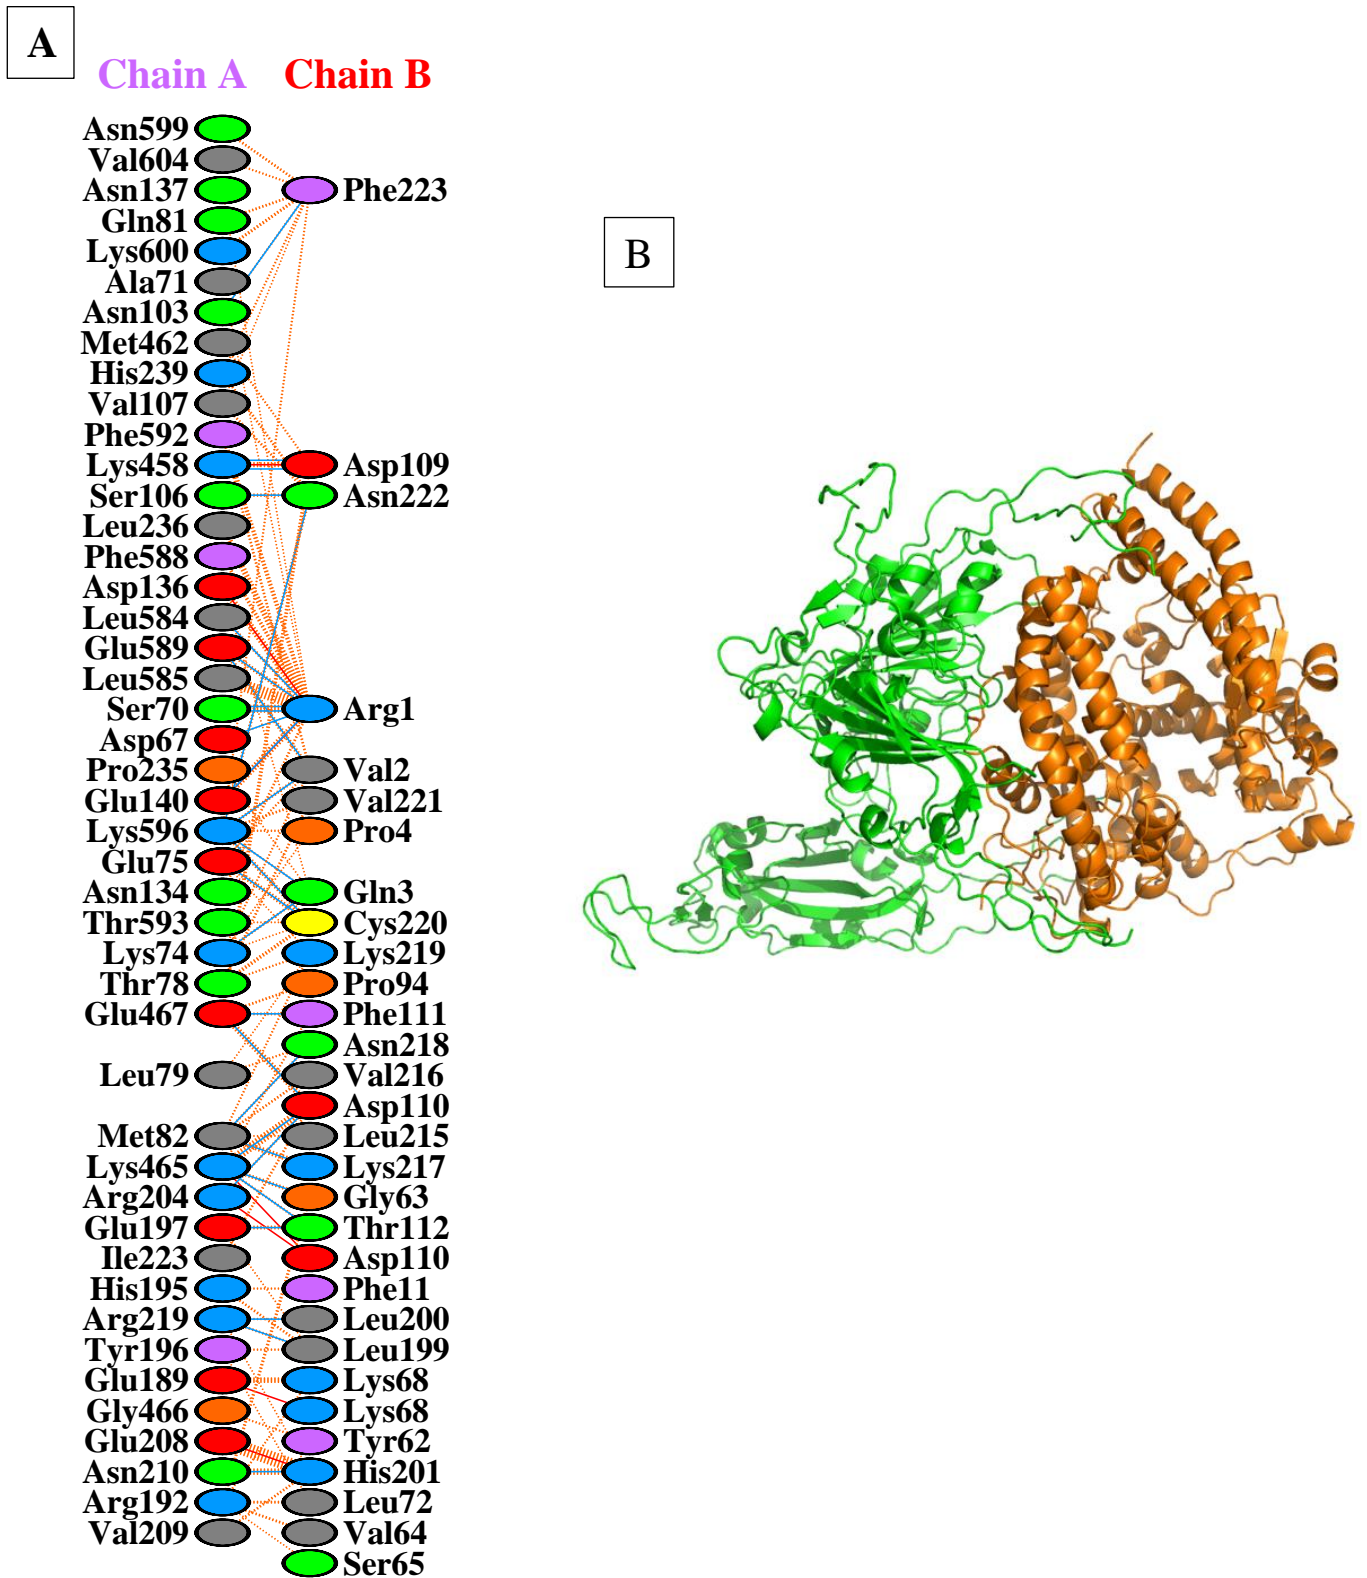

**Supplementary Figure 2Y: Protein–protein docking representation of hACE2 and RBD of C.1.2 (EPI\_ISL\_3447714) . (A)** The interaction representation, which includes hydrogen (—), salt bridges (—), and non-bonded (|||||) interactions. Chain A represents hACE2 and chain B represents RBD. Residue colors: positive (blue): H,K,R; negative (red): D,E; neutral (green): S,T,N,Q; aliphatic (grey): A,V,L,I,M; aromatic (purple): F,Y,W; Pro & Gly (orange): P,G. **(B)** The binding interface of hACE2:RBD complex



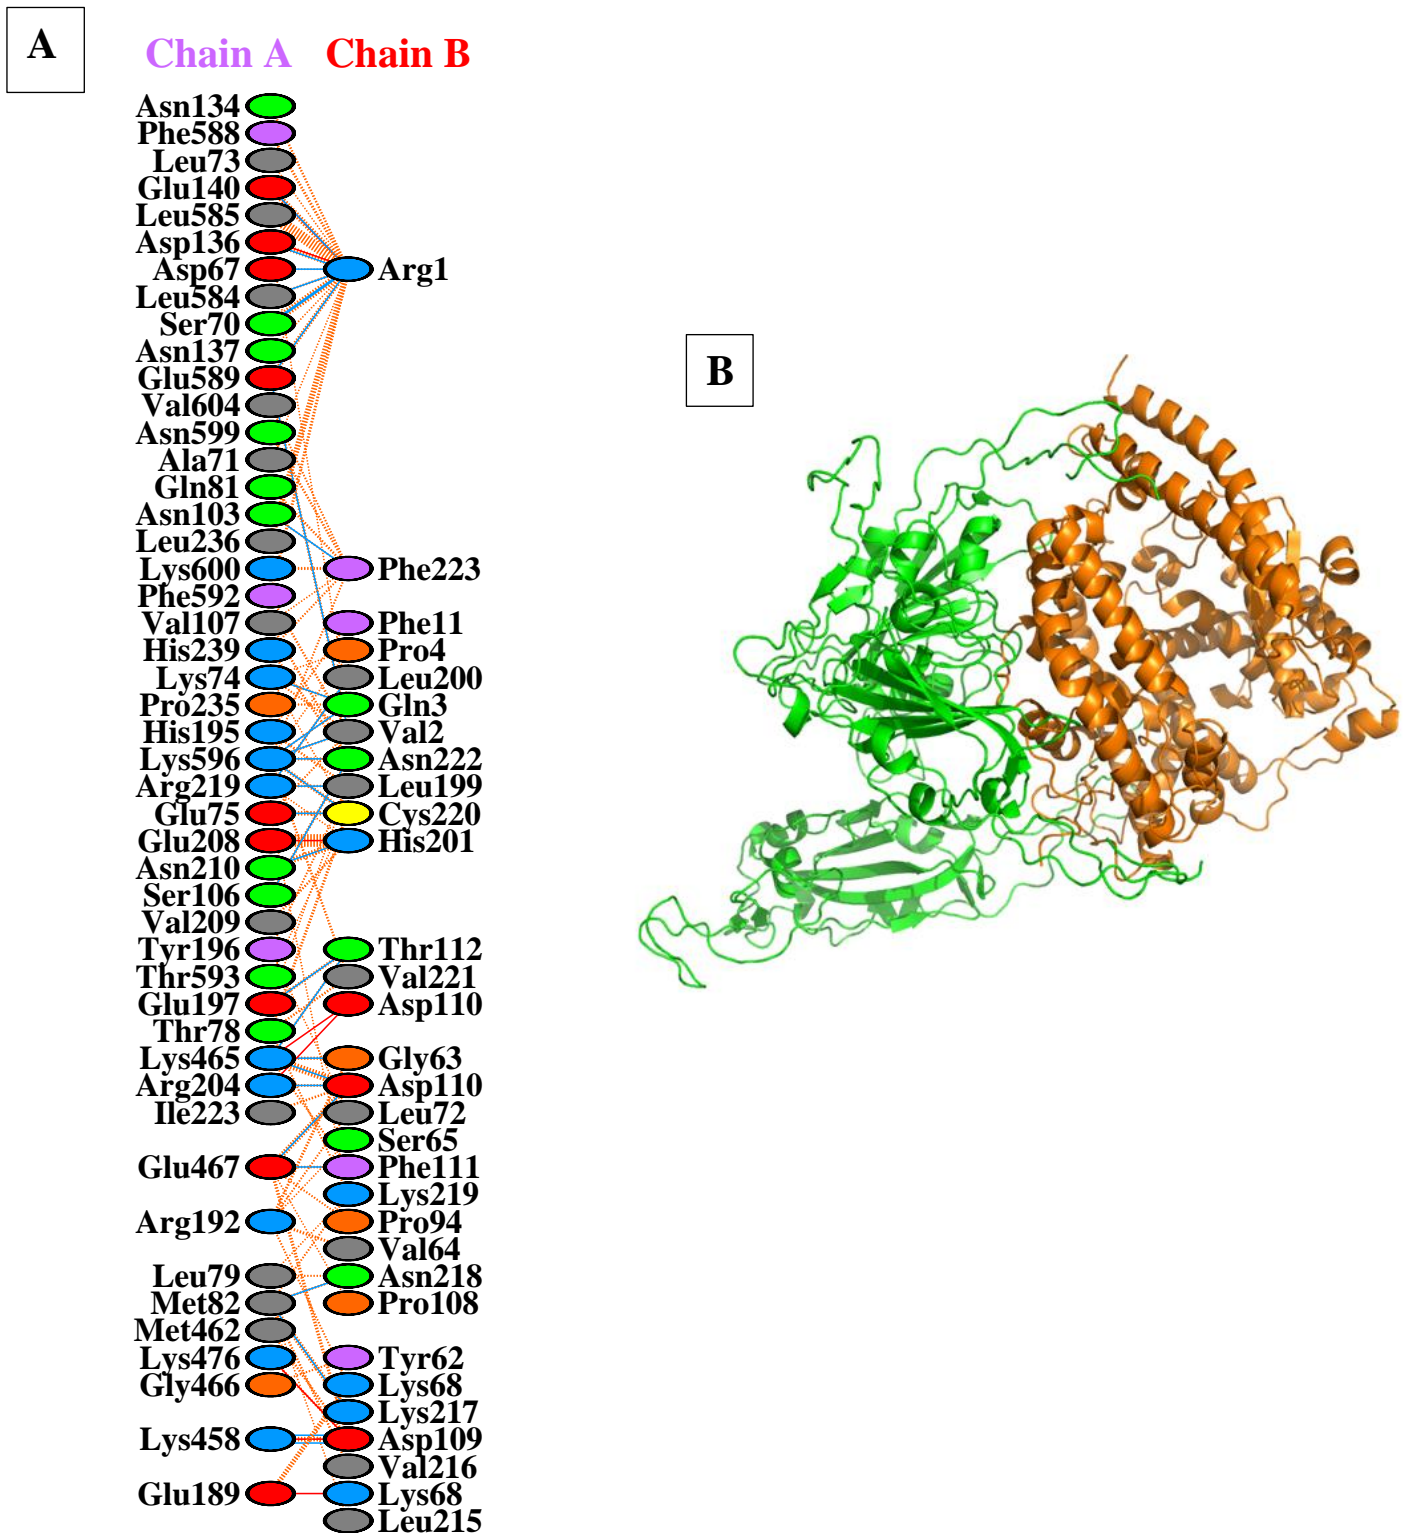

**Supplementary Figure 22: Protein–protein docking representation of hACE2 and RBD of B.1.640 (EPI\_ISL\_5592661).** (A) The interaction representation, which includes hydrogen (—), salt bridges (—), and non-bonded (|||||) interactions. Chain A represents hACE2 and chain B represents RBD. Residue colors: positive (blue): H,K,R; negative (red): D,E; neutral (green): S,T,N,Q; aliphatic (grey): A,V,L,I,M; aromatic (purple): F,Y,W; Pro & Gly (orange): P,G. (B) The binding interface of hACE2:RBD complex
